# Supplementary material for: Transition-metal-free chemoselective reduction of α,β-unsaturated ketones using H2O as a hydrogen source
Source: Royal Society of Chemistry journal article supplement (doi:10.1039/d3qo00963g), 2023-01-01

## Supporting information

### Transition-metal-free chemoselective reduction of $\alpha$ , $\beta$ -unsaturated ketones using H<sub>2</sub>O as hydrogen sources

Enbo Yu,<sup>a</sup> Guojiang Mao,<sup>b</sup> Guo-Jun Deng,<sup>a,\*</sup> and Fuhong Xiao,<sup>a,\*</sup>

<sup>a</sup> Key Laboratory of Environmentally Friendly Chemistry and Application of Ministry of Education, Hunan Province Key Laboratory of Green Organic Synthesis and Application, College of Chemistry, Xiangtan University, Xiangtan 411105, China.

\*E-mail: [gjdeng@xtu.edu.cn](mailto:gjdeng@xtu.edu.cn); [fhxiao@xtu.edu.cn](mailto:fhxiao@xtu.edu.cn)

<sup>b</sup> School of Chemistry and Chemical Engineering, Henan Normal University, Xinxiang, 453007, P. R. China

#### Table of Contents

|                                                              |     |
|--------------------------------------------------------------|-----|
| 1. General information . . . . .                             | S2  |
| 2. General procedure for preparation of substrates . . . . . | S2  |
| 3. General experimental procedure . . . . .                  | S3  |
| 4. General procedure for Control experiments . . . . .       | S4  |
| 5. Characterization data of products . . . . .               | S7  |
| 6. Reference . . . . .                                       | S16 |
| 7. NMR Spectra for the compounds prepared . . . . .          | S18 |

## 1. General information

All reactions were carried out under air atmosphere unless otherwise noted. Column chromatography was performed using silica gel (200-300 mesh).  $^1\text{H}$  NMR and  $^{13}\text{C}$  NMR spectra were recorded on Bruker-AV (400 and 100 MHz, respectively) instrument using  $\text{CDCl}_3$  as solvent and TMS as an internal standard. Mass spectra were measured on Agilent 5977 GC-MS instrument (EI). The structures of known compounds were further corroborated by comparing their  $^1\text{H}$  NMR,  $^{13}\text{C}$  NMR data and MS data with those of literature.

## 2. General procedure for preparation of substrates

Substrates **1a**, **1ac** - **1aj** were purchased from commercial sources; **1b** – **1ab** were prepared from the corresponding aldehydes and ketones according to the literature; while **1ak** were prepared as reported in respective literature.

### Preparation of the $\alpha$ , $\beta$ -unsaturated ketones<sup>1</sup>:

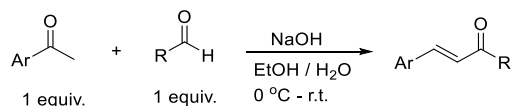

To a solution of ketone (10 mmol, 1.0 equiv.) in 6 mL ethanol was added a solution of NaOH (520 mg, 13 mmol, 1.3 equiv.) in water (10 mL), then the corresponding aldehyde (10 mmol, 1.0 equiv.) was added gradually at 0 °C. The mixture was then allowed to warm to room temperature and stirred overnight. The solid product was collected by suction filtration on a Buchner funnel and washed repeatedly with cold water. Recrystallization from ethanol or purification by silica gel chromatography for liquid products.

### Preparation of **1ak**<sup>2</sup>:

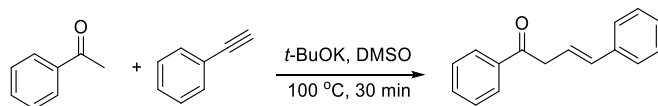

To a solution of acetophenone (2 g, 16.64 mmol, 1 equiv.) and phenyl acetylene (1.83 mL, 16.64 mmol) in DMSO (42 mL) was added *t*-BuOK (1.87 g, 16.64 mmol). The resulting solution was stirred at 100 °C for 0.5 h. The reaction mixture was cooled to room temperature, and the reaction was quenched with the addition of a saturated aqueous  $\text{NH}_4\text{Cl}$  solution (50 mL). The reaction mixture was extracted with EtOAc (50 mL $\times$ 2). The combined organic solution was washed with brine (25 mL), dried over  $\text{MgSO}_4$  and concentrated in vacuo to give crude residue. The resulting

residue was purified by flash chromatography to yield **1am** as a white solid (3 g, 82% yield).

### 3. General experimental procedure

#### General Procedure for Chemoselective Reduction Unsaturated Compounds.

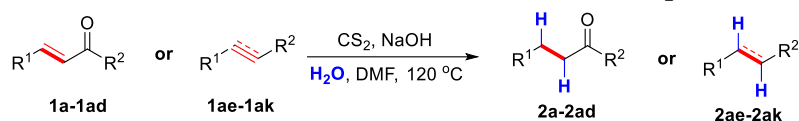

unsaturated compound **1** (0.2 mmol), NaOH (8.0 mg, 0.2 mmol) and CS<sub>2</sub> (42 μL, 0.7 mmol) were added to a reaction vessel (10 mL). *N,N*-dimethylacetamide (1.0 mL) and H<sub>2</sub>O (20 μL) was added by syringe. The reaction was stirred in the oil bath at 120 °C under air for 12 h. After cooling to room temperature, the reaction mixture was diluted with ethyl acetate (15.0 mL) and washed by saturated sodium chloride solution. The organic layer was separated and the aqueous layer was extracted with ethyl acetate for three times. The combined organic layer was dried over MgSO<sub>4</sub> and the volatiles were removed under reduced pressure. The resulting mixture was purified by column chromatography on silica gel (eluted with EtOAc/PE) to afford the desired product.

#### Gram scale synthesis of **2a**

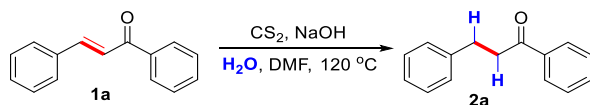

(*E*)-chalcone **1a** (1.04 g, 5 mmol), NaOH (200 mg, 5 mmol) and CS<sub>2</sub> (1.05 mL, 17.5 mmol) were added to a round-bottom flask (100 mL). *N,N*-dimethylacetamide (25 mL) and H<sub>2</sub>O (500 μL) was added by syringe. The reaction was stirred in the oil bath at 120 °C under air for 12 h. After cooling to room temperature, the reaction mixture was diluted with ethyl acetate (15.0 mL) and washed by saturated sodium chloride solution. The organic layer was separated and the aqueous layer was extracted with ethyl acetate for three times. The combined organic layer was dried over MgSO<sub>4</sub> and the volatiles were removed under reduced pressure. The residue was purified by column chromatography on silica gel (petroleum ether/ethyl acetate=30:1) to yield the desired product 1,3-diphenylpropan-1-one **2a** as white solid (892.5 mg, 85% yield).

### 4. The reaction procedure of Control Experiments

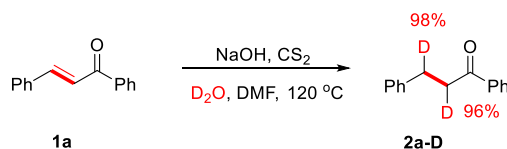

(*E*)-chalcone **1a** (0.2 mmol), NaOH (8.0 mg, 0.2 mmol) and CS<sub>2</sub> (42 μL, 0.7 mmol) were added to

a reaction vessel (10 mL). *N,N*-dimethylacetamide (1.0 mL) and D<sub>2</sub>O (20 μL) was added by syringe. The reaction was stirred in the oil bath at 120 °C under air for 12 h. After cooling to room temperature, the reaction mixture was diluted with ethyl acetate (15.0 mL) and washed by saturated sodium chloride solution. The organic layer was separated and the aqueous layer was extracted with ethyl acetate for three times. The combined organic layer was dried over MgSO<sub>4</sub> and the volatiles were removed under reduced pressure. The resulting mixture was purified by column chromatography on silica gel (eluted with EtOAc/PE) to afford the desired product **2a-D** in 89% isolated yield, and the <sup>1</sup>H NMR spectrum showed 98 % d-incorporation at the β position and 96 % d-incorporation at α position:

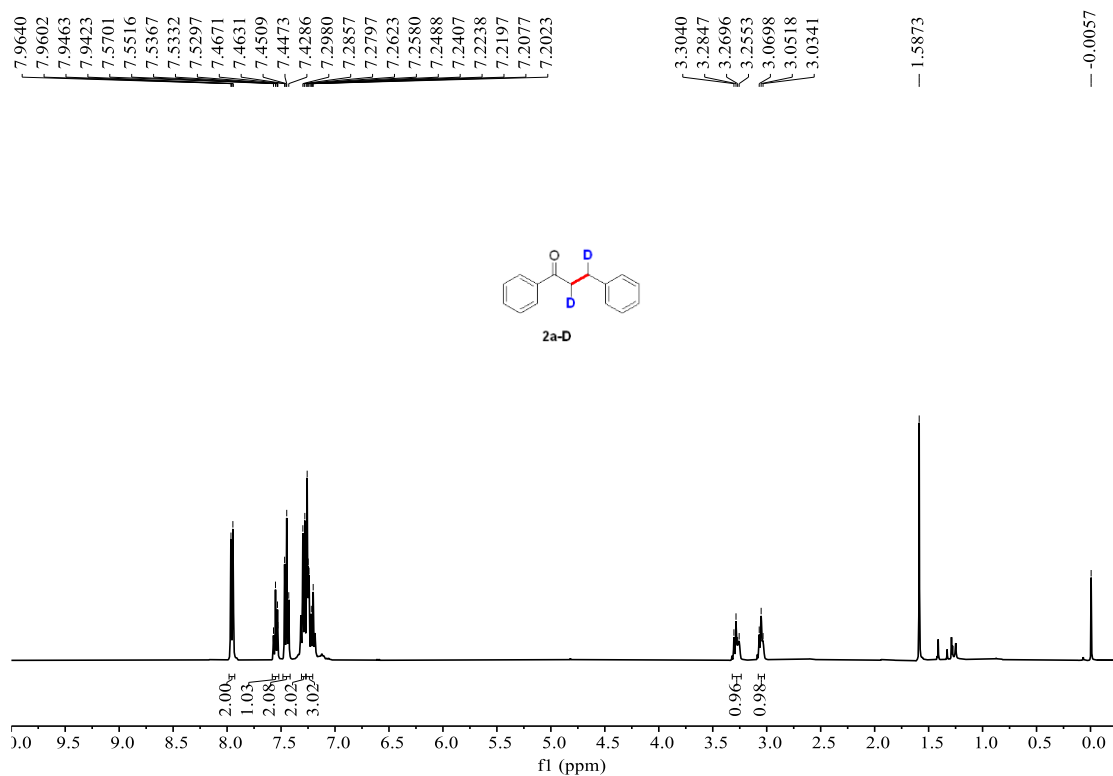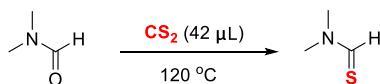

*N,N*-Dimethylformamide (1 mL), and CS<sub>2</sub> (42 μL, 0.7 mmol) were added to a reaction vessel (10 mL). The reaction was stirred in the oil bath at 120 °C under air for 12 h. After cooling to room temperature, the reaction mixture was diluted with ethyl acetate (15.0 mL) and washed by saturated sodium chloride solution. The organic layer was separated and the aqueous layer was extracted with ethyl acetate for three times. The combined organic layer was dried over MgSO<sub>4</sub> and the volatiles were removed under reduced pressure. The consequence was detected by GC-MS.

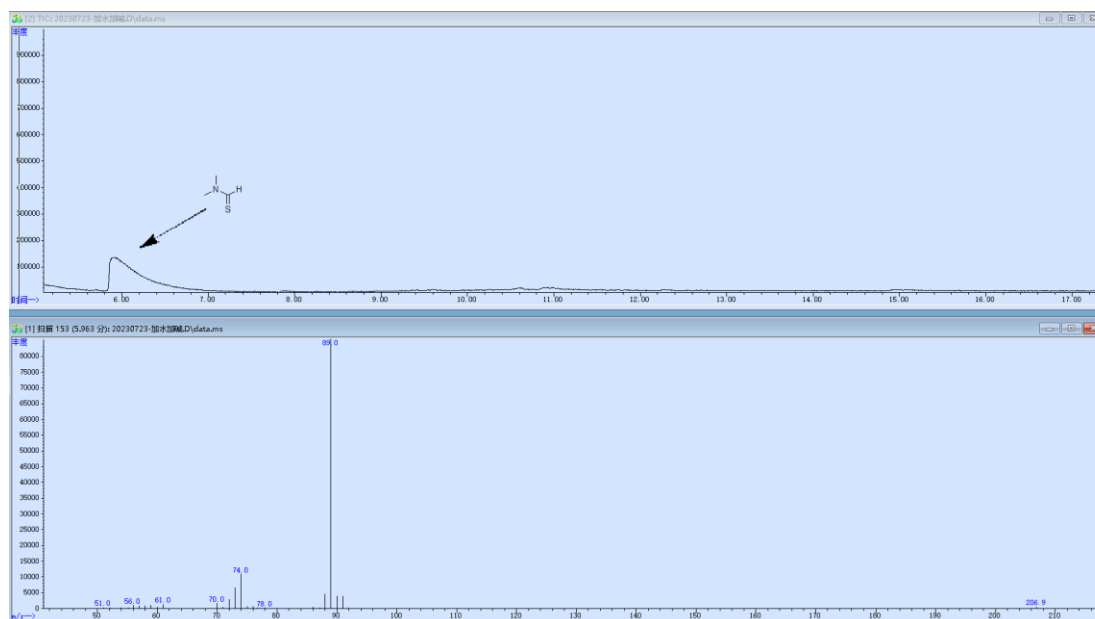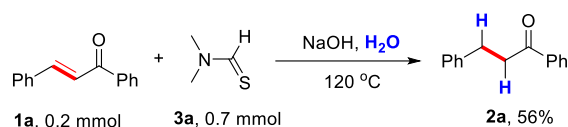

(*E*)-chalcone **1a** (0.2 mmol), NaOH (8.0 mg, 0.2 mmol) and **3a** (59.5  $\mu\text{L}$ , 0.7 mmol) were added to a reaction vessel (10 mL). H<sub>2</sub>O (20  $\mu\text{L}$ ) was added by syringe. The reaction was stirred in the oil bath at 120  $^\circ\text{C}$  under air for 12 h. After cooling to room temperature, the reaction mixture was diluted with ethyl acetate (15.0 mL) and washed by saturated sodium chloride solution. The organic layer was separated and the aqueous layer was extracted with ethyl acetate for three times. The combined organic layer was dried over MgSO<sub>4</sub> and the volatiles were removed under reduced pressure. The resulting mixture was purified by column chromatography on silica gel (eluted with EtOAc/PE) to afford the desired product **2a** in 56% yield.

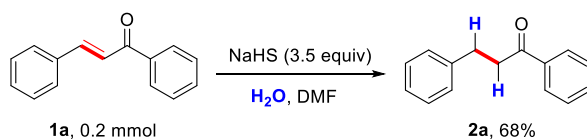

(*E*)-chalcone **1a** (0.2 mmol), NaHS (39.2 mg, 3.5 equiv.) were added to a reaction vessel (10 mL). *N,N*-dimethylacetamide (1.0 mL) and H<sub>2</sub>O (20  $\mu\text{L}$ ) was added by syringe. The reaction was stirred in the oil bath at 120  $^\circ\text{C}$  under air for 12 h. After cooling to room temperature, the reaction mixture was diluted with ethyl acetate (15.0 mL) and washed by saturated sodium chloride solution. The organic layer was separated and the aqueous layer was extracted with ethyl acetate for three times. The combined organic layer was dried over MgSO<sub>4</sub> and the volatiles were removed under reduced

pressure. The resulting mixture was purified by column chromatography on silica gel (eluted with EtOAc/PE) to afford the desired product **2a** in 68% yield.

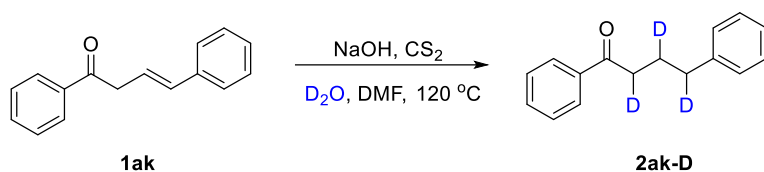

(*E*)-1,4-diphenylbut-3-en-1-one **1ak** (0.2 mmol), NaOH (8.0 mg, 0.2 mmol) and CS<sub>2</sub> (42 μL, 0.7 mmol) were added to a reaction vessel (10 mL). *N,N*-dimethylacetamide (1.0 mL) and D<sub>2</sub>O (20 μL) was added by syringe. The reaction was stirred in the oil bath at 120 °C under air for 12 h. After cooling to room temperature, the reaction mixture was diluted with ethyl acetate (15.0 mL) and washed by saturated sodium chloride solution. The organic layer was separated and the aqueous layer was extracted with ethyl acetate for three times. The combined organic layer was dried over MgSO<sub>4</sub> and the volatiles were removed under reduced pressure. The resulting mixture was purified by column chromatography on silica gel (eluted with EtOAc/PE) to afford the desired product **2ak-D** in 54% isolated yield,

<sup>1</sup>H NMR (400 MHz, CDCl<sub>3</sub>) δ 7.92 (d, *J* = 7.3 Hz, 2H), 7.54 (d, *J* = 7.4 Hz, 1H), 7.45 (t, *J* = 7.7 Hz, 2H), 7.32 – 7.27 (m, 2H), 7.24 – 7.18 (m, 3H), 2.96 (t, *J* = 8.7 Hz, 1H), 2.71 (t, *J* = 7.3 Hz, 1H), 2.06 (q, *J* = 7.3 Hz, 1H).

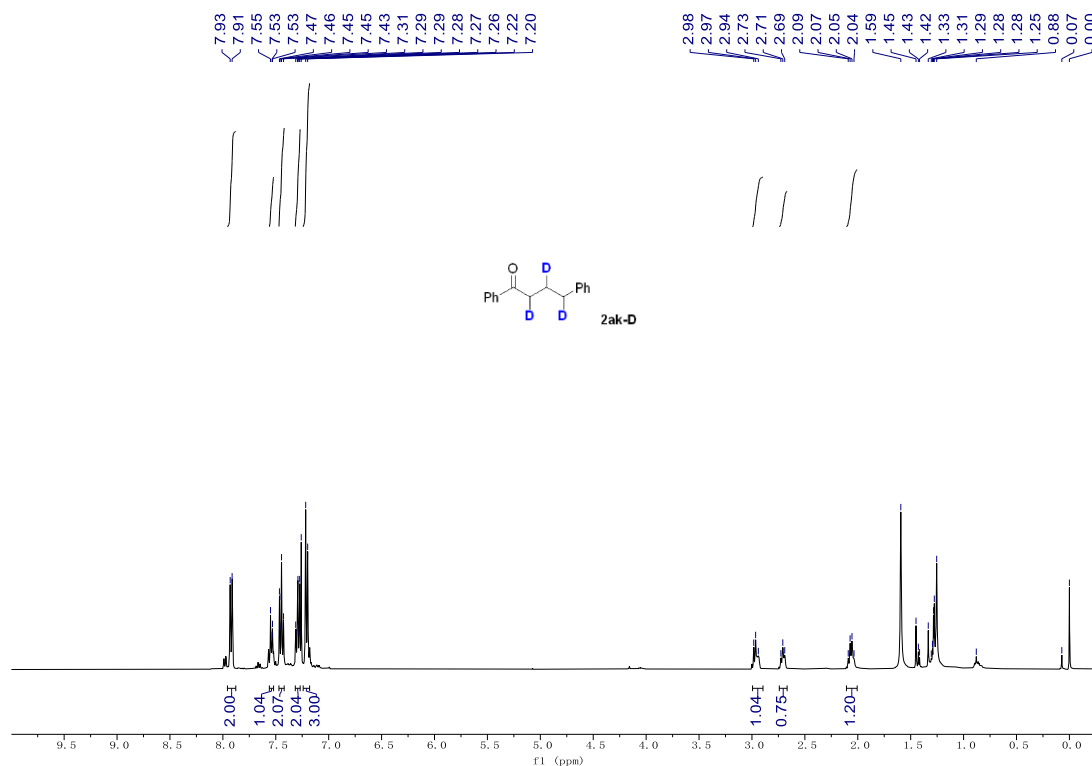

**Detection of H<sub>2</sub>S:** The color change of lead acetate test paper after reaction.

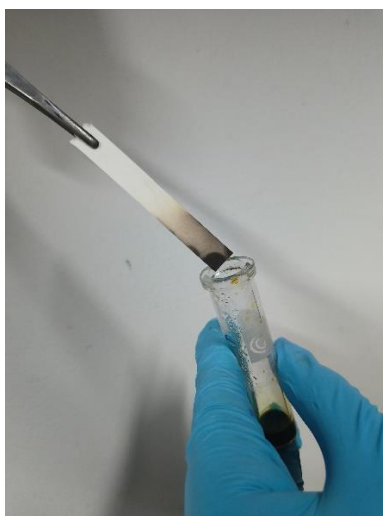

## 5. Characterization data of products

**1,3-diphenylpropan-1-one (2a, CAS: 1083-30-3)<sup>1</sup>**

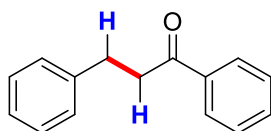

38.6 mg, 92% yield; white solid. <sup>1</sup>H NMR (400 MHz, CDCl<sub>3</sub>) δ 7.96 (d, *J* = 7.1 Hz, 2H), 7.56 (t, *J* = 7.4 Hz, 1H), 7.45 (t, *J* = 7.7 Hz, 2H), 7.32 – 7.24 (m, 4H), 7.22 (t, *J* = 7.0 Hz, 1H), 3.31 (t, *J* = 7.7 Hz, 2H), 3.07 (t, *J* = 7.7 Hz, 2H).

<sup>13</sup>C NMR (101 MHz, CDCl<sub>3</sub>) δ 199.2, 141.2, 136.8, 133.1, 128.6, 128.5, 128.4, 128.0, 126.1, 40.4, 30.1.

**1-phenyl-3-(p-tolyl)propan-1-one (2b)<sup>3</sup>**

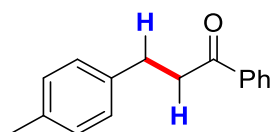

40.3 mg, 90% yield; white solid. <sup>1</sup>H NMR (400 MHz, CDCl<sub>3</sub>) δ 7.95 (d, *J* = 6.8 Hz, 2H), 7.54 (t, *J* = 7.4 Hz, 1H), 7.44 (t, *J* = 7.7 Hz, 2H), 7.13 (q, *J* = 8.0 Hz, 4H), 3.27 (t, *J* = 7.7 Hz, 2H), 3.02 (t, *J* = 7.7 Hz, 2H), 2.32 (s, 3H).

<sup>13</sup>C NMR (101 MHz, CDCl<sub>3</sub>) δ 199.3, 138.1, 136.8, 135.6, 133.0, 129.1, 128.5, 128.2, 128.0, 40.6, 29.6, 21.0.

**3-([1,1'-biphenyl]-4-yl)-1-phenylpropan-1-one (2c)<sup>3</sup>**

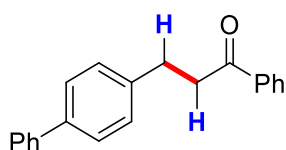

45.8 mg, 80% yield; yellow solid.  $^1\text{H NMR}$  (400 MHz,  $\text{CDCl}_3$ )  $\delta$  7.98 (d,  $J = 7.1$  Hz, 2H), 7.60 – 7.51 (m, 5H), 7.49 – 7.40 (m, 4H), 7.36 – 7.30 (m, 3H), 3.34 (t,  $J = 7.6$  Hz, 2H), 3.11 (t,  $J = 7.7$  Hz, 2H).  $^{13}\text{C NMR}$  (101 MHz,  $\text{CDCl}_3$ )  $\delta$  199.1, 140.9, 140.4, 139.1, 136.8, 133.1, 128.8, 128.7, 128.6, 128.0, 127.2, 127.1, 127.0, 40.3, 29.7.

### 3-(4-fluorophenyl)-1-phenylpropan-1-one (2d)<sup>3</sup>

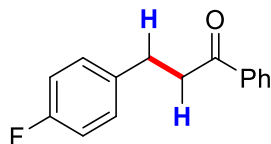

39.7 mg, 87% yield; white solid.  $^1\text{H NMR}$  (400 MHz,  $\text{CDCl}_3$ )  $\delta$  7.95 (d,  $J = 7.0$  Hz, 2H), 7.55 (t,  $J = 7.3$  Hz, 1H), 7.45 (t,  $J = 7.7$  Hz, 2H), 7.23 – 7.17 (m, 2H), 6.97 (t,  $J = 8.7$  Hz, 2H), 3.28 (t,  $J = 7.6$  Hz, 2H), 3.04 (t,  $J = 7.5$  Hz, 2H).

$^{13}\text{C NMR}$  (101 MHz,  $\text{CDCl}_3$ )  $\delta$  199.0, 161.3 (d,  $J = 242$  Hz), 136.8 (d,  $J = 3$  Hz), 136.7, 133.1, 129.8 (d,  $J = 7$  Hz), 128.6, 128.0, 115.2 (d,  $J = 21$  Hz), 40.3, 29.2.

$^{19}\text{F NMR}$  (376 MHz,  $\text{CDCl}_3$ )  $\delta$  -117.21.

### 3-(4-chlorophenyl)-1-phenylpropan-1-one (2e)<sup>4</sup>

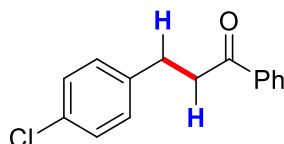

40.5 mg, 83% yield; white solid.  $^1\text{H NMR}$  (400 MHz,  $\text{CDCl}_3$ )  $\delta$  7.95 (d,  $J = 8.1$  Hz, 2H), 7.56 (d,  $J = 7.7$  Hz, 1H), 7.46 (t,  $J = 7.7$  Hz, 2H), 7.27 (d,  $J = 4.7$  Hz, 2H), 7.19 (d,  $J = 8.5$  Hz, 2H), 3.29 (t,  $J = 7.6$  Hz, 2H), 3.05 (t,  $J = 7.5$  Hz, 2H).

$^{13}\text{C NMR}$  (101 MHz,  $\text{CDCl}_3$ )  $\delta$  198.8, 139.7, 136.7, 133.2, 131.8, 129.8, 128.6, 128.6, 128.0, 40.1, 29.3.

### 3-(4-bromophenyl)-1-phenylpropan-1-one (2f)<sup>4</sup>

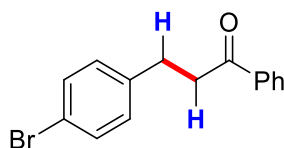

49.0 mg, 85% yield; white solid.  $^1\text{H NMR}$  (400 MHz,  $\text{CDCl}_3$ )  $\delta$  7.95 (d,  $J = 7.0$  Hz, 2H), 7.56 (t,  $J = 7.4$  Hz, 1H), 7.49 – 7.38 (m, 4H), 7.13 (d,  $J = 8.3$  Hz, 2H), 3.28 (t,  $J = 7.5$  Hz, 2H), 3.02 (t,  $J = 7.5$  Hz, 2H).

$^{13}\text{C NMR}$  (101 MHz,  $\text{CDCl}_3$ )  $\delta$  198.8, 140.2, 136.6, 133.2, 131.5, 130.2, 128.6, 128.0, 119.8, 40.0, 29.4.

### 1-phenyl-3-(4-(trifluoromethyl)phenyl)propan-1-one (2g)<sup>1</sup>

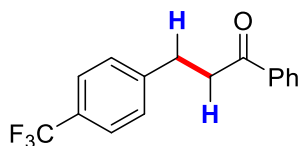

40.0 mg, 72% yield; white solid.  $^1\text{H NMR}$  (400 MHz,  $\text{CDCl}_3$ )  $\delta$  7.96 (d,  $J = 7.0$  Hz, 2H), 7.60 – 7.52 (m, 3H), 7.46 (t,  $J = 7.7$  Hz, 2H), 7.37 (d,  $J = 8.0$  Hz, 2H), 3.33 (t,  $J = 7.5$  Hz, 2H), 3.14 (t,  $J = 7.5$  Hz, 2H).



$^{13}\text{C}$  NMR (101 MHz,  $\text{CDCl}_3$ )  $\delta$  198.6, 145.4, 136.7, 133.2, 129.3, 128.8, 128.7, 128.0, 125.6(t,  $J = 272$  Hz), 125.4 (q,  $J = 3.8$  Hz), 39.8, 29.8.

$^{19}\text{F}$  NMR (376 MHz,  $\text{CDCl}_3$ )  $\delta$  -62.35.

#### 1-phenyl-3-(*m*-tolyl)propan-1-one (2h)<sup>1</sup>

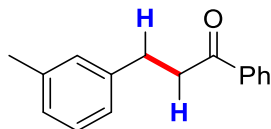

40.8 mg, 91% yield; white solid.  $^1\text{H}$  NMR (400 MHz,  $\text{CDCl}_3$ )  $\delta$  7.96 (d,  $J = 7.0$  Hz, 2H), 7.59 – 7.52 (m, 1H), 7.45 (t,  $J = 7.7$  Hz, 2H), 7.20 (t,  $J = 7.5$  Hz, 1H), 7.09 – 7.00 (m, 3H), 3.29 (t,  $J = 7.8$  Hz, 2H), 3.03 (t,  $J = 7.8$  Hz, 2H), 2.34 (s, 3H).

$^{13}\text{C}$  NMR (101 MHz,  $\text{CDCl}_3$ )  $\delta$  199.3, 141.2, 138.1, 136.8, 133.0, 129.2, 128.6, 128.4, 128.0, 126.8, 125.4, 40.5, 30.0, 21.4.

#### 1-phenyl-3-(*o*-tolyl)propan-1-one (2i)<sup>4</sup>

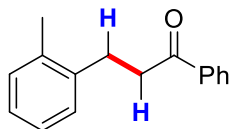

27.3 mg, 61% yield; white solid.  $^1\text{H}$  NMR (400 MHz,  $\text{CDCl}_3$ )  $\delta$  7.97 (d,  $J = 7.0$  Hz, 2H), 7.57 (t,  $J = 7.4$  Hz, 1H), 7.46 (t,  $J = 7.7$  Hz, 2H), 7.22 – 7.13 (m, 4H), 3.26 (t,  $J = 7.7$  Hz, 2H), 3.06 (t,  $J = 7.9$  Hz, 2H), 2.35 (s, 3H).

$^{13}\text{C}$  NMR (101 MHz,  $\text{CDCl}_3$ )  $\delta$  199.4, 139.4, 136.8, 136.0, 133.1, 130.3, 128.7, 128.6, 128.0, 126.3, 126.2, 39.1, 27.5, 19.4.

#### 3-phenyl-1-(*p*-tolyl)propan-1-one (2j)<sup>1</sup>

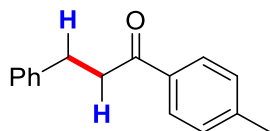

37.6 mg, 84% yield; white solid.  $^1\text{H}$  NMR (400 MHz,  $\text{CDCl}_3$ )  $\delta$  7.85 (d,  $J = 8.2$  Hz, 2H), 7.30 – 7.19 (m, 7H), 3.27(t,  $J = 7.7$  Hz, 2H), 3.05 (t,  $J = 7.7$  Hz, 2H), 2.39 (s, 3H).

$^{13}\text{C}$  NMR (101 MHz,  $\text{CDCl}_3$ )  $\delta$  203.2, 141.1, 138.0, 137.8, 131.9, 131.2, 128.4, 128.3, 128.3, 126.0, 125.6, 43.1, 30.2, 21.2.

#### 1-(4-chlorophenyl)-3-phenylpropan-1-one (2k)<sup>1</sup>

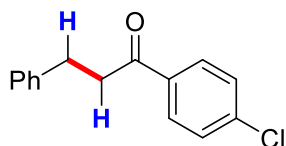

15.1 mg, 31% yield; white solid.  $^1\text{H}$  NMR (400 MHz,  $\text{CDCl}_3$ )  $\delta$  7.89 (d,  $J = 8.6$  Hz, 2H), 7.42 (d,  $J = 8.6$  Hz, 2H), 7.30 (t,  $J = 7.4$  Hz, 2H), 7.26 – 7.18 (m, 3H), 3.27 (t,  $J = 7.7$  Hz, 2H), 3.06 (t,  $J = 7.6$  Hz, 2H).

$^{13}\text{C}$  NMR (101 MHz,  $\text{CDCl}_3$ )  $\delta$  198.0, 141.1, 139.5, 135.2, 129.5, 128.9, 128.6, 128.4, 126.2, 40.4, 30.1.

#### 4-(3-phenylpropanoyl)benzonitrile (**2l**)<sup>5</sup>

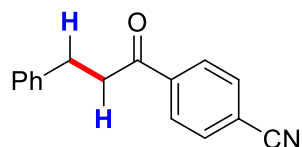

21.6 mg, 46% yield; yellow oil. <sup>1</sup>H NMR (400 MHz, CDCl<sub>3</sub>) δ 7.99 – 7.87 (m, 4H), 7.73 (s, 1H), 7.31 (t, *J* = 7.4 Hz, 2H), 7.23 (d, *J* = 8.9 Hz, 2H), 3.31 (t, *J* = 7.6 Hz, 2H), 3.07 (t, *J* = 7.6 Hz, 2H).

<sup>13</sup>C NMR (101 MHz, CDCl<sub>3</sub>) δ 201.7, 198.5, 142.8, 140.9, 139.0, 128.6, 128.4, 128.2, 127.2, 126.3, 40.8, 30.0.

#### 3-phenyl-1-(*m*-tolyl)propan-1-one (**2m**)<sup>6</sup>

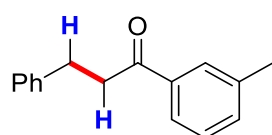

38.5 mg, 86% yield; white solid. <sup>1</sup>H NMR (400 MHz, CDCl<sub>3</sub>) δ 7.75 (d, *J* = 8.9 Hz, 2H), 7.38 – 7.26 (m, 5H), 7.25 – 7.19 (m, 2H), 3.28 (t, *J* = 7.7 Hz, 2H), 3.06 (t, *J* = 7.7 Hz, 2H), 2.39 (s, 3H).

<sup>13</sup>C NMR (101 MHz, CDCl<sub>3</sub>) δ 198.9, 143.8, 141.3, 134.3, 129.2, 128.5, 128.4, 128.1, 126.0, 40.3, 30.1, 21.6.

#### 1-(3-methoxyphenyl)-3-phenylpropan-1-one (**2n**)<sup>5</sup>

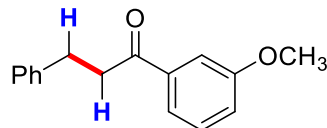

43.2 mg, 90% yield; white solid. <sup>1</sup>H NMR (400 MHz, CDCl<sub>3</sub>) δ 7.53 (d, *J* = 7.7 Hz, 1H), 7.49 (t, *J* = 2.1 Hz, 1H), 7.38 – 7.27 (m, 4H), 7.25 – 7.20 (m, 2H), 7.12 – 7.08 (m, 1H), 3.84 (s, 3H), 3.29 (t, *J* = 7.7 Hz, 2H), 3.06 (t, *J* = 7.7 Hz, 2H).

<sup>13</sup>C NMR (101 MHz, CDCl<sub>3</sub>) δ 199.0, 159.8, 141.2, 138.2, 129.6, 128.5, 128.4, 126.1, 120.6, 119.6, 112.2, 55.4, 40.5, 30.1.

#### 1-(3-fluorophenyl)-3-phenylpropan-1-one (**2o**)<sup>7</sup>

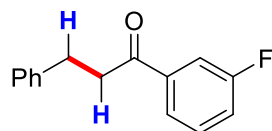

33.3 mg, 73% yield; white solid. <sup>1</sup>H NMR (400 MHz, CDCl<sub>3</sub>) δ 7.73 (d, *J* = 7.7 Hz, 1H), 7.63 (d, *J* = 9.6 Hz, 1H), 7.45 – 7.40 (m, 1H), 7.33 – 7.26 (m, 3H), 7.25 – 7.21 (m, 3H), 3.28 (t, *J* = 7.7 Hz, 2H), 3.07 (t, *J* = 7.6 Hz, 2H).

<sup>13</sup>C NMR (101 MHz, CDCl<sub>3</sub>) δ 197.9, 162.8(d, *J* = 246 Hz), 141.0, 138.9(d, *J* = 5 Hz), 130.2(d, *J* = 8 Hz), 128.4(q, *J* = 17.7 Hz), 126.2, 123.7(d, *J* = 3 Hz), 120.2, 120.0, 114.8(d, *J* = 22 Hz), 40.6, 29.9.

<sup>19</sup>F NMR (376 MHz, CDCl<sub>3</sub>) δ -111.78.

**1-(3-bromophenyl)-3-phenylpropan-1-one (2p)<sup>6</sup>**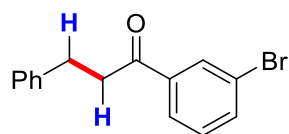

46.1 mg, 90% yield; white solid. <sup>1</sup>H NMR (400 MHz, CDCl<sub>3</sub>) δ 7.92 (s, 1H), 7.83 (d, *J* = 9.2 Hz, 1H), 7.53 (d, *J* = 8.0 Hz, 1H), 7.40 (t, *J* = 7.9 Hz, 1H), 7.33 – 7.28 (m, 2H), 7.26 – 7.18 (m, 3H), 3.28 (t, *J* = 7.6 Hz, 2H), 3.07 (t, *J* = 7.6 Hz, 2H).

<sup>13</sup>C NMR (101 MHz, CDCl<sub>3</sub>) δ 197.9, 141.0, 138.3, 134.9, 133.0, 129.9, 128.6, 128.4, 128.2, 126.2, 126.1, 40.6, 29.9.

**3-phenyl-1-(3-(trifluoromethyl)phenyl)propan-1-one (2q)<sup>8</sup>**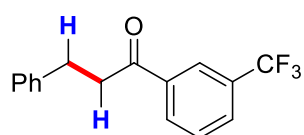

37.8 mg, 68% yield; white solid. <sup>1</sup>H NMR (400 MHz, CDCl<sub>3</sub>) δ 8.20 (s, 1H), 8.13 (d, *J* = 7.9 Hz, 1H), 7.81 (d, *J* = 7.8 Hz, 1H), 7.60 (t, *J* = 7.8 Hz, 1H), 7.31 (t, *J* = 7.4 Hz, 2H), 7.26 – 7.20 (m, 3H), 3.33 (t, *J* = 7.6 Hz, 2H), 3.09 (t, *J* = 7.6 Hz, 2H).

<sup>13</sup>C NMR (101 MHz, CDCl<sub>3</sub>) δ 197.8, 140.9, 137.3, 131.4, 131.1, 129.5 (q, *J* = 3.7 Hz), 129.3, 128.5 (t, *J* = 19 Hz), 126.3, 125.0, 124.9 (q, *J* = 3.8 Hz), 122.3, 40.6, 29.9.

<sup>19</sup>F NMR (376 MHz, CDCl<sub>3</sub>) δ -62.78.

**3-phenyl-1-(o-tolyl)propan-1-one (2r)<sup>8</sup>**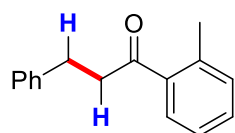

38.5 mg, 86% yield; white solid. <sup>1</sup>H NMR (400 MHz, CDCl<sub>3</sub>) δ 7.57 (d, *J* = 6.6 Hz, 1H), 7.35 – 7.25 (m, 3H), 7.23 – 7.16 (m, 5H), 3.20 (t, *J* = 7.6 Hz, 2H), 3.03 (t, *J* = 7.6 Hz, 2H), 2.46 (s, 3H).

<sup>13</sup>C NMR (101 MHz, CDCl<sub>3</sub>) δ 199.4, 141.3, 138.3, 136.8, 133.8, 128.5, 128.5, 128.4, 128.4, 126.1, 125.2, 40.5, 30.1, 21.3.

**3-(furan-2-yl)-1-phenylpropan-1-one (2s)<sup>8</sup>**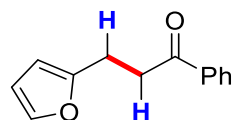

32.0 mg, 80% yield; yellow oil. <sup>1</sup>H NMR (400 MHz, CDCl<sub>3</sub>) δ 7.98 (d, *J* = 7.2 Hz, 2H), 7.57 (t, *J* = 7.4 Hz, 1H), 7.46 (t, *J* = 7.6 Hz, 2H), 7.31 (s, 1H), 6.28 (s, 1H), 6.06 (s, 1H), 3.34 (t, *J* = 7.5 Hz, 2H), 3.09 (t, *J* = 7.5 Hz, 2H).

<sup>13</sup>C NMR (101 MHz, CDCl<sub>3</sub>) δ 198.7, 154.7, 141.1, 136.7, 133.1, 128.6, 128.0, 110.2, 105.3, 36.9, 22.5.

**1-phenyl-3-(thiophen-2-yl)propan-1-one (2t)<sup>8</sup>**

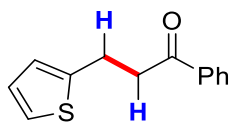

35.0 mg, 81% yield; white oil.  $^1\text{H}$  NMR (400 MHz,  $\text{CDCl}_3$ )  $\delta$  7.97 (d,  $J = 7.0$  Hz, 2H), 7.57 (t,  $J = 7.4$  Hz, 1H), 7.47 (t,  $J = 7.7$  Hz, 2H), 7.13 (d,  $J = 3.9$  Hz, 1H), 6.92 (t,  $J = 4.3$  Hz, 1H), 6.87 (d,  $J = 2.3$  Hz, 1H), 3.37 (t,  $J = 7.0$  Hz, 2H), 3.30 (t,  $J = 6.8$  Hz, 2H).

$^{13}\text{C}$  NMR (101 MHz,  $\text{CDCl}_3$ )  $\delta$  198.6, 143.9, 136.7, 133.2, 128.6, 128.0, 126.8, 124.7, 123.4, 40.5, 24.2.

#### 1-(furan-2-yl)-3-phenylpropan-1-one (2u)<sup>8</sup>

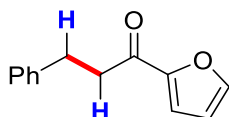

28.8 mg, 72% yield; white oil.  $^1\text{H}$  NMR (400 MHz,  $\text{CDCl}_3$ )  $\delta$  7.55 (s, 1H), 7.29 (t,  $J = 7.4$  Hz, 2H), 7.25 – 7.18 (m, 3H), 7.16 (d,  $J = 3.6$  Hz, 1H), 6.51 (dd,  $J = 3.6, 1.7$  Hz, 1H), 3.15 (t,  $J = 7.3$  Hz, 2H), 3.04 (t,  $J = 7.7$  Hz, 2H).

$^{13}\text{C}$  NMR (101 MHz,  $\text{CDCl}_3$ )  $\delta$  188.4, 152.5, 146.3, 140.9, 128.4, 128.3, 126.1, 117.0, 112.1, 40.1, 29.8.

#### 3-phenyl-1-(thiophen-2-yl)propan-1-one (2v)<sup>8</sup>

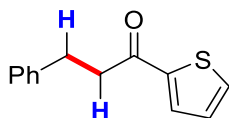

30.2 mg, 70% yield; yellow oil.  $^1\text{H}$  NMR (400 MHz,  $\text{CDCl}_3$ )  $\delta$  7.69 (d,  $J = 3.8$  Hz, 1H), 7.63 (d,  $J = 5.0$  Hz, 1H), 7.29 (t,  $J = 7.4$  Hz, 2H), 7.26 – 7.18 (m, 3H), 7.11 (t,  $J = 7.3$  Hz, 1H), 3.24 (t,  $J = 7.9$  Hz, 2H), 3.07 (t,  $J = 7.7$  Hz, 2H).

$^{13}\text{C}$  NMR (101 MHz,  $\text{CDCl}_3$ )  $\delta$  192.2, 144.1, 141.0, 133.6, 131.8, 128.5, 128.4, 128.1, 126.2, 41.1, 30.3.

#### 1-(naphthalen-2-yl)-3-phenylpropan-1-one (2w)<sup>5</sup>

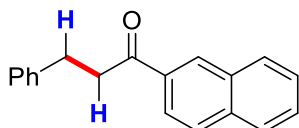

40.6 mg, 78% yield; white solid.  $^1\text{H}$  NMR (400 MHz,  $\text{CDCl}_3$ )  $\delta$  8.45 (s, 1H), 8.03 (d,  $J = 8.6$  Hz, 1H), 7.95 – 7.83 (m, 3H), 7.62 – 7.50 (m, 2H), 7.34 – 7.27 (m, 4H), 7.24 – 7.21 (m, 1H), 3.43 (t,  $J = 7.7$  Hz, 2H), 3.13 (t,  $J = 7.7$  Hz, 2H).

$^{13}\text{C}$  NMR (101 MHz,  $\text{CDCl}_3$ )  $\delta$  199.1, 141.3, 135.5, 134.1, 132.5, 129.7, 129.5, 128.5, 128.4, 128.4, 127.7, 126.7, 126.1, 123.8, 40.5, 30.2.

#### 1-(naphthalen-1-yl)-3-phenylpropan-1-one (2x)<sup>8</sup>

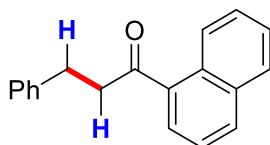

32.8 mg, 63% yield; white solid.  $^1\text{H}$  NMR (400 MHz,  $\text{CDCl}_3$ )  $\delta$  8.55 (d,  $J = 7.8$  Hz, 1H), 7.96 (d,  $J = 8.2$  Hz, 1H), 7.86 (d,  $J = 8.0$  Hz, 1H), 7.80 (d,  $J = 7.2$  Hz, 1H), 7.54 (m, 2H), 7.45 (t,  $J = 7.7$  Hz, 1H), 7.31 – 7.26 (m, 3H), 7.25 – 7.17 (m, 2H), 3.37 (t,  $J = 7.6$  Hz, 2H), 3.13 (t,  $J = 7.6$  Hz, 2H).

$^{13}\text{C}$  NMR (101 MHz,  $\text{CDCl}_3$ )  $\delta$  203.5, 141.1, 135.9, 133.9, 132.6, 130.1, 128.5, 128.4, 128.4, 127.8, 127.4, 126.4, 126.1, 125.7, 124.3, 43.8, 30.5.

### 3-(naphthalen-2-yl)-1-phenylpropan-1-one (2y)<sup>8</sup>

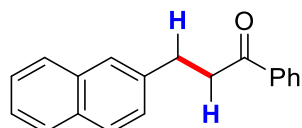

44.2 mg, 85% yield; white solid.  $^1\text{H}$  NMR (400 MHz,  $\text{CDCl}_3$ )  $\delta$  8.04 (d,  $J = 8.2$  Hz, 1H), 7.94 (d,  $J = 7.0$  Hz, 2H), 7.86 (d,  $J = 7.7$  Hz, 1H), 7.73 (t,  $J = 4.8$  Hz, 1H), 7.54 – 7.45 (m, 3H), 7.45 – 7.36 (m, 4H), 3.53 (t,  $J = 7.4$  Hz, 2H), 3.41 (t,  $J = 7.3$  Hz, 2H).

$^{13}\text{C}$  NMR (101 MHz,  $\text{CDCl}_3$ )  $\delta$  199.2, 137.3, 136.7, 133.9, 133.1, 131.6, 128.9, 128.6, 128.0, 127.0, 126.1, 126.0, 125.6, 125.6, 123.5, 39.7, 27.1.

### 1-phenyl-3-(4-vinylphenyl)propan-1-one (2z)<sup>9</sup>

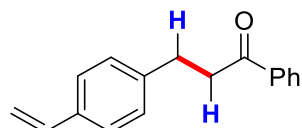

17.9 mg, 38% yield; yellow oil.  $^1\text{H}$  NMR (400 MHz,  $\text{CDCl}_3$ )  $\delta$  7.95 (d,  $J = 7.7$  Hz, 2H), 7.55 (t,  $J = 7.4$  Hz, 1H), 7.45 (t,  $J = 7.6$  Hz, 2H), 7.35 (d,  $J = 7.8$  Hz, 2H), 7.21 (d,  $J = 7.8$  Hz, 2H), 6.69 (dd,  $J = 17.6$ , 10.8 Hz, 1H), 5.71 (d,  $J = 17.6$  Hz, 1H), 5.20 (d,  $J = 10.9$  Hz, 1H), 3.29 (t,  $J = 7.7$  Hz, 2H), 3.06 (t,  $J = 7.7$  Hz, 2H).

$^{13}\text{C}$  NMR (101 MHz,  $\text{CDCl}_3$ )  $\delta$  199.1, 141.0, 136.8, 136.5, 135.6, 133.1, 128.6, 128.0, 126.3, 113.2, 40.3, 29.8.

### (S)-1,3-diphenylbutan-1-one (2ab)<sup>1</sup>

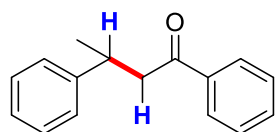

26.0 mg, 58% yield; white solid.  $^1\text{H}$  NMR (400 MHz,  $\text{CDCl}_3$ )  $\delta$  7.93 (d,  $J = 7.0$  Hz, 2H), 7.55 (t,  $J = 7.4$  Hz, 1H), 7.44 (t,  $J = 7.7$  Hz, 2H), 7.33 – 7.26 (m, 4H), 7.20 (m,  $J = 1$  Hz), 3.51 (dq,  $J = 13.9$ , 6.9 Hz, 1H), 3.30 (dd,  $J = 16.5$ , 5.7 Hz, 1H), 3.19 (dd,  $J = 16.5$ , 8.3 Hz, 1H), 1.34 (d,  $J = 6.9$  Hz, 3H).

$^{13}\text{C}$  NMR (101 MHz,  $\text{CDCl}_3$ )  $\delta$  199.1, 146.6, 137.2, 133.0, 128.6, 128.5, 128.1, 126.8, 126.3, 47.0, 35.6, 21.9.

### 1-phenylbutan-1-one (2ac, CAS:495-40-9)<sup>10</sup>

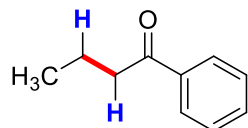

17.8 mg, 60% yield; colorless oil.  $^1\text{H NMR}$  (400 MHz,  $\text{CDCl}_3$ )  $\delta$  7.97 (d,  $J = 7.0$  Hz, 2H), 7.56 (t,  $J = 7.4$  Hz, 1H), 7.46 (t,  $J = 7.5$  Hz, 2H), 2.95 (t,  $J = 7.3$  Hz, 2H), 1.83 – 1.72 (m, 2H), 1.01 (t,  $J = 7.4$  Hz, 3H).

$^{13}\text{C NMR}$  (101 MHz,  $\text{CDCl}_3$ )  $\delta$  200.5, 137.1, 132.9, 128.5, 128.0, 40.5, 17.7, 13.9.

**4-phenylbutan-2-one (2ad, CAS: 2550-26-7)<sup>1</sup>**

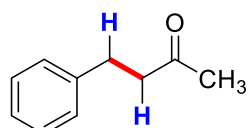

18.4 mg, 62% yield; colorless oil.  $^1\text{H NMR}$  (400 MHz,  $\text{CDCl}_3$ )  $\delta$  7.26 (t,  $J = 7.5$  Hz, 2H), 7.18 (t,  $J = 7.5$  Hz, 3H), 2.89 (t,  $J = 7.6$  Hz, 2H), 2.76 (t,  $J = 7.4$  Hz, 2H), 2.14 (s, 3H).

$^{13}\text{C NMR}$  (101 MHz,  $\text{CDCl}_3$ )  $\delta$  208.0, 140.9, 128.4, 128.2, 126.1, 45.1, 30.0, 29.7.

**3-phenylpropanenitrile (2ae, CAS: 645-59-0)<sup>11</sup>**

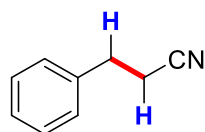

8.4 mg, 32% yield; colorless oil.  $^1\text{H NMR}$  (400 MHz,  $\text{CDCl}_3$ )  $\delta$  7.38 – 7.30 (m, 2H), 7.28 (d,  $J = 7.3$  Hz, 1H), 7.23 (d,  $J = 7.0$  Hz, 3H), 2.96 (t,  $J = 7.4$  Hz, 2H), 2.62 (t,  $J = 7.4$  Hz, 2H).

$^{13}\text{C NMR}$  (101 MHz,  $\text{CDCl}_3$ )  $\delta$  138.0, 128.8, 128.2, 127.2, 119.1, 31.5, 19.3.

**Cyclohexanone (2af, CAS: 108-94-1)<sup>12</sup>**

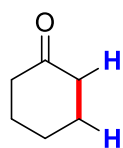

2.9 mg, 15% yield; colorless oil.  $^1\text{H NMR}$  (400 MHz,  $\text{CDCl}_3$ )  $\delta$  2.34 (t,  $J = 6.6$  Hz, 4H), 1.87 (t,  $J = 6.2$  Hz, 4H), 1.75 – 1.70 (m, 2H).

$^{13}\text{C NMR}$  (101 MHz,  $\text{CDCl}_3$ )  $\delta$  212.2, 41.9, 27.0, 25.0.

**ethane-1,1-diylidibenzene (2ag, CAS: 612-00-0)<sup>13</sup>**

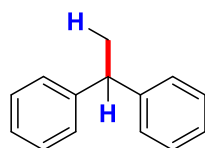

26.2 mg, 72% yield; colorless solid.  $^1\text{H NMR}$  (400 MHz,  $\text{CDCl}_3$ )  $\delta$  7.32 – 7.25 (m, 4H), 7.25 – 7.14 (m, 6H), 4.15 (q,  $J = 7.2$  Hz, 1H), 1.64 (d,  $J = 5.4$  Hz, 3H).

$^{13}\text{C NMR}$  (101 MHz,  $\text{CDCl}_3$ )  $\delta$  146.3, 128.3, 127.6, 126.0, 44.7, 21.8.

**(E)-1,2-diphenylethene (2ah, CAS: 103-30-0)**<sup>3</sup>

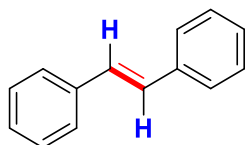

21.2 mg, 59% yield; white solid. <sup>1</sup>H NMR (400 MHz, CDCl<sub>3</sub>) δ 7.52 (d, *J* = 7.0 Hz, 4H), 7.36 (t, *J* = 7.6 Hz, 4H), 7.25 (d, *J* = 7.5 Hz, 2H), 7.11 (s, 2H).

<sup>13</sup>C NMR (101 MHz, CDCl<sub>3</sub>) δ 137.3, 128.7, 127.6, 126.5.

**(E)-4-phenylbut-3-en-2-one (1ad, CAS: 1896-62-4)**<sup>14</sup>

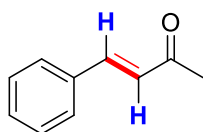

9.6 mg, 33% yield; colorless oil. <sup>1</sup>H NMR (400 MHz, CDCl<sub>3</sub>) δ 7.59 – 7.49 (m, 3H), 7.43 – 7.38 (m, 3H), 6.72 (d, *J* = 16.3 Hz, 1H), 2.39 (s, 3H).

<sup>13</sup>C NMR (101 MHz, CDCl<sub>3</sub>) δ 198.5, 143.5, 134.4, 130.5, 129.0, 128.2, 127.1, 27.5.

**ethyl cinnamate (2aj, CAS: 4192-77-2)**<sup>15</sup>

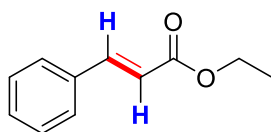

20.1 mg, 57% yield; colorless oil. <sup>1</sup>H NMR (400 MHz, CDCl<sub>3</sub>) δ 7.68 (d, *J* = 16.0 Hz, 1H), 7.51 (dd, *J* = 6.6, 3.0 Hz, 2H), 7.40 – 7.34 (m, 3H), 6.43 (d, *J* = 16.0 Hz, 1H), 4.26 (q, *J* = 7.1 Hz, 2H), 1.33 (t, *J* = 7.1 Hz, 3H).

<sup>13</sup>C NMR (101 MHz, CDCl<sub>3</sub>) δ 167.0, 144.6, 134.4, 130.2, 128.8, 128.0, 118.2, 60.5, 14.3.

**ethyl 3-phenylpropanoate (2aj)', CAS: 2021-28-5)**<sup>15</sup>

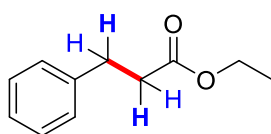

4.6 mg, 13% yield; faint yellow solid. <sup>1</sup>H NMR (400 MHz, CDCl<sub>3</sub>) δ 7.32 – 7.26 (m, 2H), 7.23 – 7.17 (m, 3H), 4.13 (q, *J* = 7.1 Hz, 2H), 2.95 (t, *J* = 7.9 Hz, 2H), 2.62 (t, *J* = 7.8 Hz, 2H), 1.23 (t, *J* = 7.2 Hz, 3H).

<sup>13</sup>C NMR (101 MHz, CDCl<sub>3</sub>) δ 172.9, 140.6, 128.5, 128.3, 126.2, 60.4, 35.9, 31.0, 14.2.

**1,4-diphenylbutan-1-one (2ak, CAS: 5407-91-0)**<sup>16</sup>

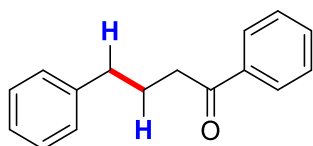

30.0 mg, 67% yield; faint yellow solid.  $^1\text{H}$  NMR (400 MHz,  $\text{CDCl}_3$ )  $\delta$  7.92 (d,  $J = 7.1$  Hz, 2H), 7.55 (t,  $J = 7.4$  Hz, 1H), 7.45 (t,  $J = 7.7$  Hz, 2H), 7.33 – 7.27 (m, 2H), 7.24 – 7.16 (m, 3H), 2.98 (t,  $J = 7.3$  Hz, 2H), 2.73 (t,  $J = 7.6$  Hz, 2H), 2.09 (p,  $J = 7.4$  Hz, 2H).

$^{13}\text{C}$  NMR (101 MHz,  $\text{CDCl}_3$ )  $\delta$  200.1, 141.7, 137.0, 132.9, 128.5, 128.5, 128.4, 128.0, 125.9, 37.7, 35.2, 25.7.

## 6. Reference

1. B. Huang, Y. Li, C. Yang and W. Xia, Electrochemical 1,4-reduction of  $\alpha,\beta$ -unsaturated ketones with methanol and ammonium chloride as hydrogen sources, *Chem. Commun.* 2019, **55**, 6731-6734.
2. P. S. Akula, B.-C. Hong and G.-H. Lee, *Org. Lett.* 2018, **20**, 7835-7839.
3. H.-C. Li, C. An, G. Wu, G.-X. Li, X.-B. Huang, W.-X. Gao, J.-C. Ding, Y.-B. Zhou, M.-C. Liu and H.-Y. Wu, Transition-Metal-Free Highly Chemoselective and Stereoselective Reduction with Se/DMF/ $\text{H}_2\text{O}$  System, *Org. Lett.* 2018, **20**, 5573-5577.
4. S.-j. Chen, G.-p. Lu and C. Cai, A base-controlled chemoselective transfer hydrogenation of  $\alpha,\beta$ -unsaturated ketones catalyzed by  $[\text{IrCp}^*\text{Cl}_2]_2$  with 2-propanol, *RSC Adv.* 2015, **5**, 13208-13211.
5. J. Das, M. Vellakkaran and D. Banerjee, Nickel-Catalyzed Alkylation of Ketone Enolates: Synthesis of Monoselective Linear Ketones, *J. Org. Chem.* 2019, **84**, 769-779.
6. M.-J. Zhang, H.-X. Li, D. J. Young, H.-Y. Li and J.-P. Lang, Reaction condition controlled nickel(ii)-catalyzed C–C cross-coupling of alcohols, *Org. Biomol. Chem.* 2019, **17**, 3567-3574.
7. R. Wang, J. Ma and F. Li, Synthesis of  $\alpha$ -Alkylated Ketones via Tandem Acceptorless Dehydrogenation/ $\alpha$ -Alkylation from Secondary and Primary Alcohols Catalyzed by Metal–Ligand Bifunctional Iridium Complex  $[\text{Cp}^*\text{Ir}(2,2'\text{-bpyO})(\text{H}_2\text{O})]$ , *J. Org. Chem.* 2015, **80**, 10769-10776.
8. X.-B. Lan, Z. Ye, M. Huang, J. Liu, Y. Liu and Z. Ke, Nonbifunctional Outer-Sphere Strategy Achieved Highly Active  $\alpha$ -Alkylation of Ketones with Alcohols by N-Heterocyclic Carbene Manganese (NHC-Mn), *Org. Lett.* 2019, **21**, 8065-8070.
9. W. Ding and Q. Song, Chemoselective catalytic reduction of conjugated  $\alpha,\beta$ -unsaturated ketones to saturated ketones via a hydroboration/protodeboronation strategy, *Org. Chem. Front.* 2016, **3**, 14-18.
10. Y. Nishiyama, M. Yoshida, S. Ohkawa and S. Hamanaka, New agents for the selective reduction of the carbon-carbon double bond of  $\alpha,\beta$ -unsaturated carbonyl compounds, *J. Org. Chem.* 1991, **56**, 6720-6722.
11. M. Szostak, B. Sautier, M. Spain and D. J. Procter, Electron Transfer Reduction of Nitriles Using  $\text{SmI}_2\text{-Et}_3\text{N-H}_2\text{O}$ : Synthetic Utility and Mechanism, *Org. Lett.* 2014, **16**, 1092-1095.
12. T. N. Gieshoff, M. Villa, A. Welther, M. Plois, U. Chakraborty, R. Wolf and A. Jacobi von Wangelin, Iron-catalyzed olefin hydrogenation at 1 bar  $\text{H}_2$  with a  $\text{FeCl}_3\text{-LiAlH}_4$  catalyst, *Green Chem.* 2015, **17**, 1408-1413.
13. J. A. Murphy, J. Garnier, S. R. Park, F. Schoenebeck, S.-z. Zhou and A. T. Turner, Super-Electron Donors: Bis-pyridinylidene Formation by Base Treatment of Pyridinium Salts, *Org. Lett.* 2008, **10**, 1227-1230.
14. K. T. Venkateswara Rao, P. S. Sai Prasad and N. Lingaiah, Solvent-free hydration of alkynes over a heterogeneous silver exchanged silicotungstic acid catalyst, *Green Chem.* 2012, **14**, 1507-



1514.

15. F. Mäsing, H. Nüsse, J. Klingauf and A. Studer, Light Mediated Preparation of Palladium Nanoparticles as Catalysts for Alkyne cis-Semihydrogenation, *Org. Lett.* 2017, **19**, 2658-2661.
16. M. Kaur, N. U Din Reshi, K. Patra, A. Bhattacherya, S. Kunnikuruvaan and J. K. Bera, A Proton-Responsive Pyridyl(benzamide)-Functionalized NHC Ligand on Ir Complex for Alkylation of Ketones and Secondary Alcohols, *Chem. Eur. J.* 2021, **27**, 10737-10748.

## 7. NMR Spectra for the compounds prepared

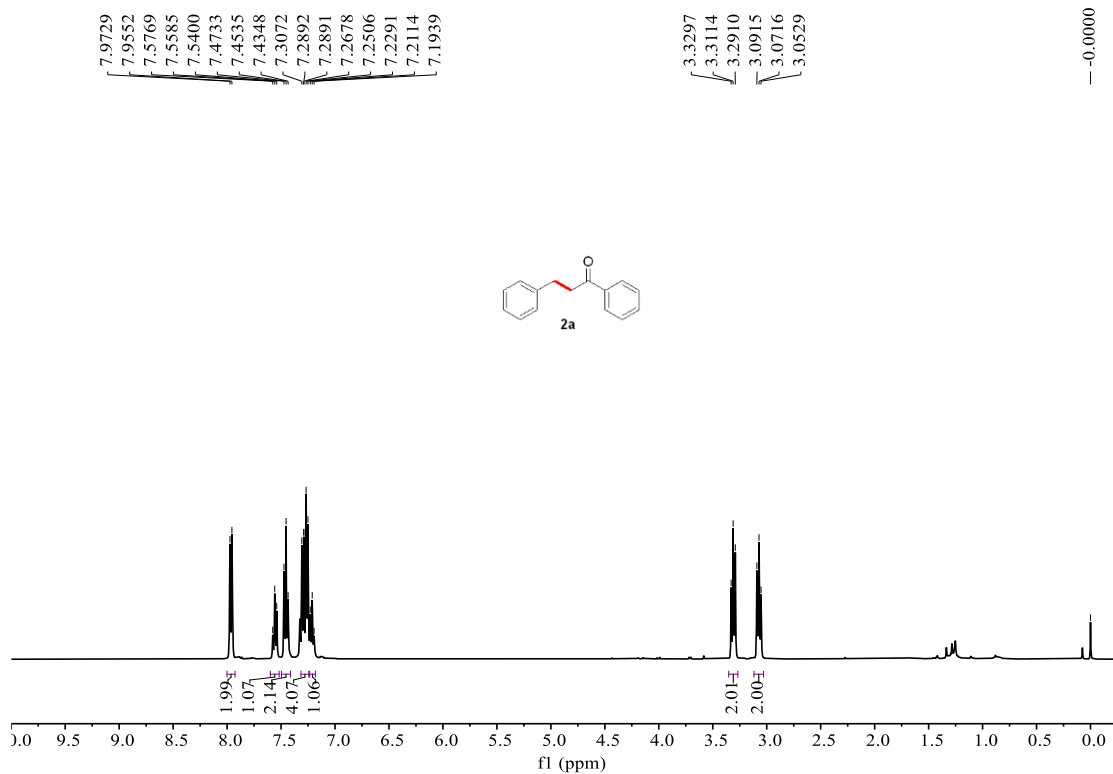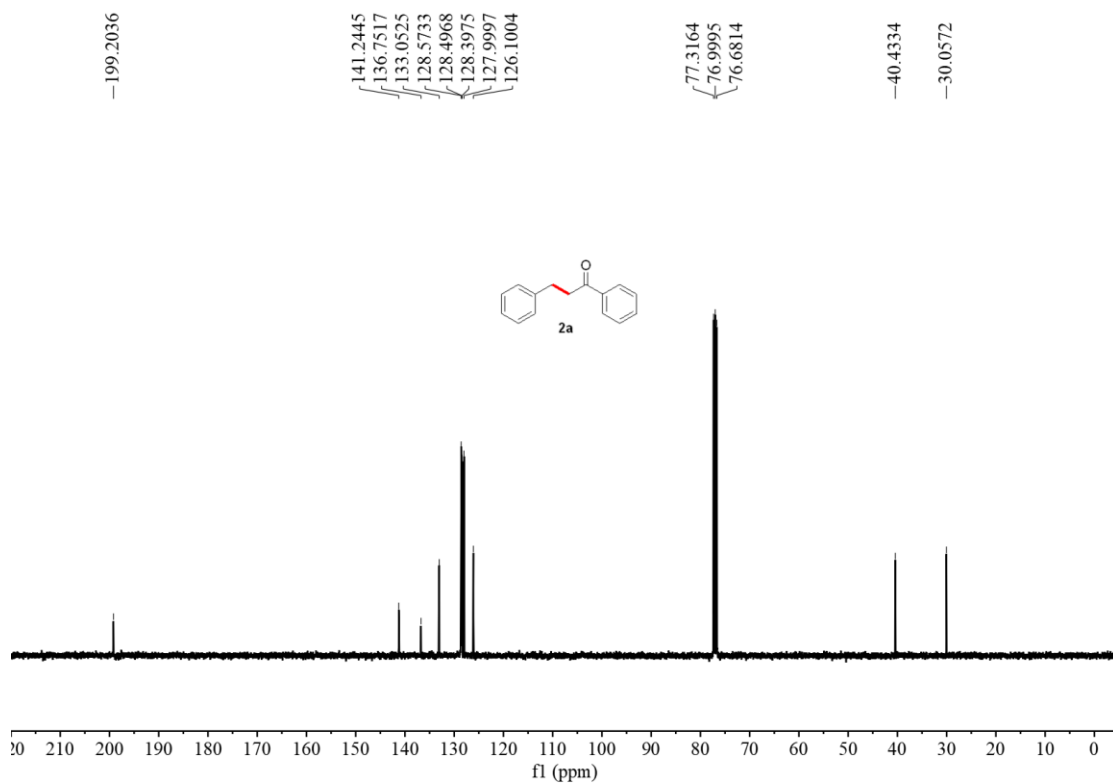

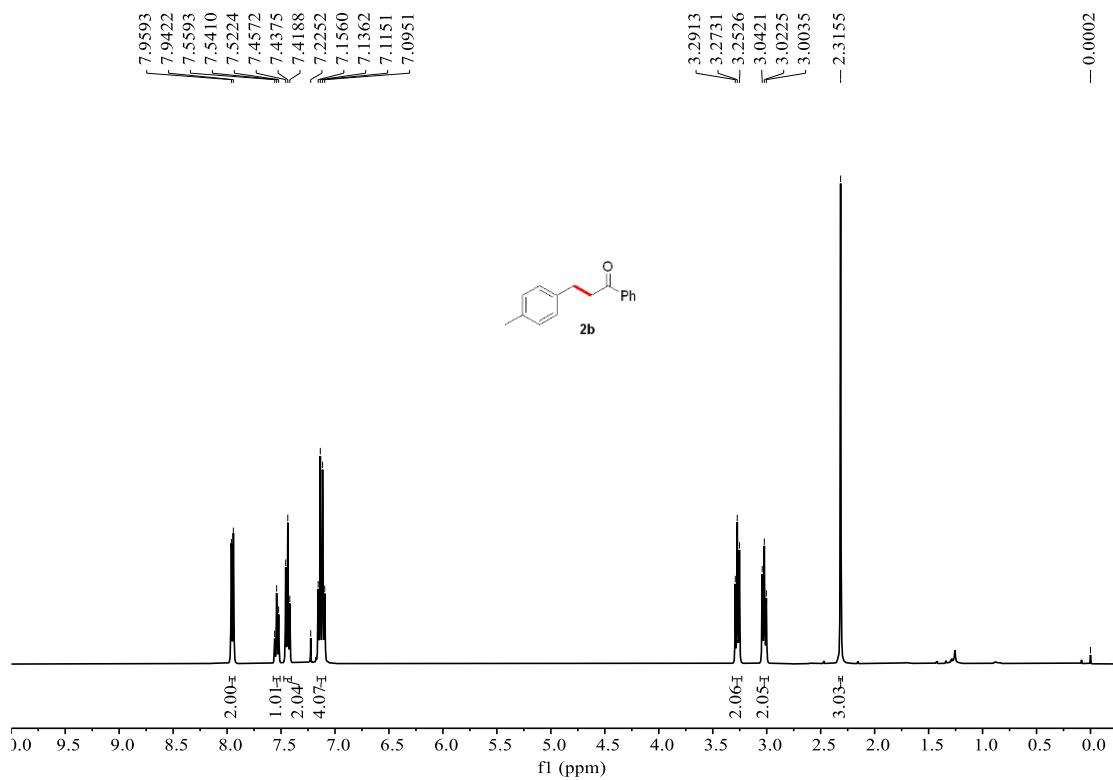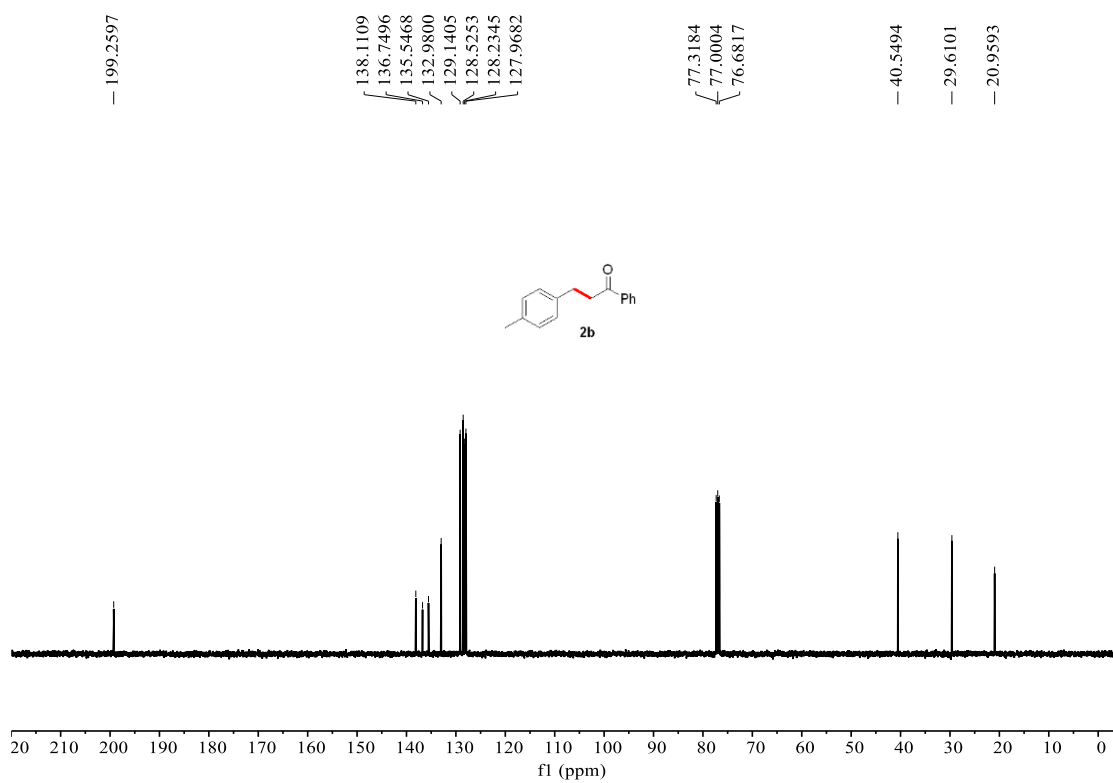

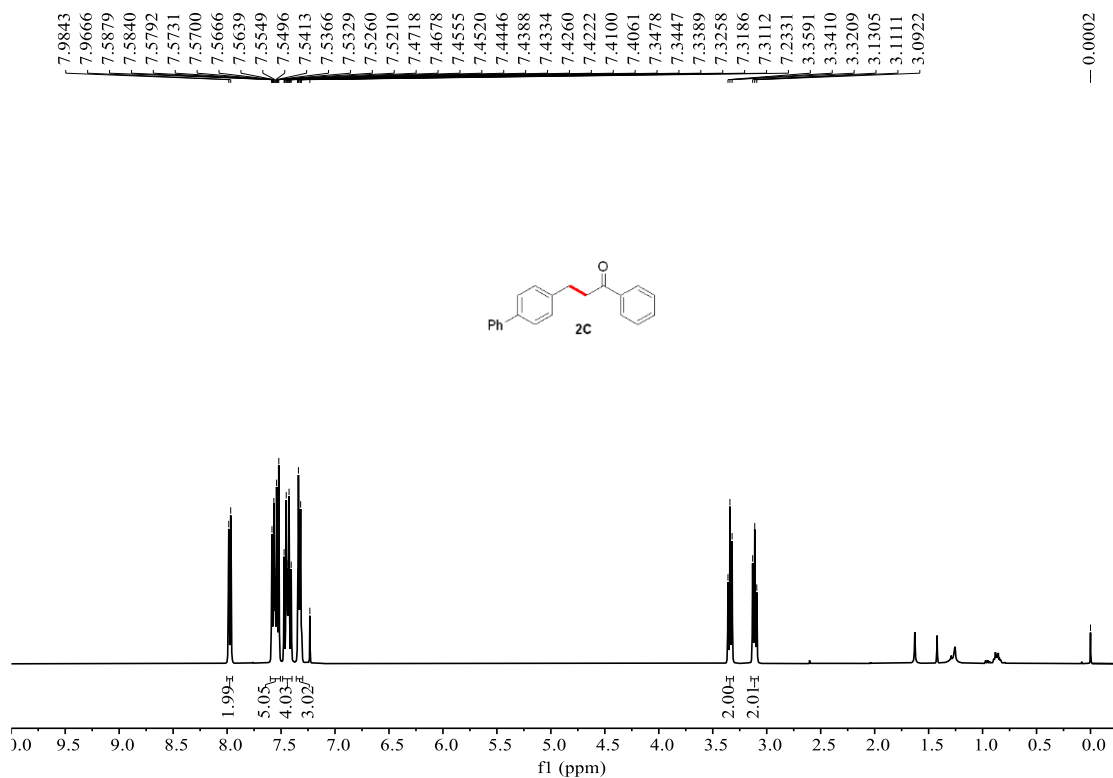

— 0.0002

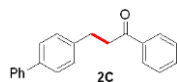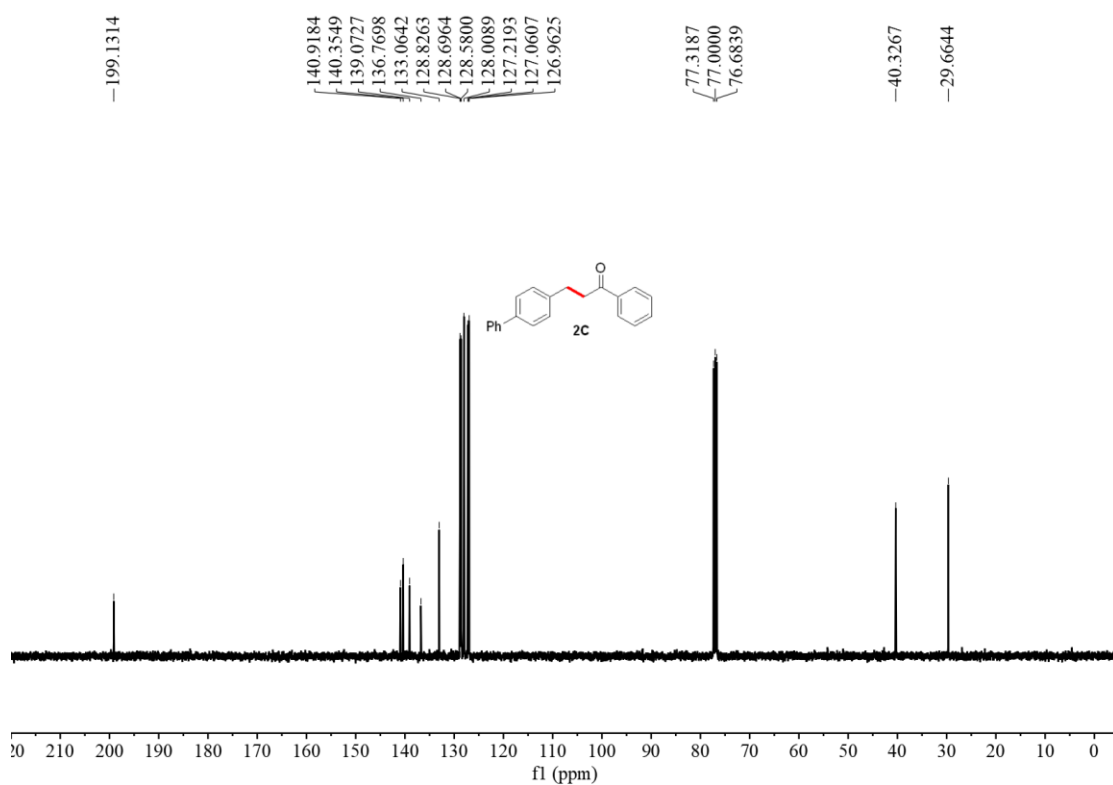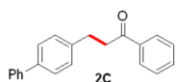

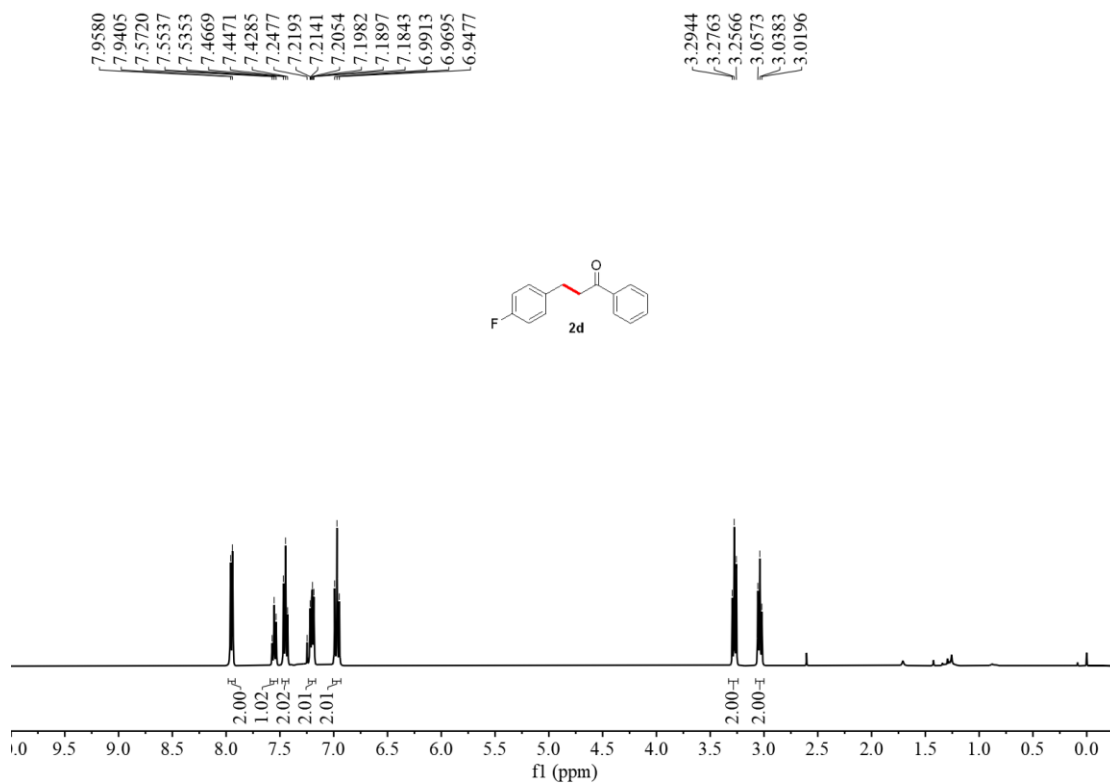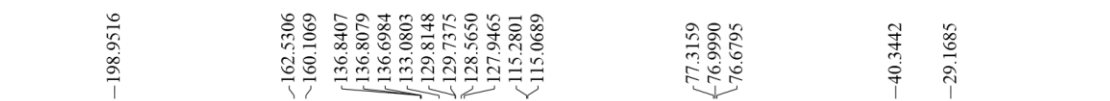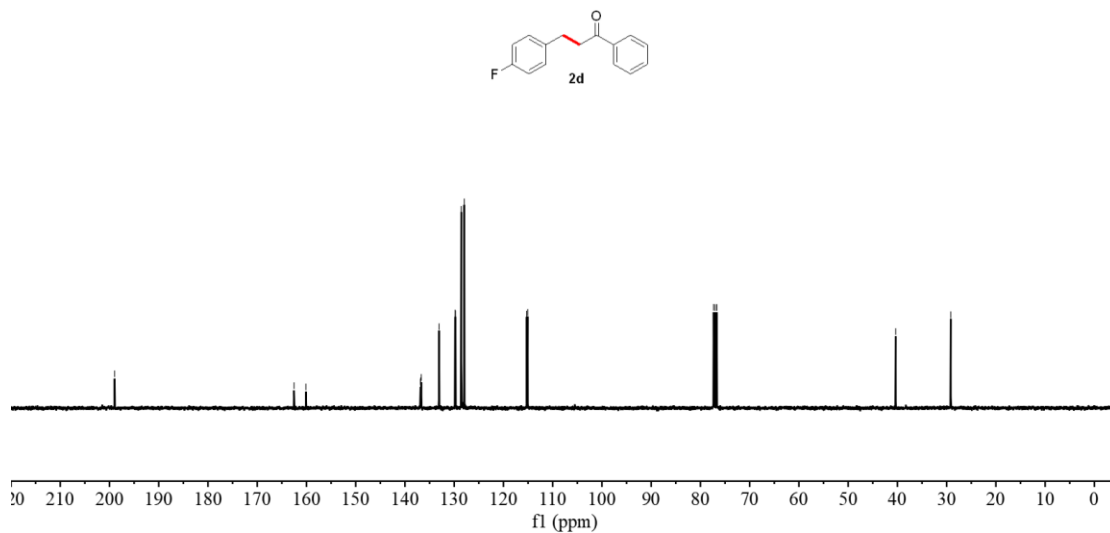

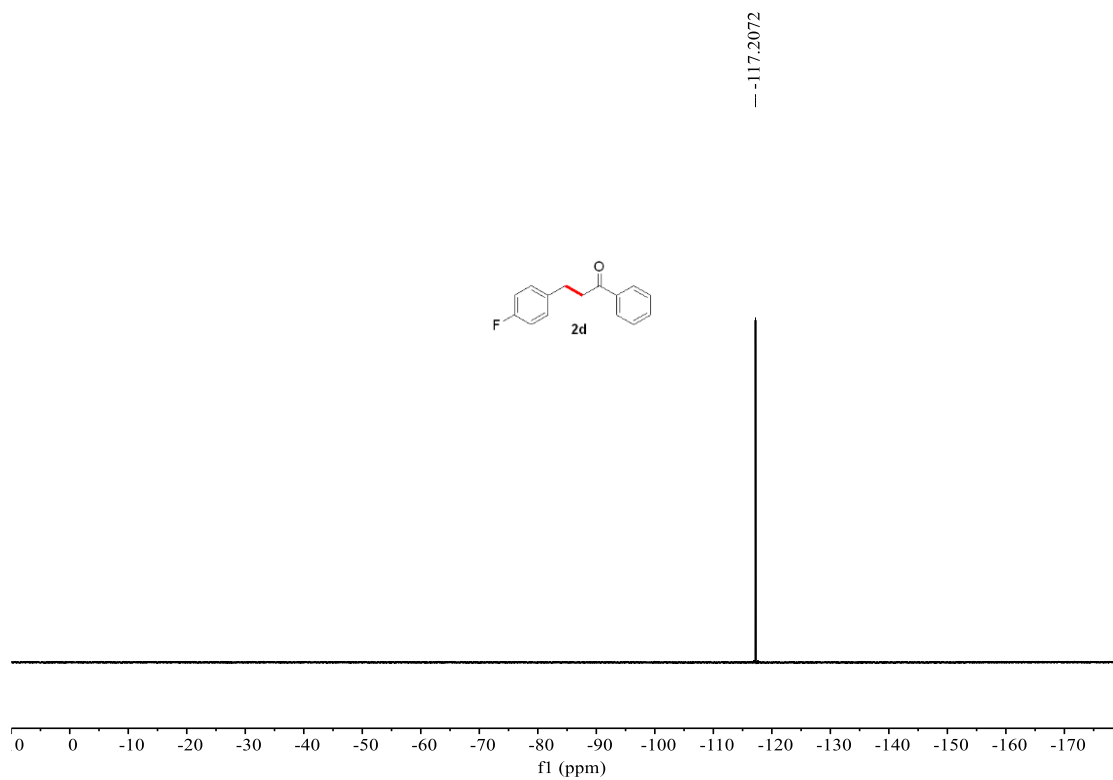

7.9642  
7.9441  
7.5890  
7.5681  
7.5489  
7.4799  
7.4606  
7.4416  
7.2720  
7.2603  
7.2511  
7.1985  
7.1773

3.3069  
3.2883  
3.2692  
3.0646  
3.0457  
3.0269

-0.0005

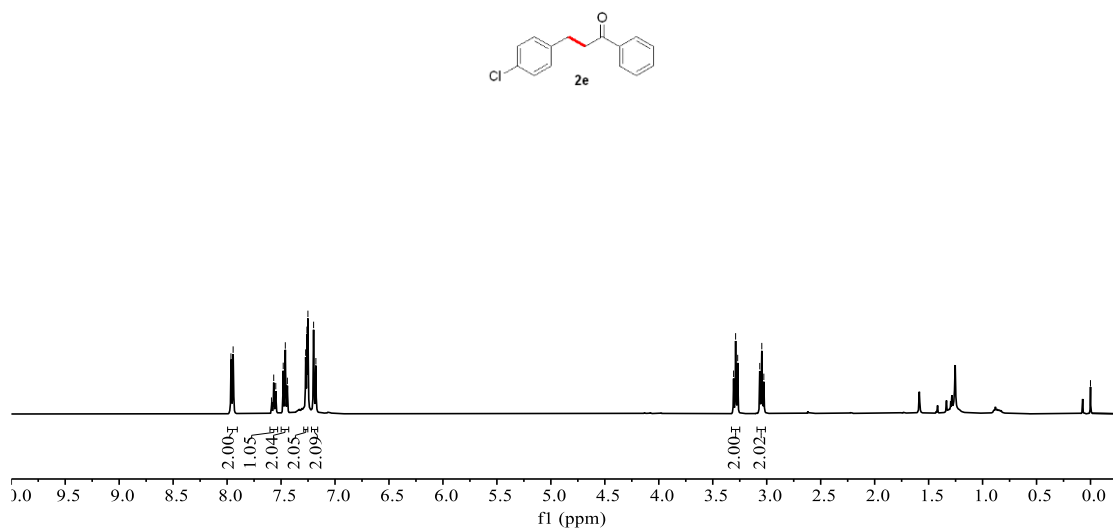

2.00H  
1.05H  
2.04H  
2.05H  
2.09H

2.00H  
2.02H

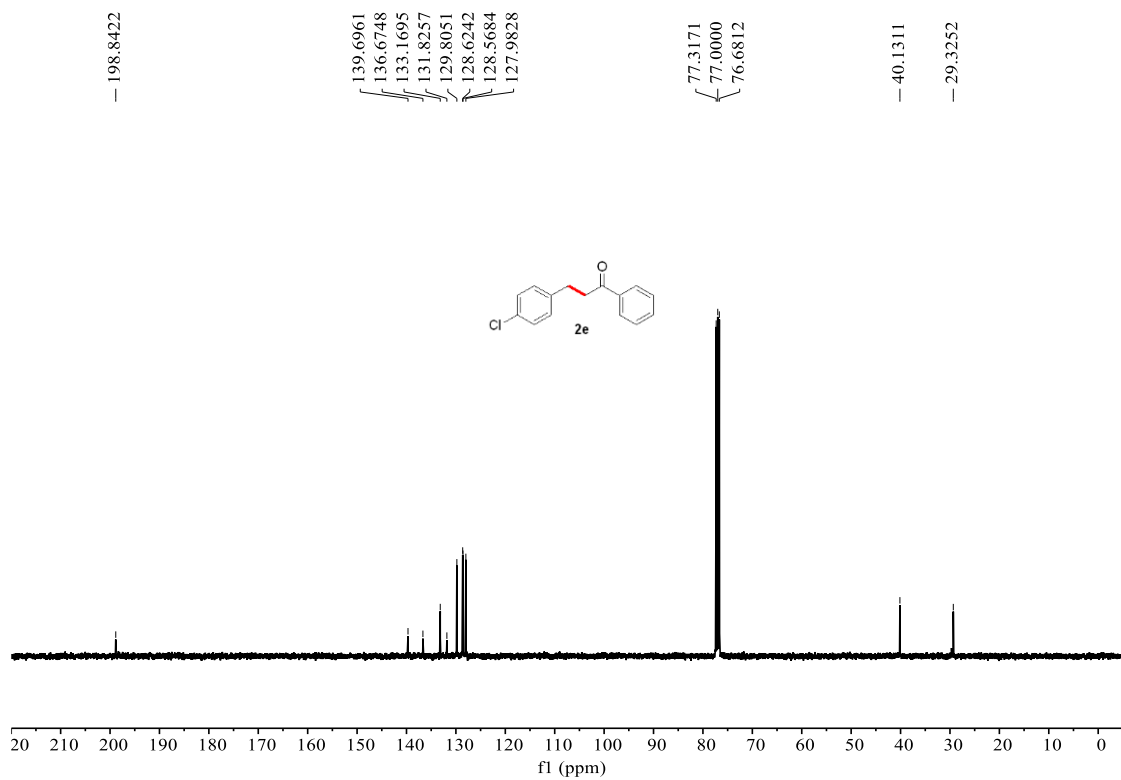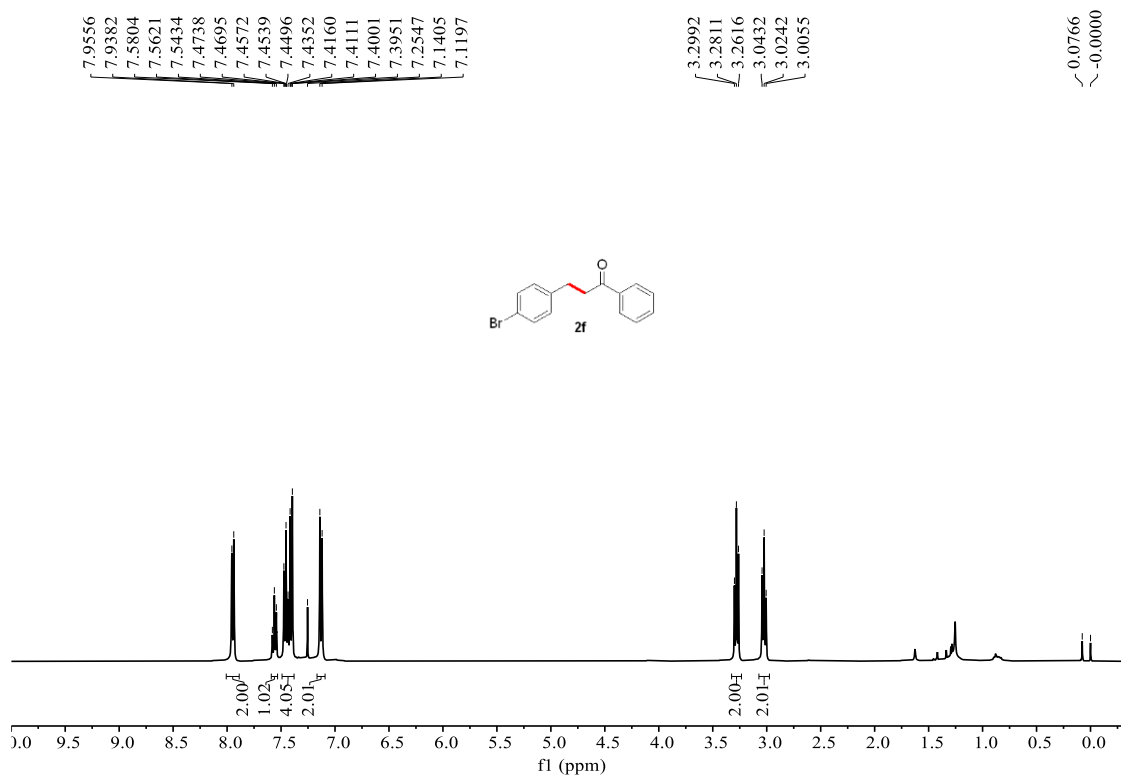

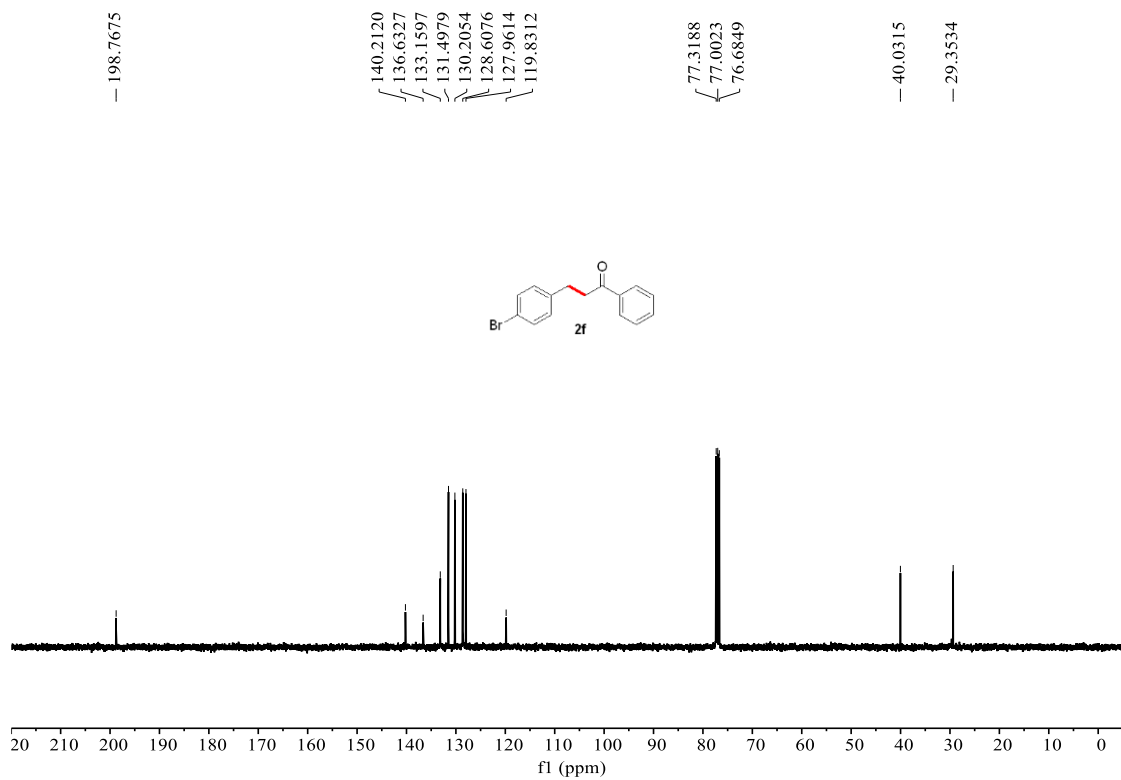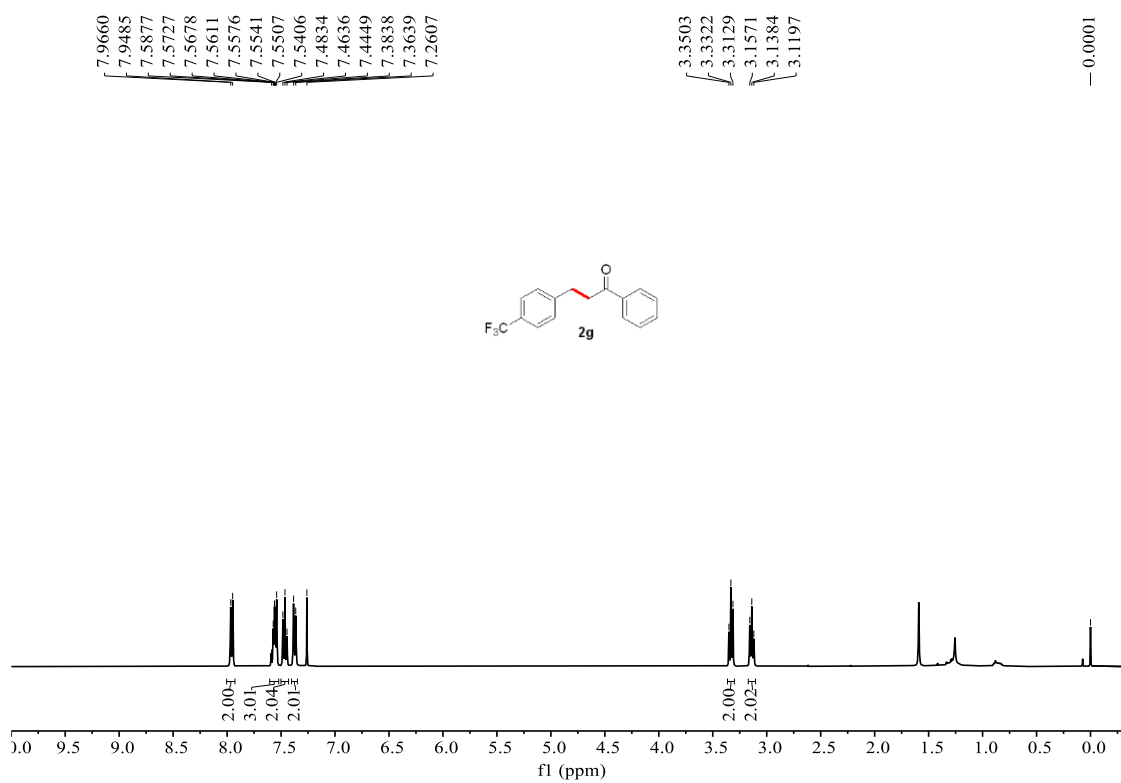



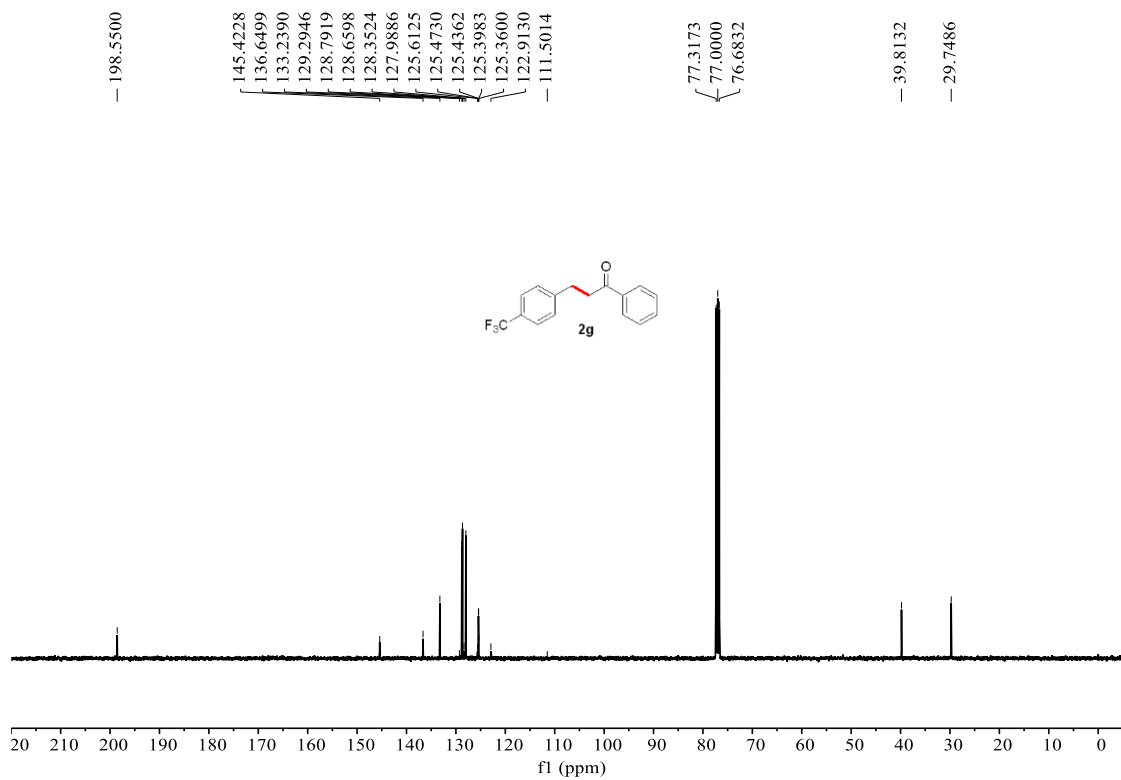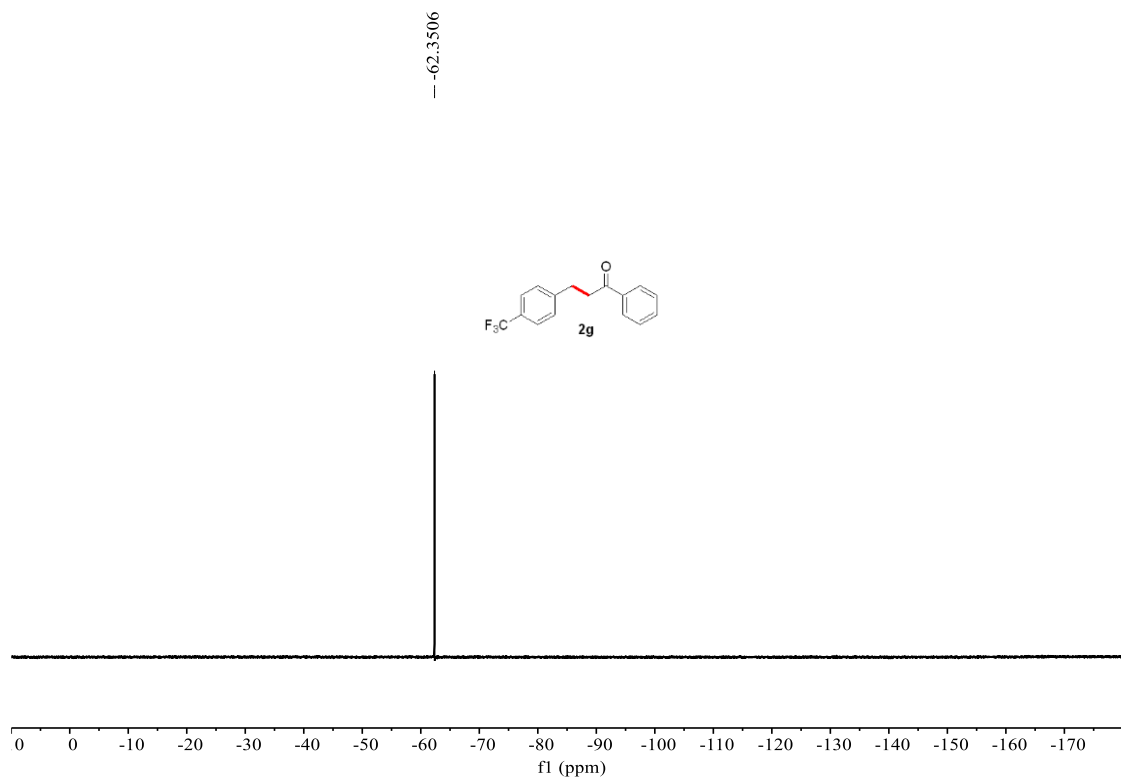

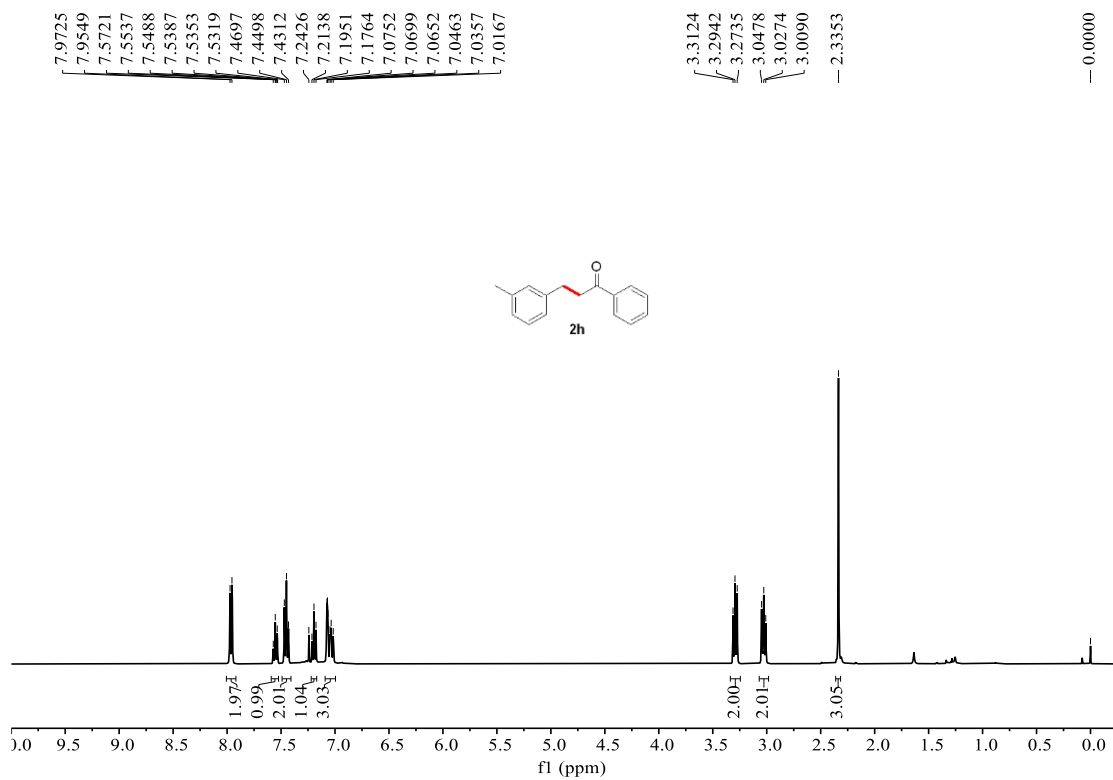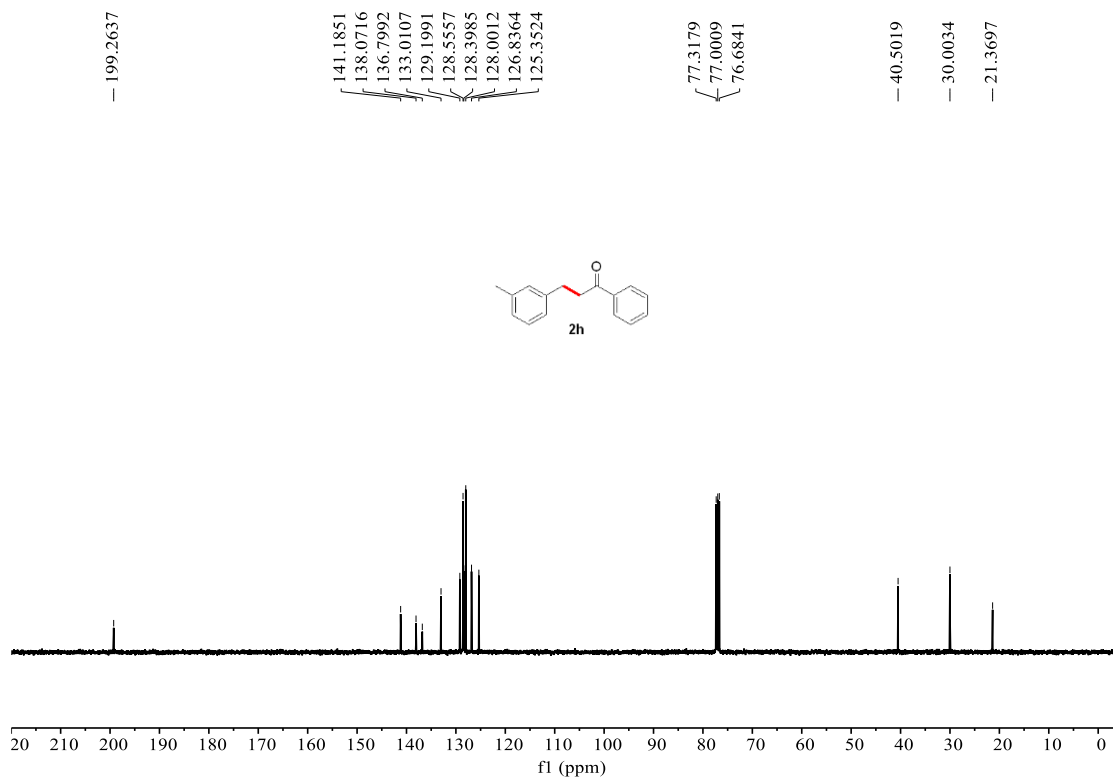

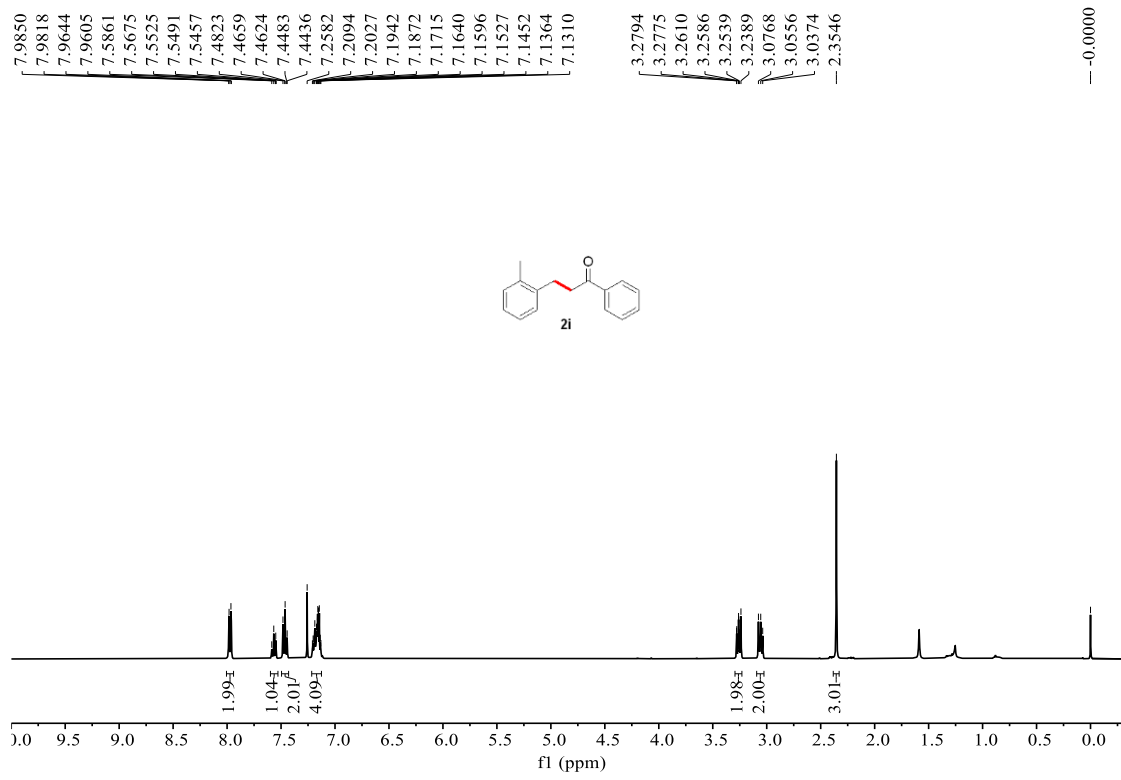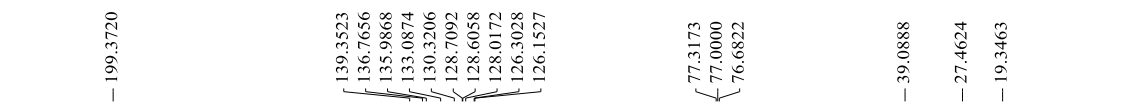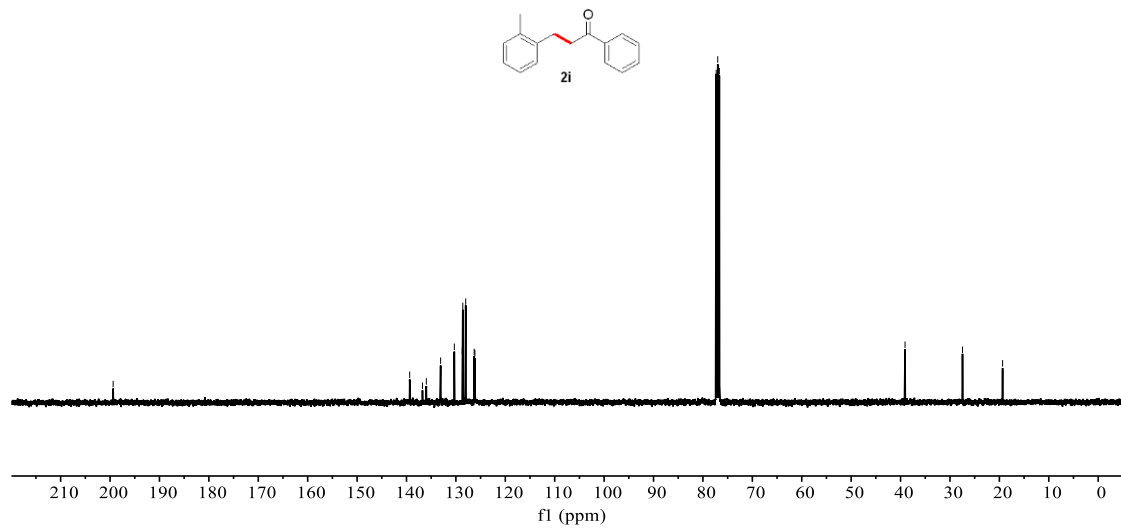

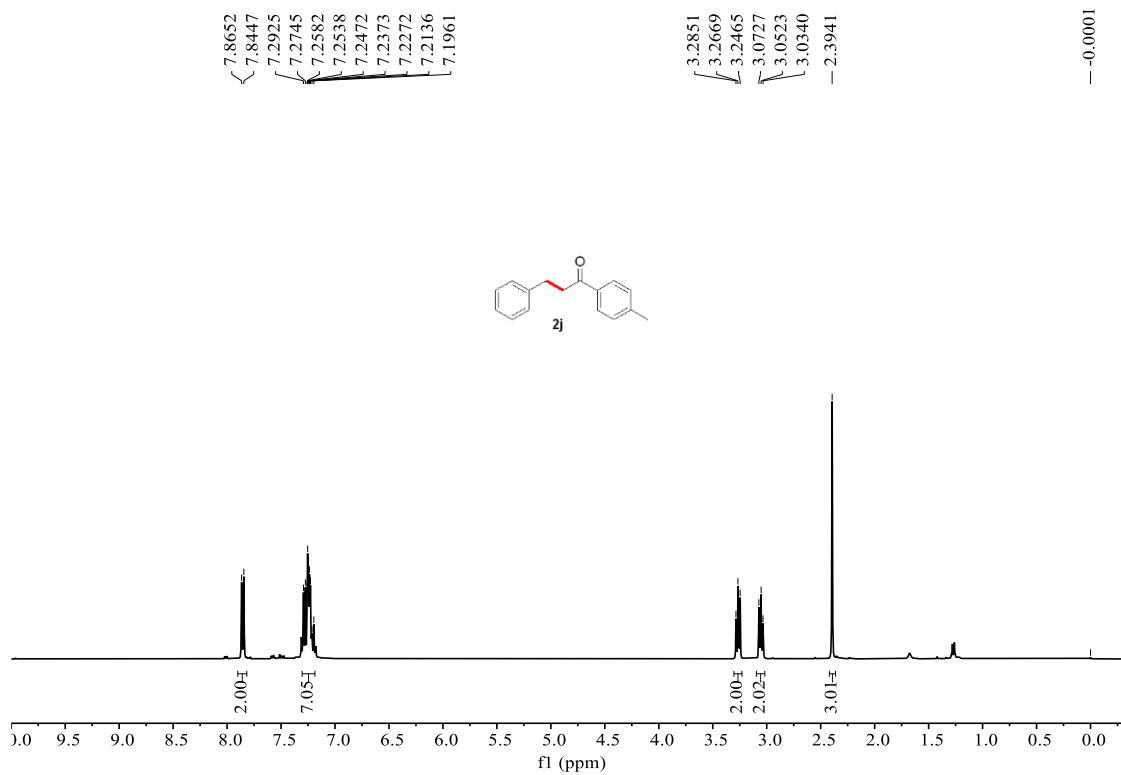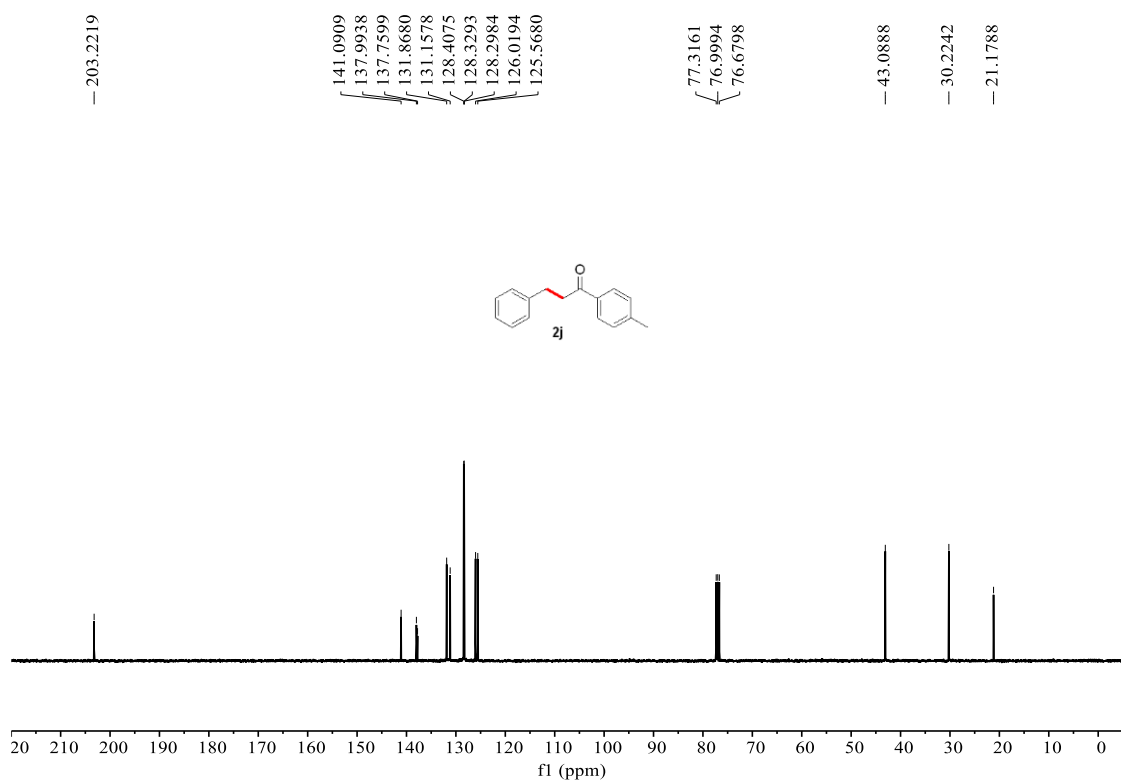

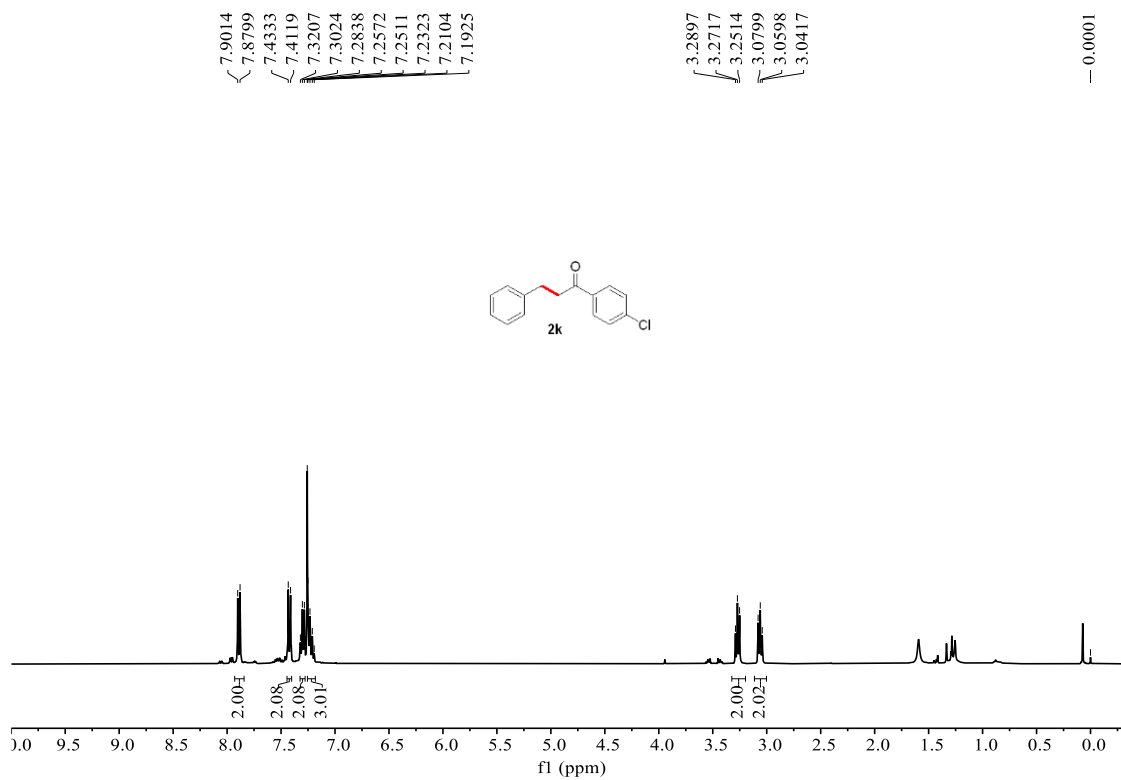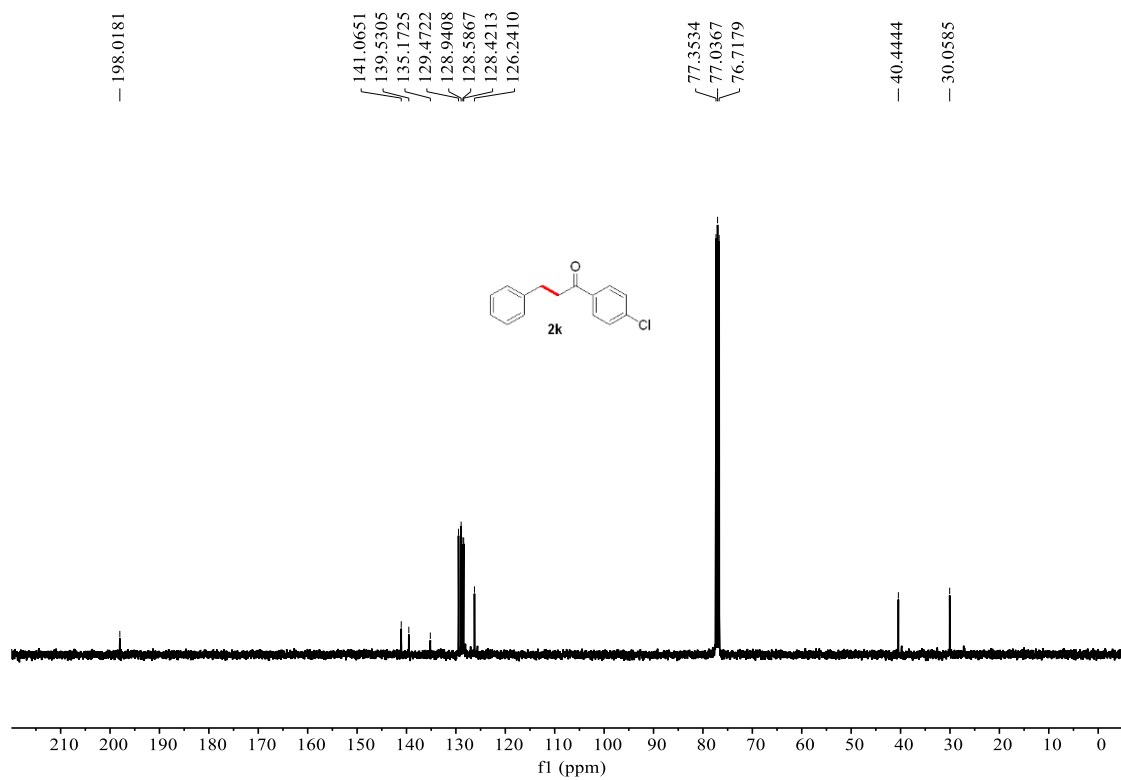

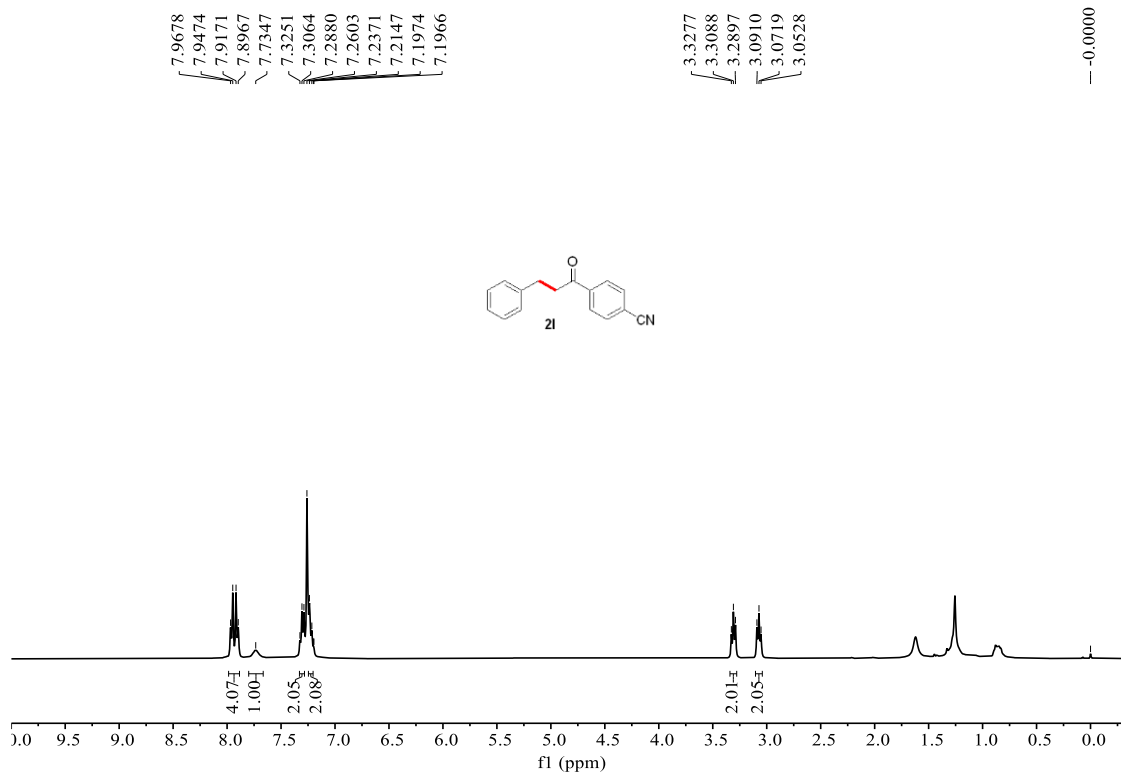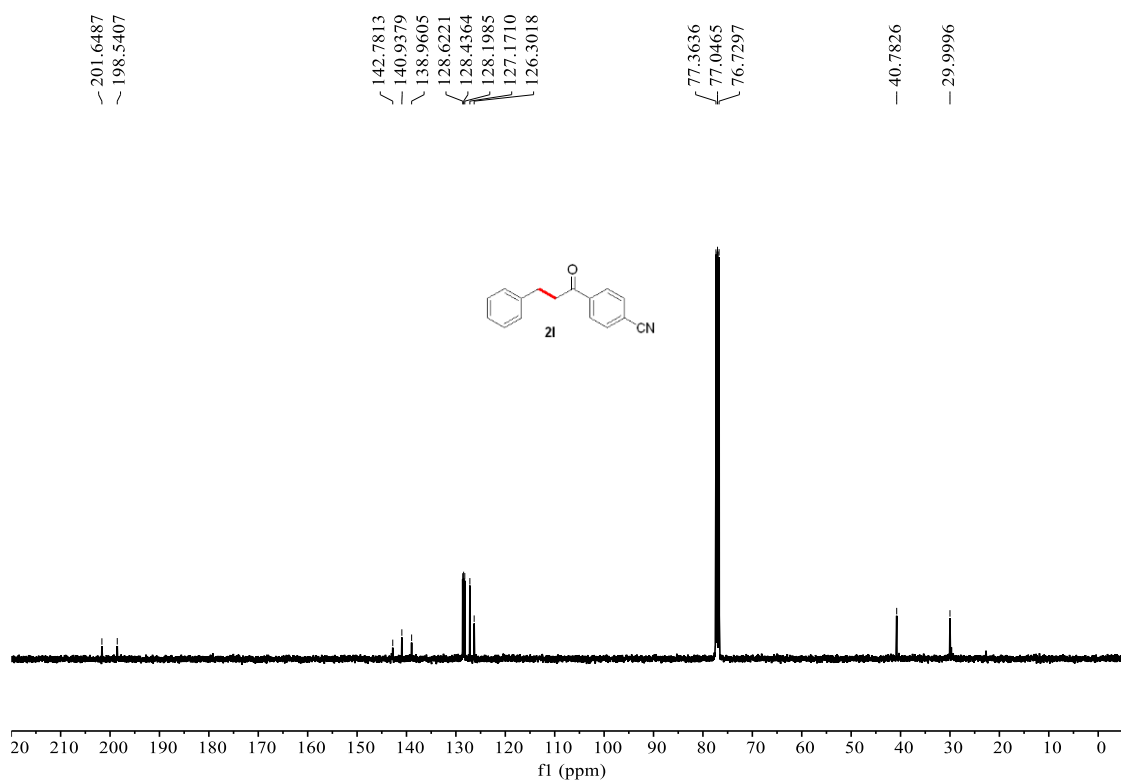

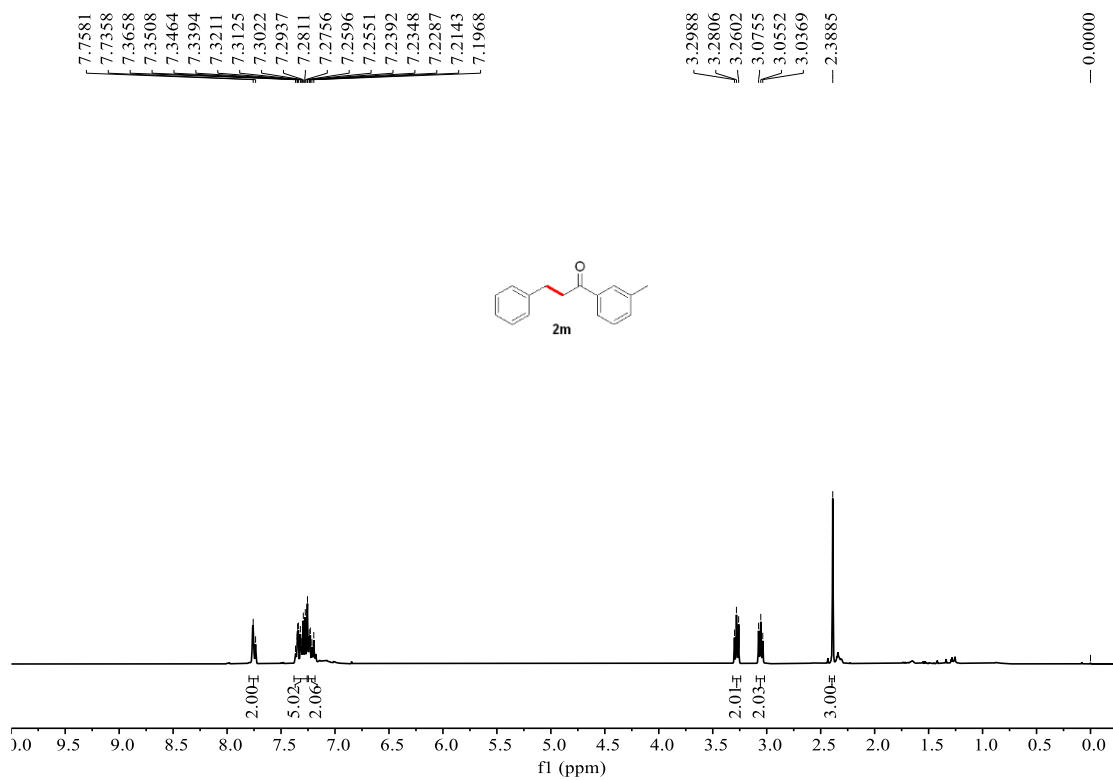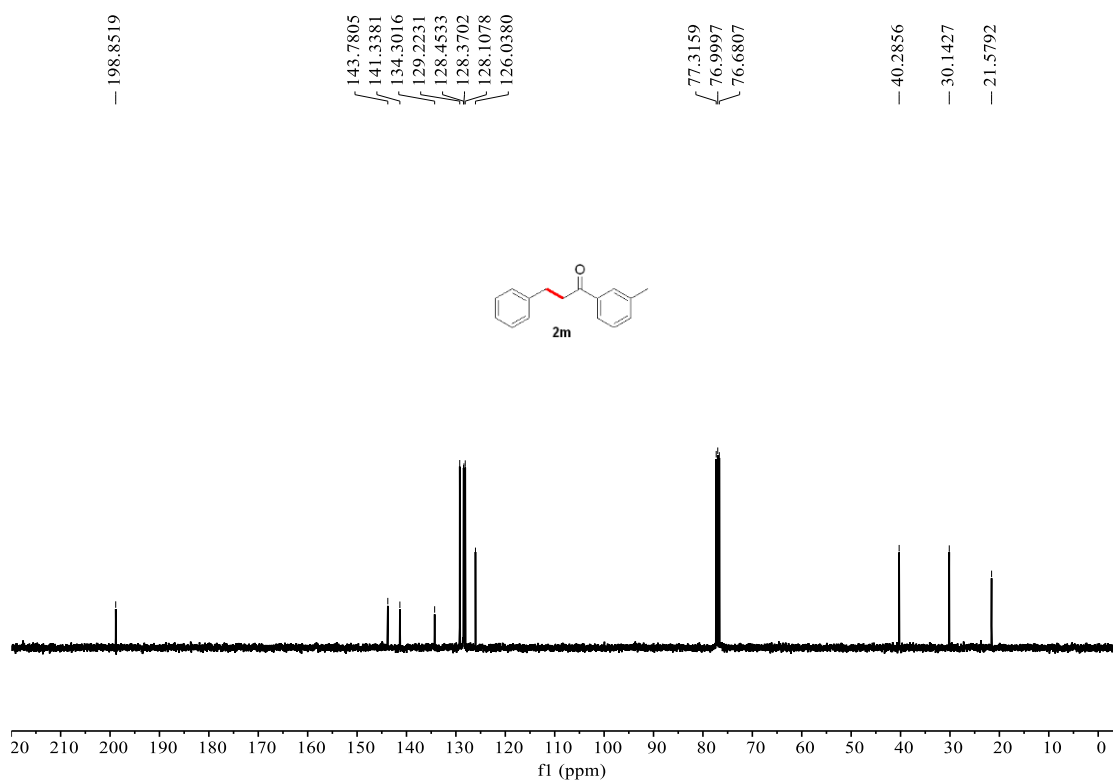

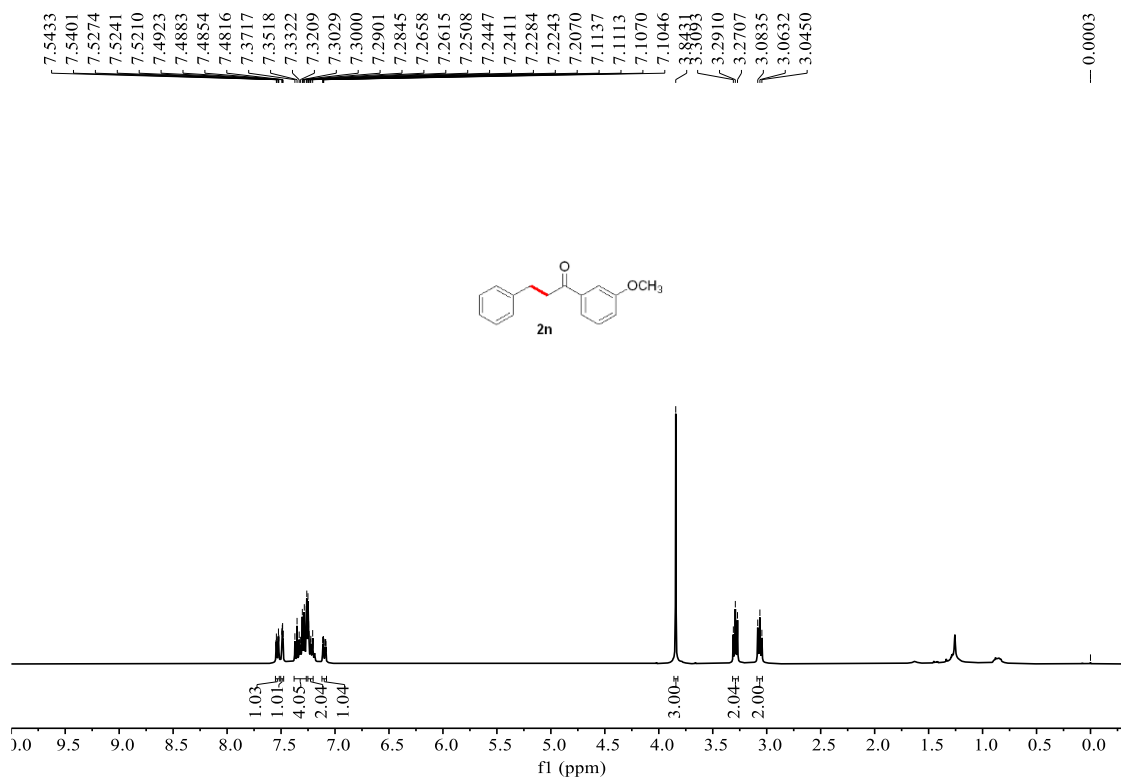

— 0.0003

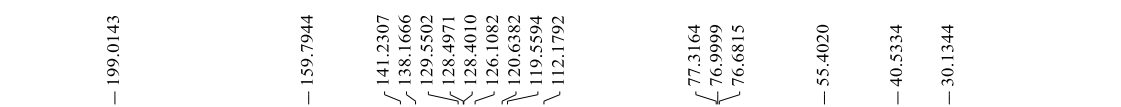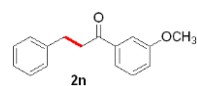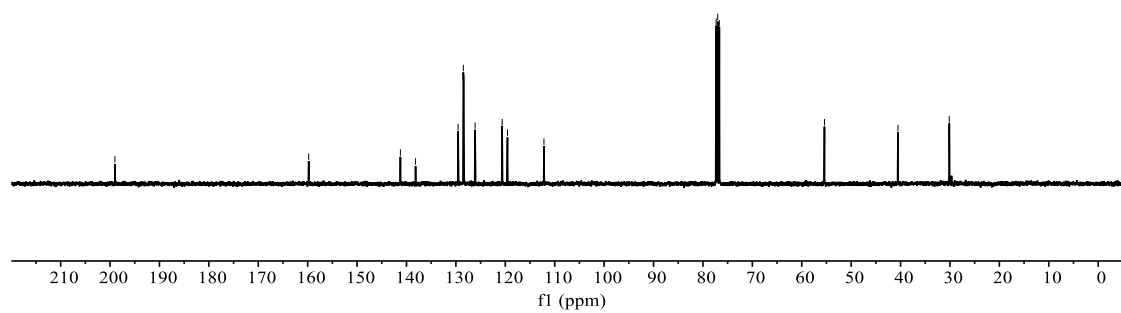



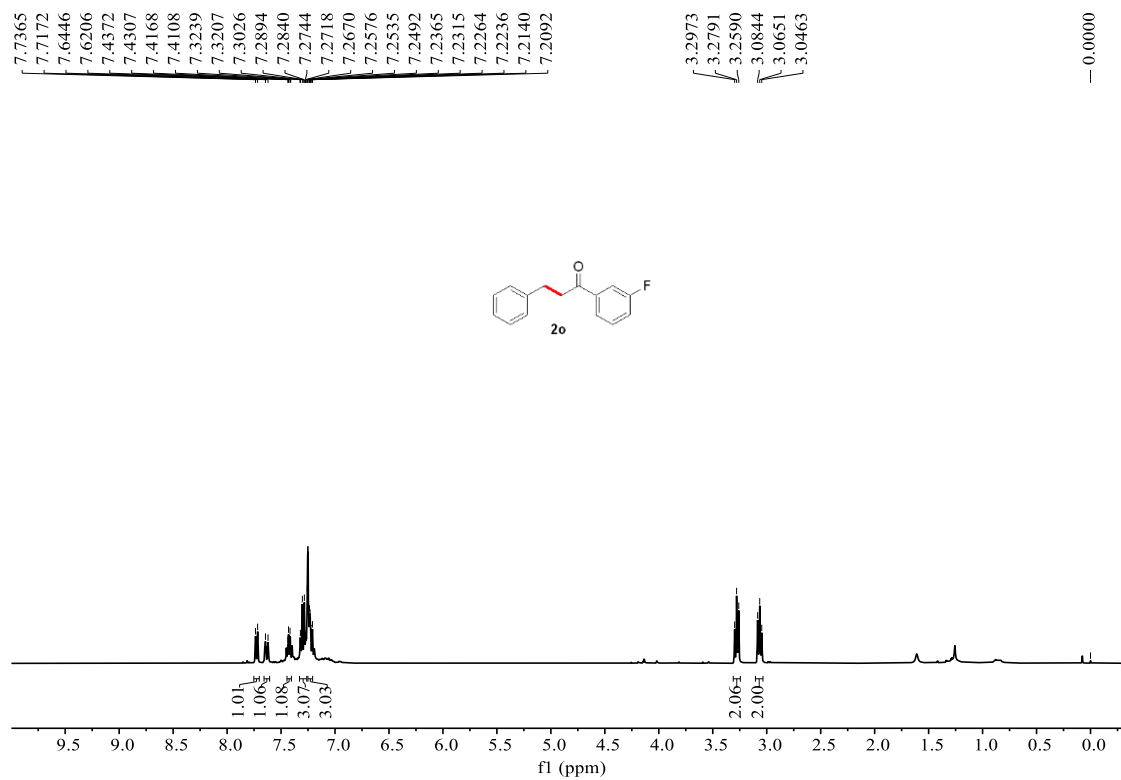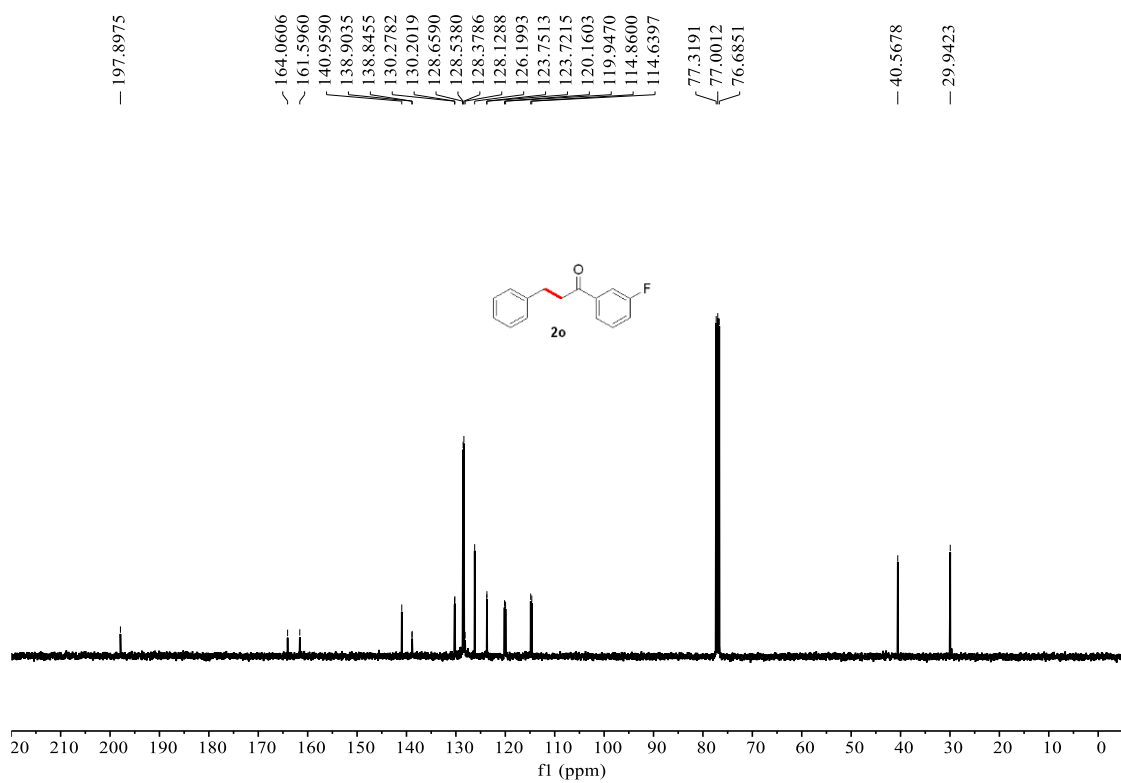

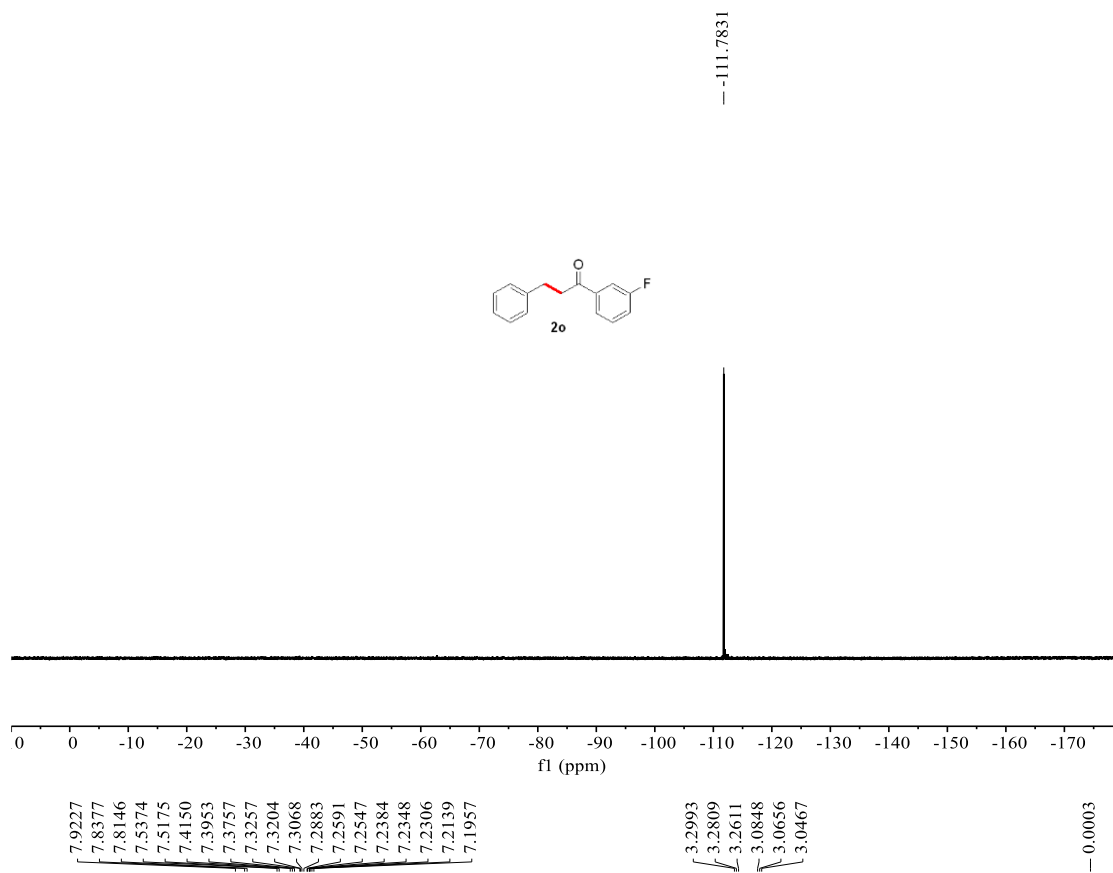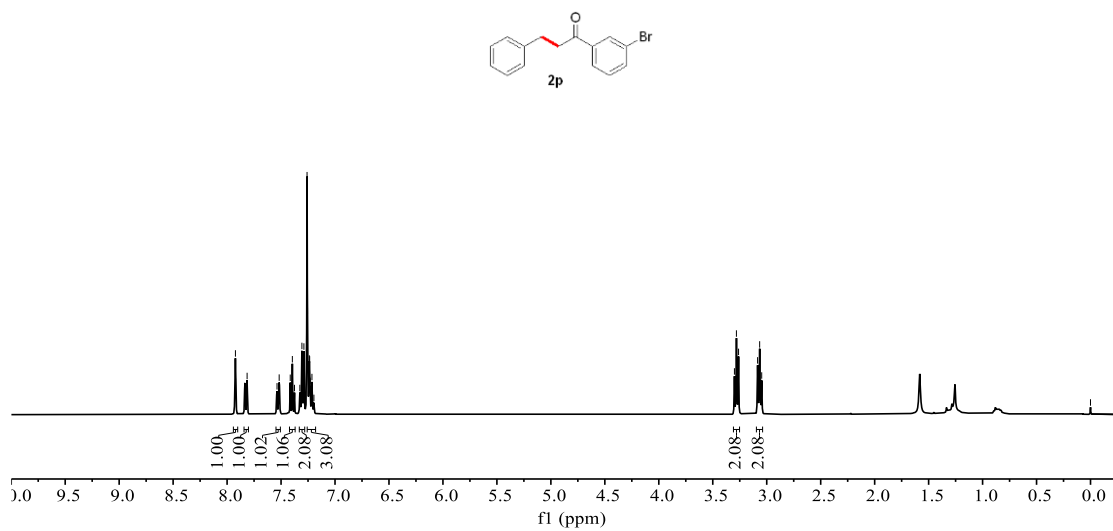

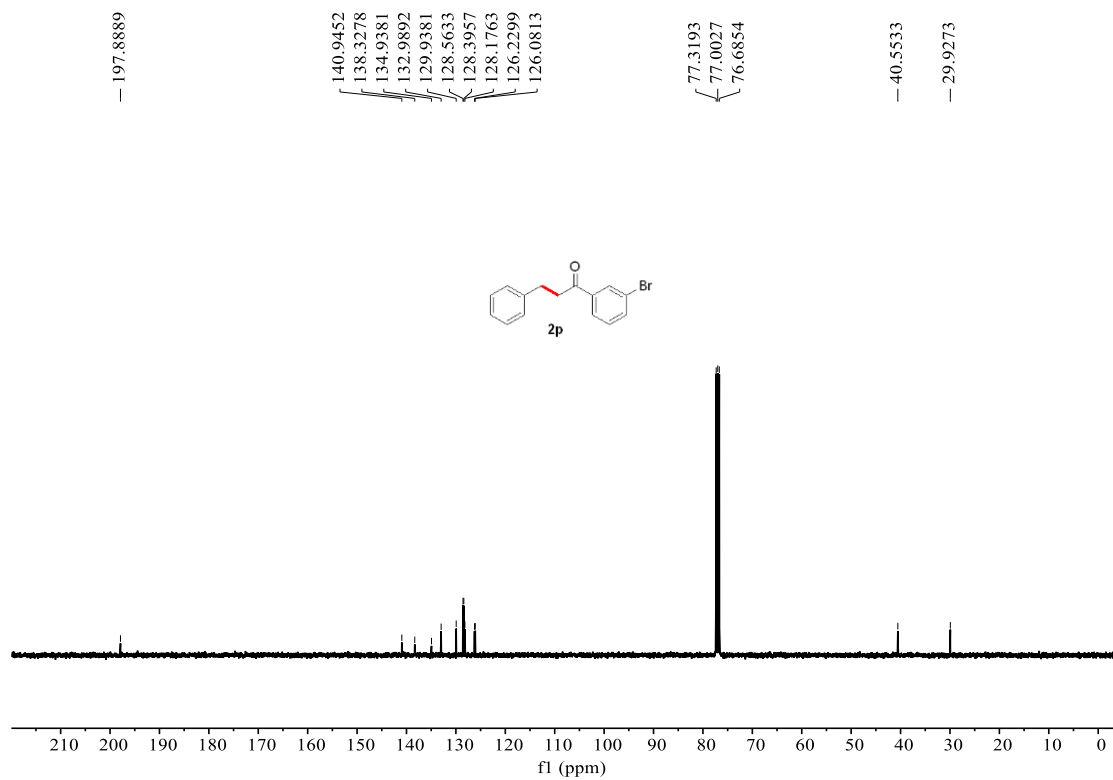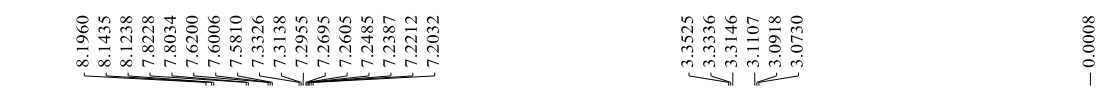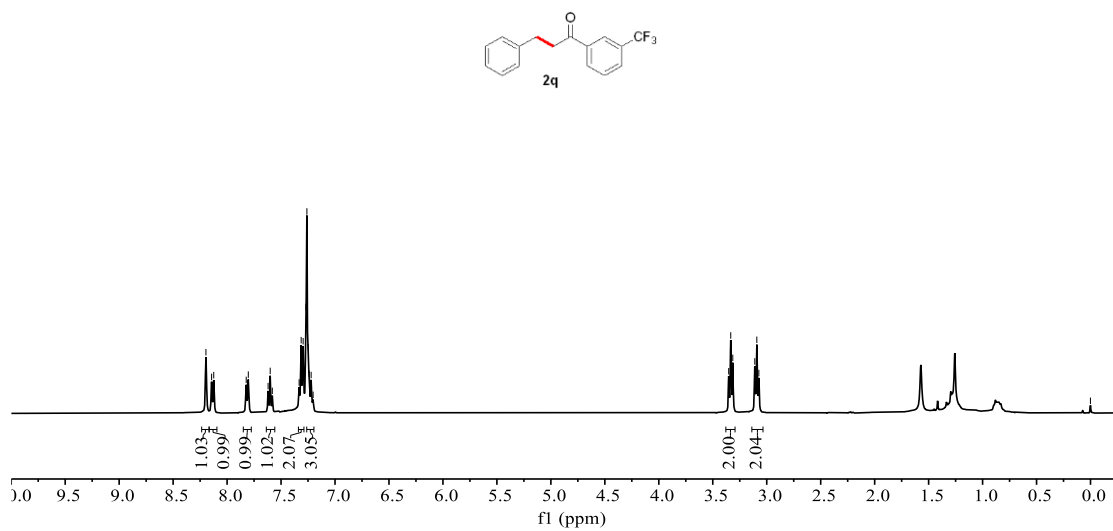

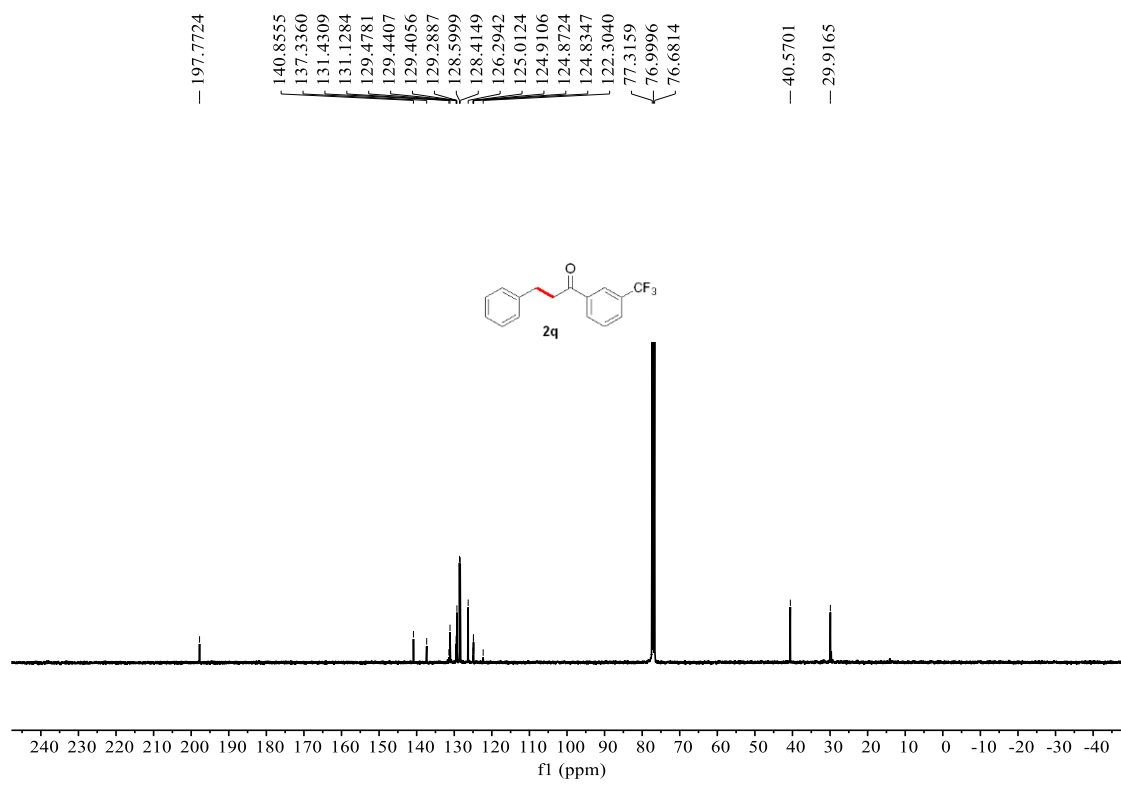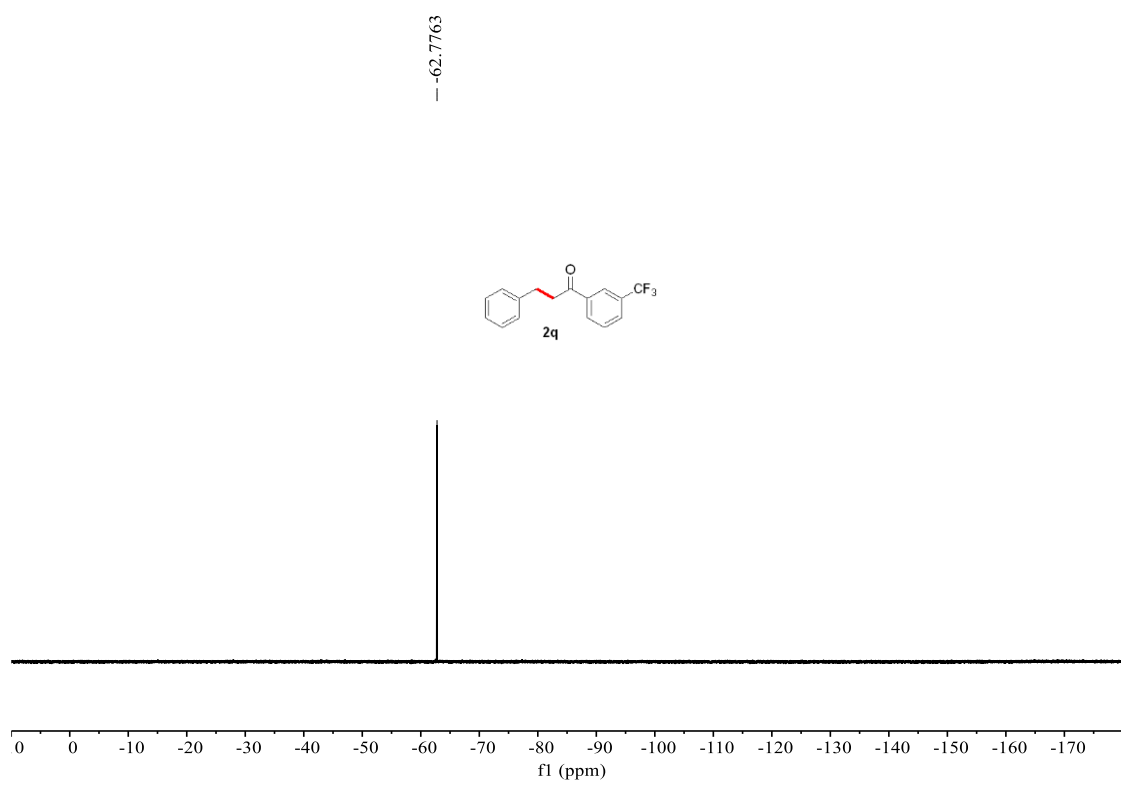

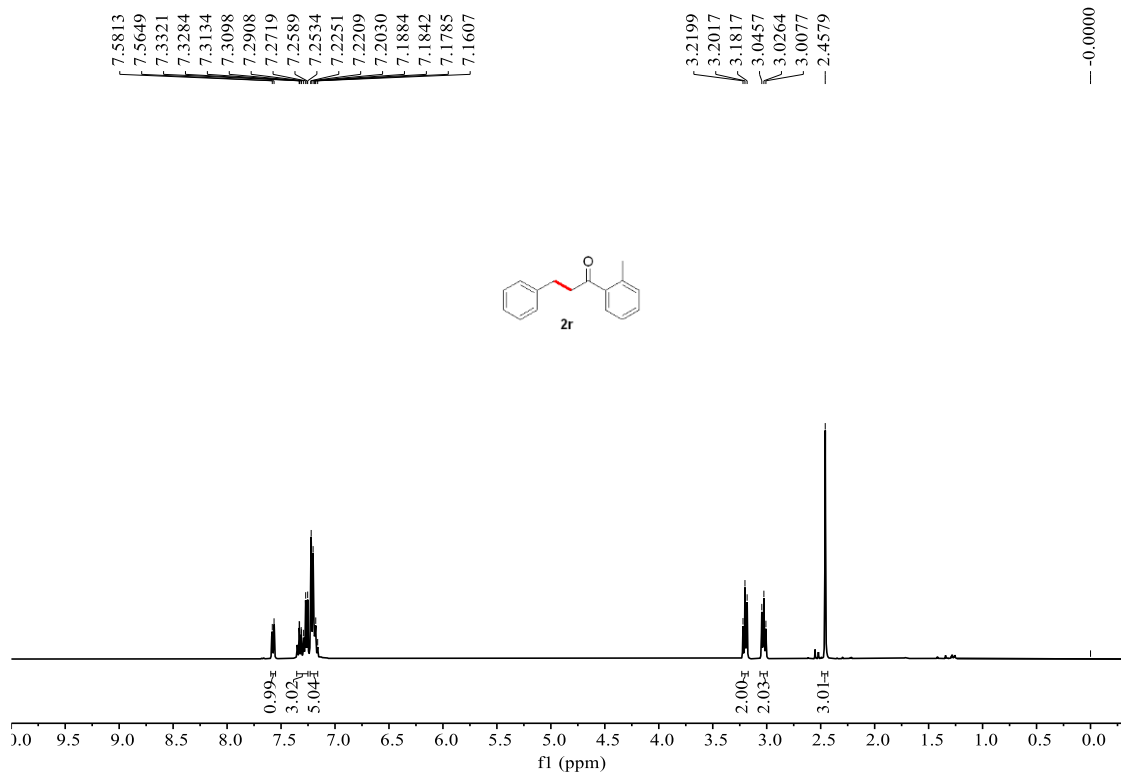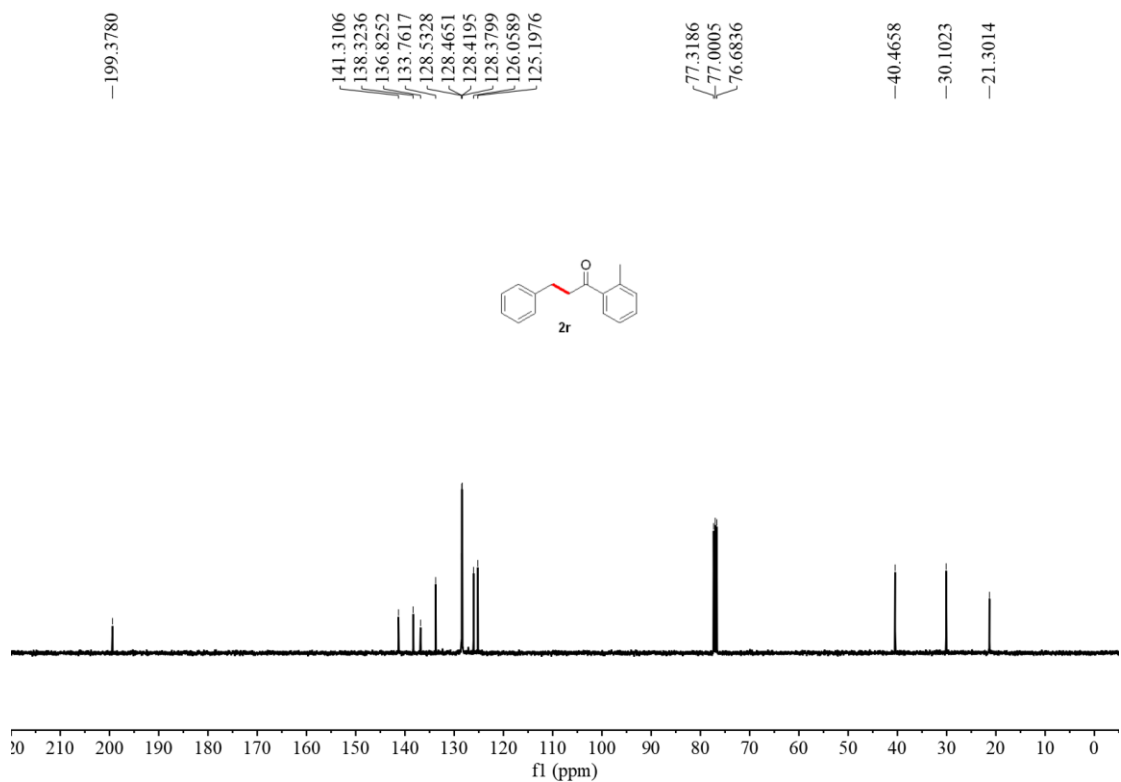

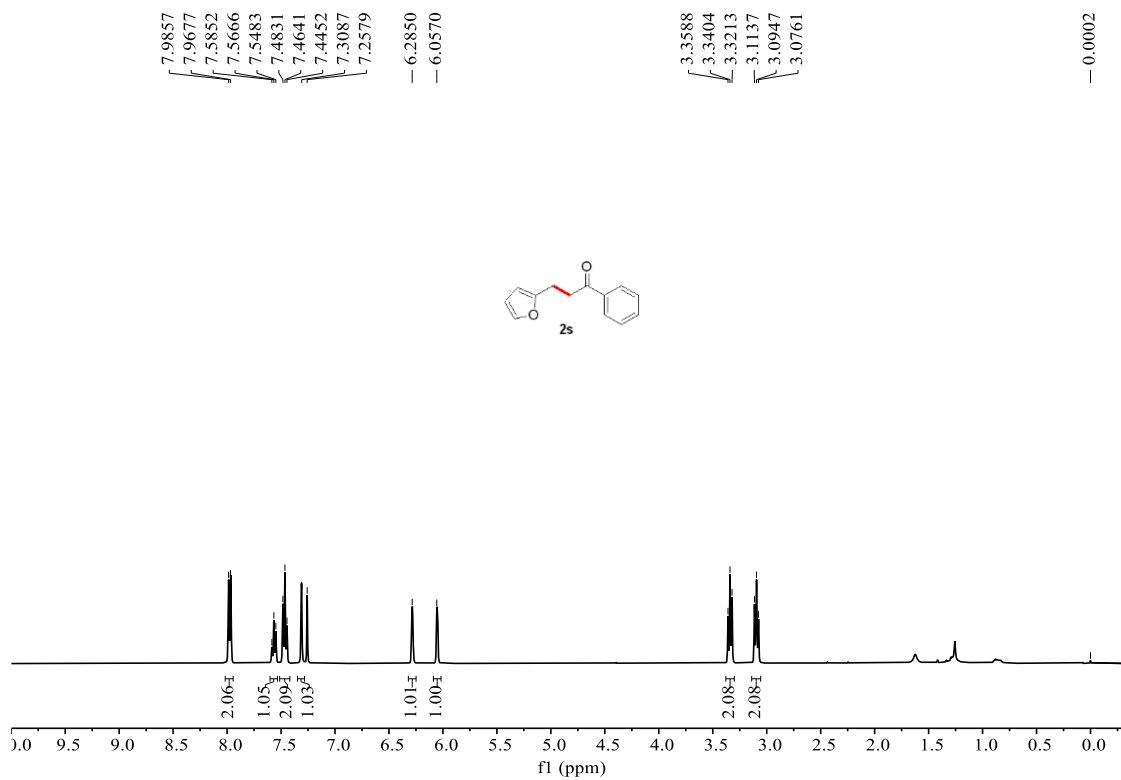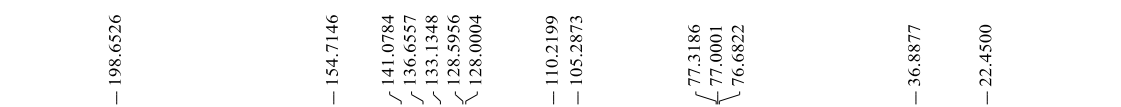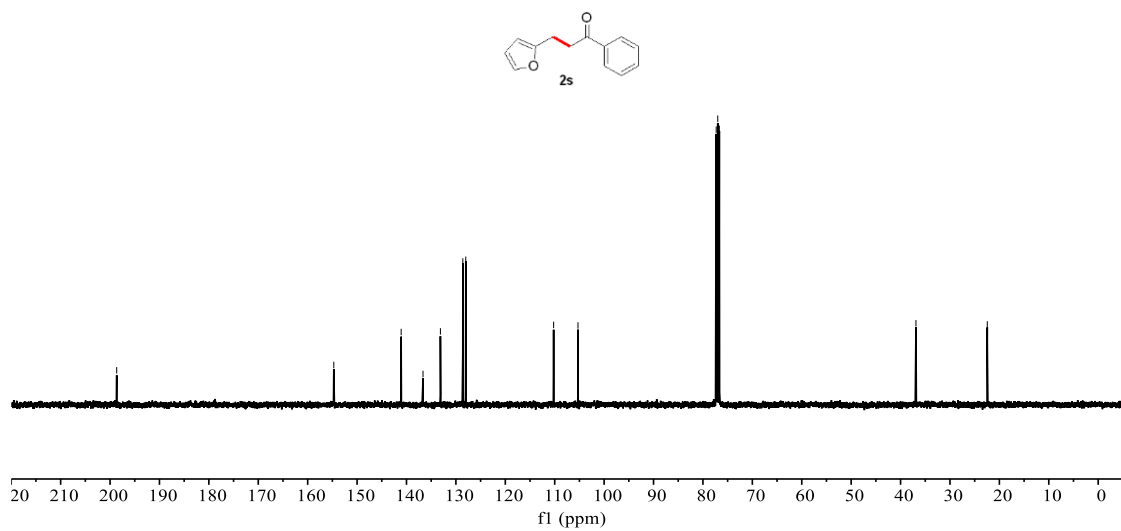

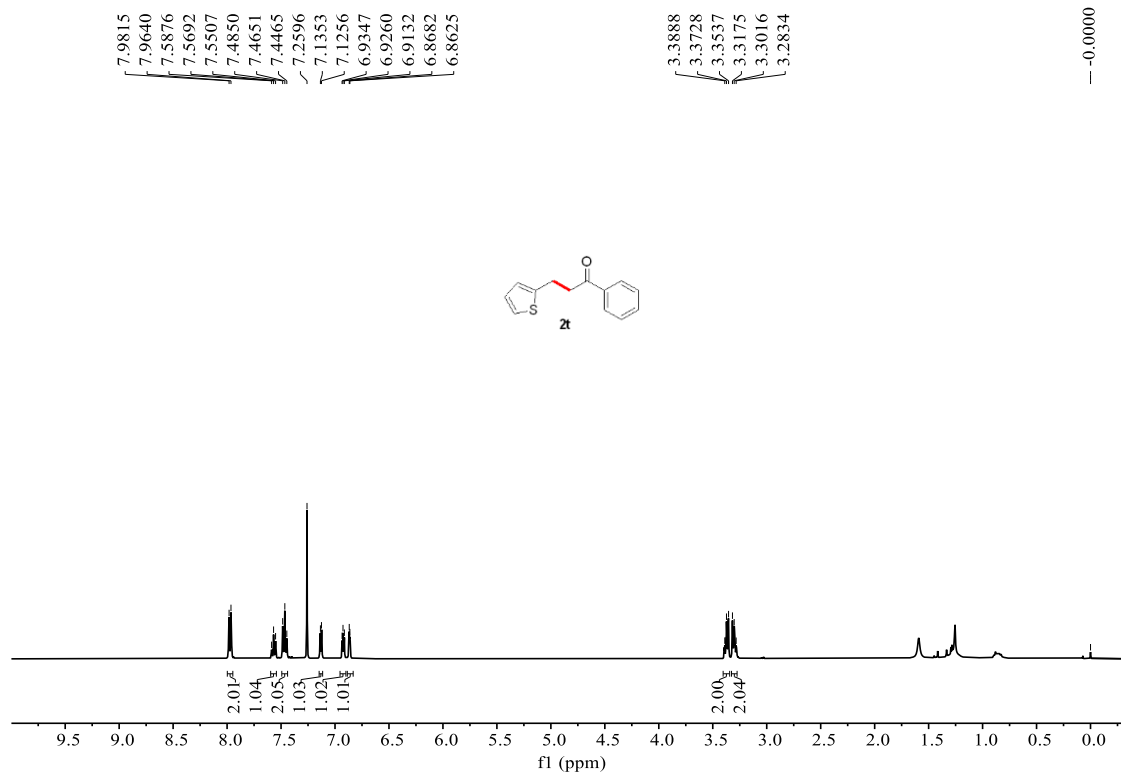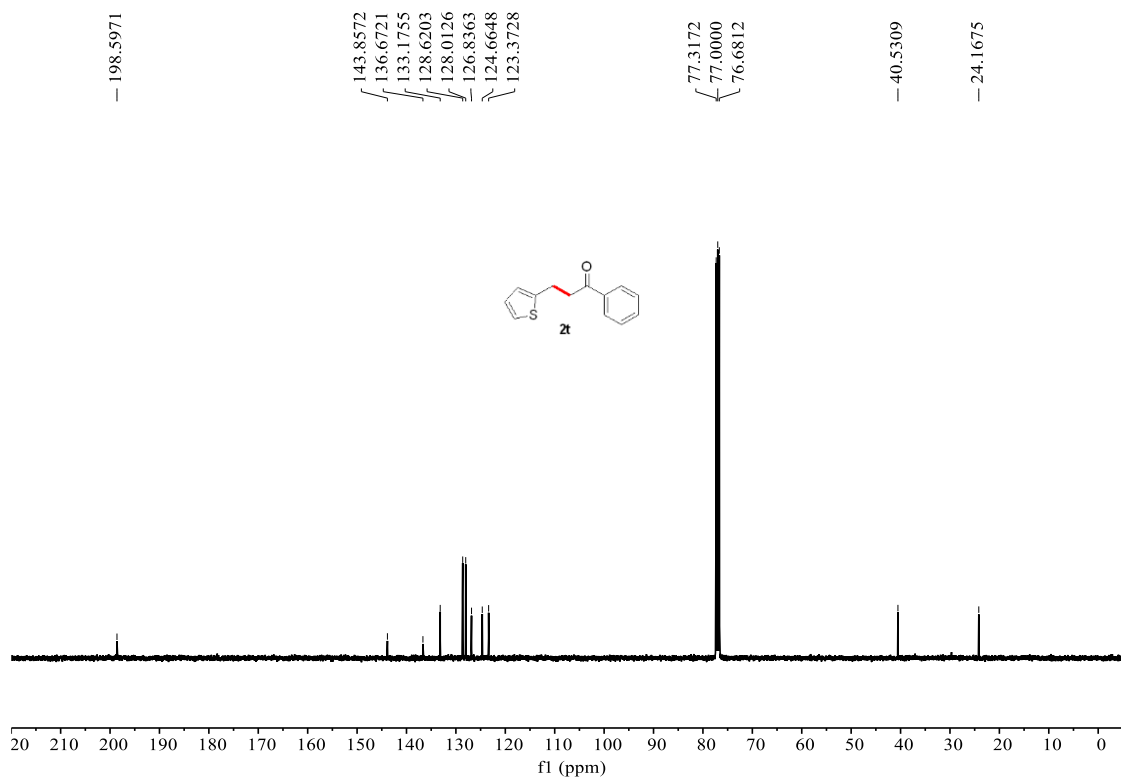

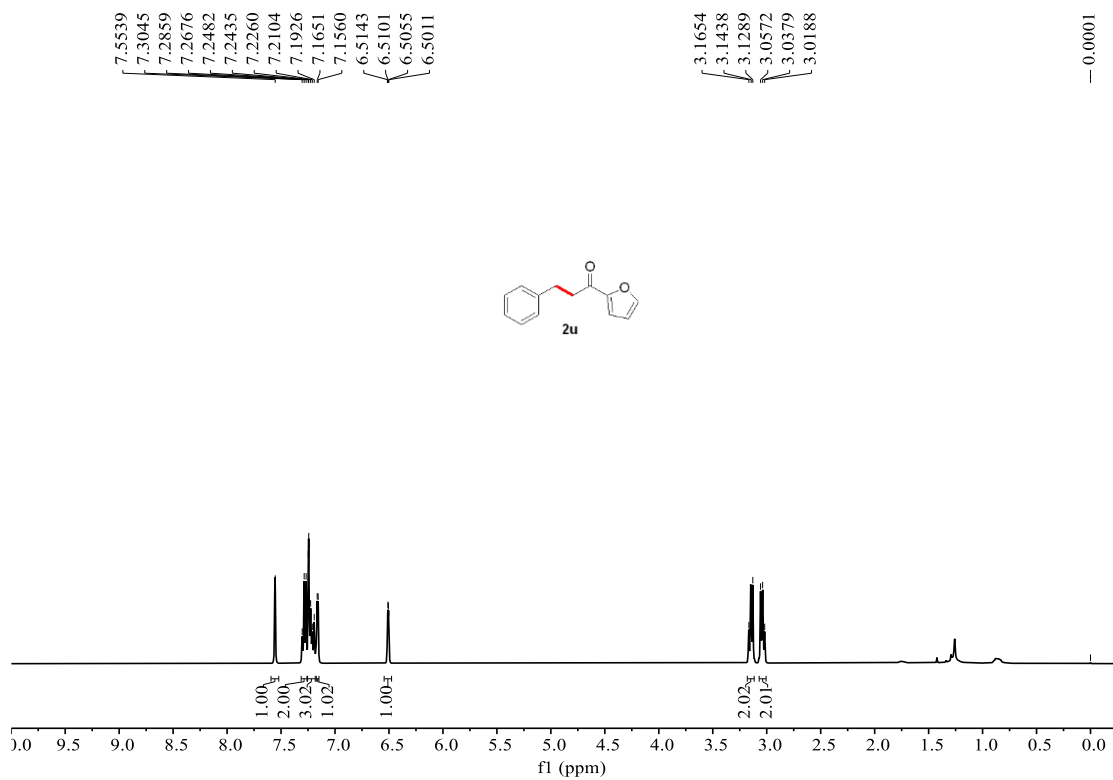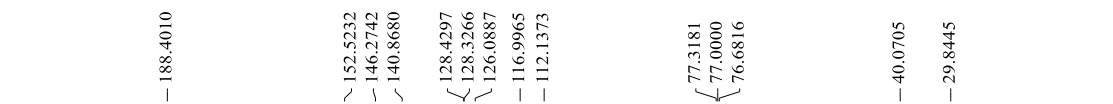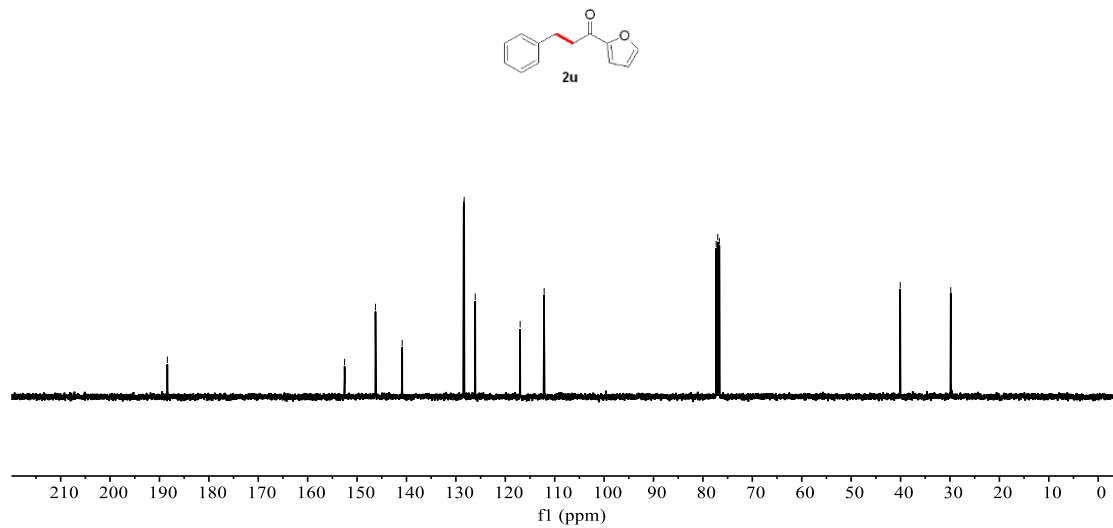



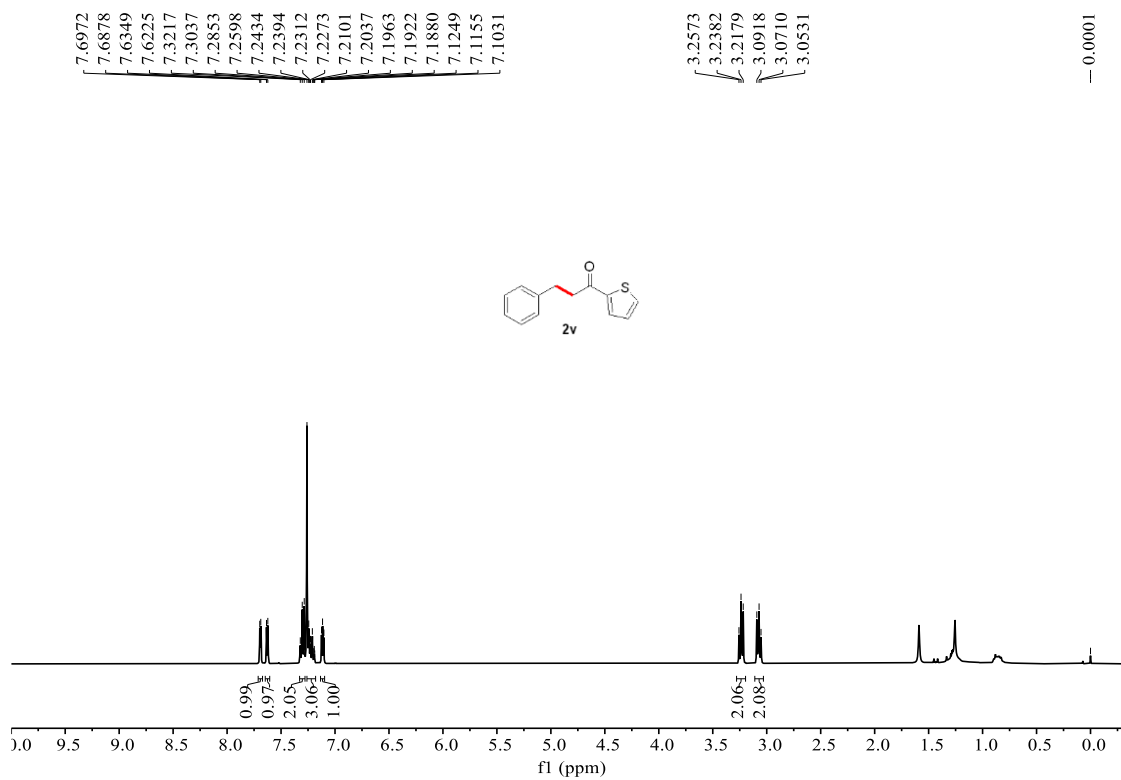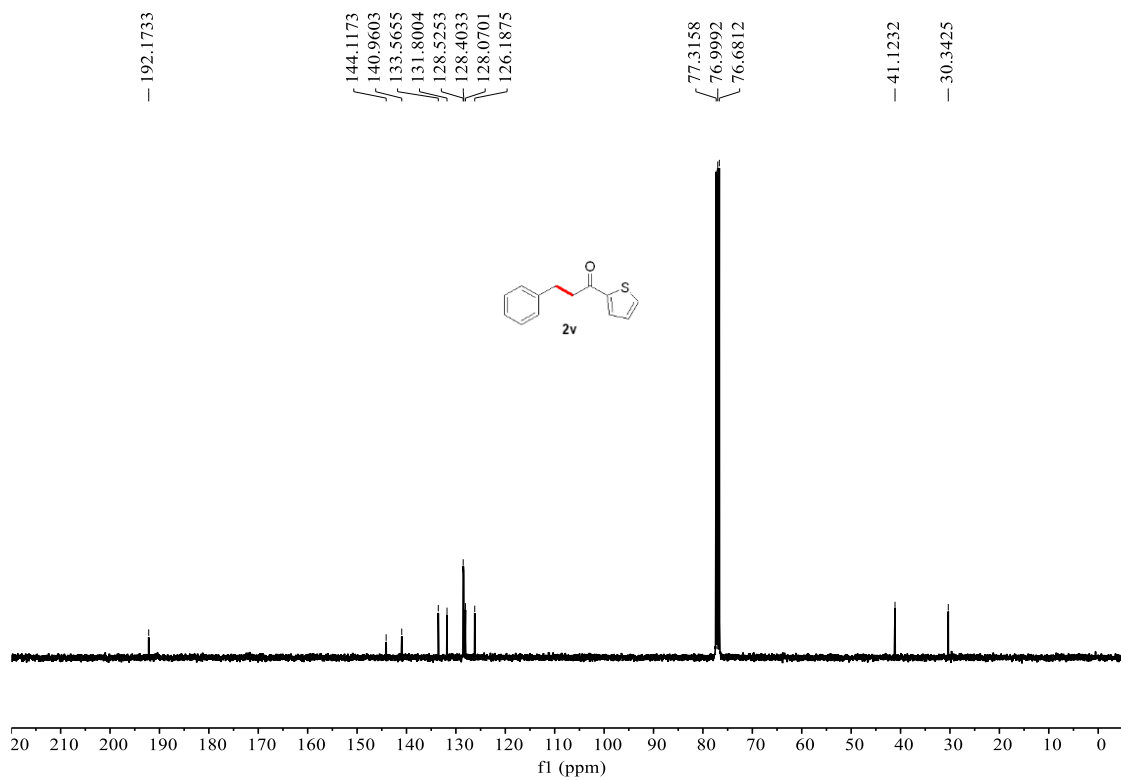

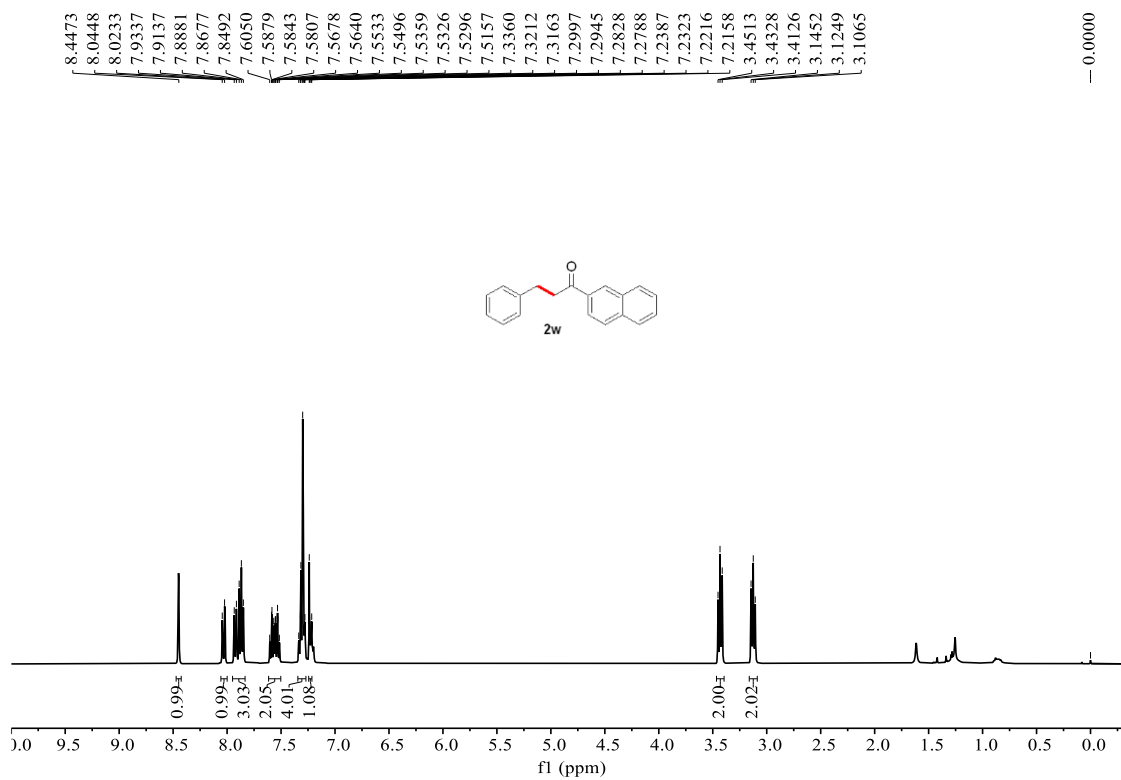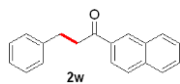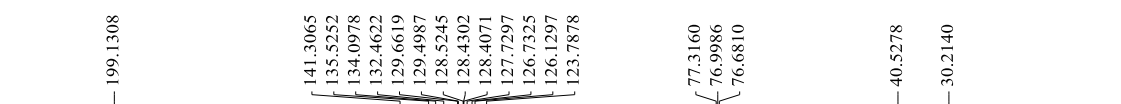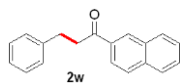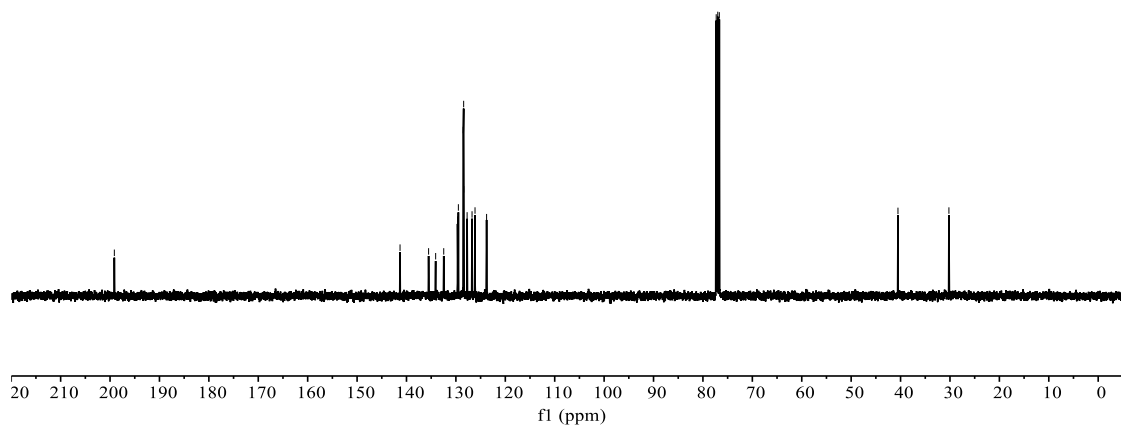

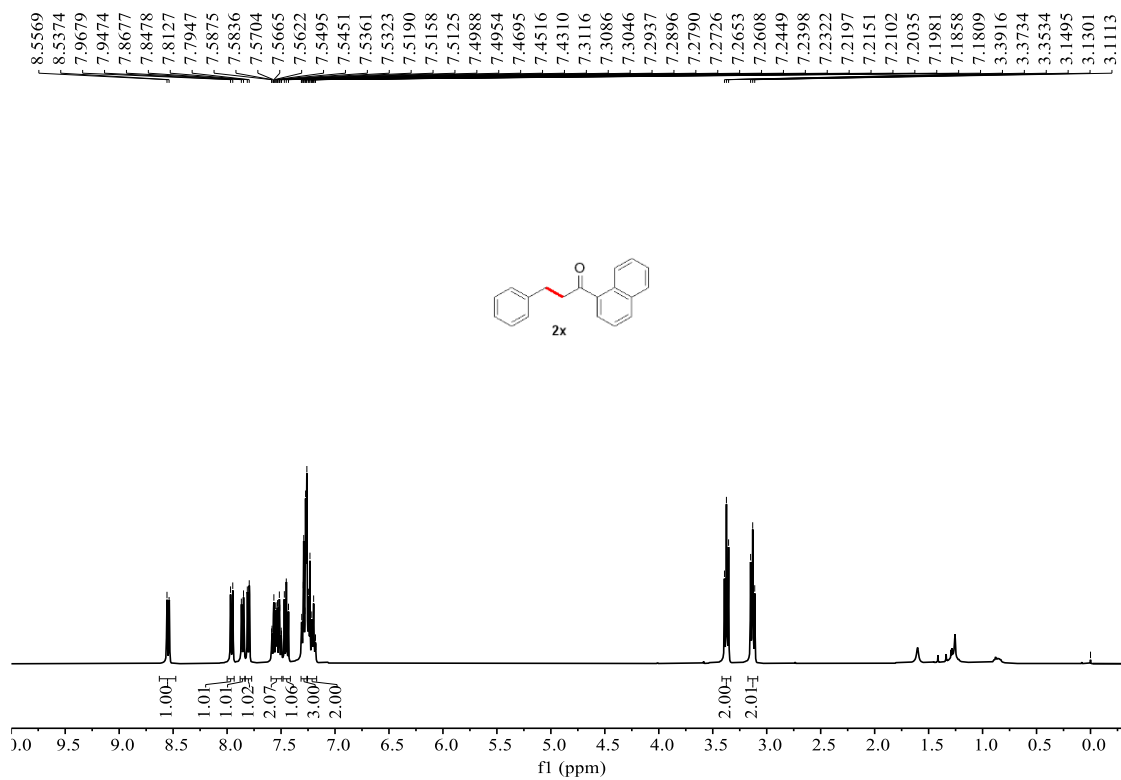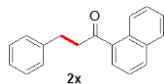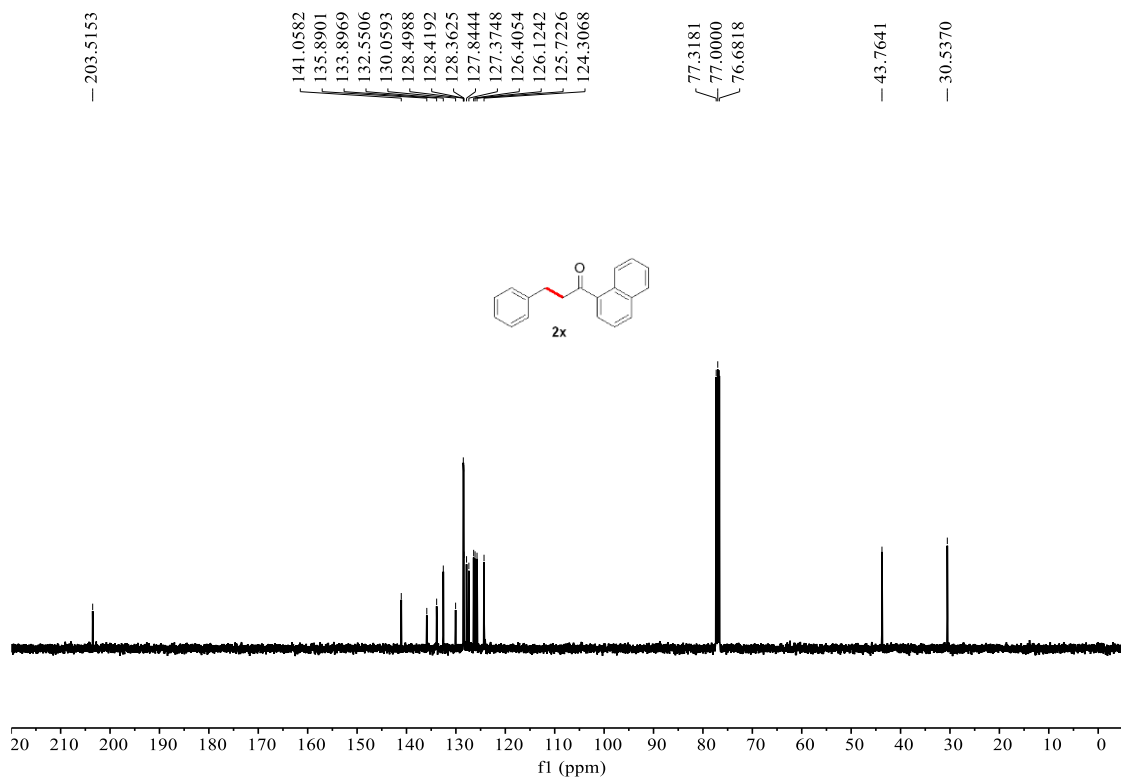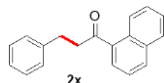

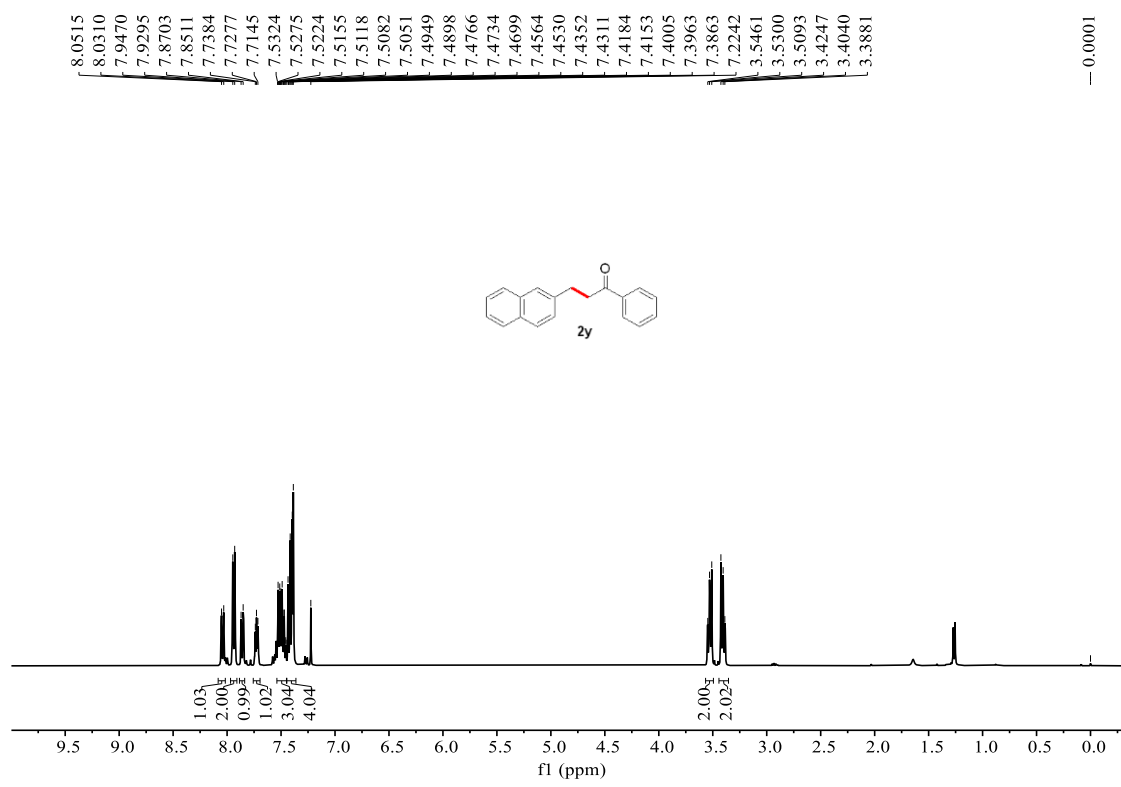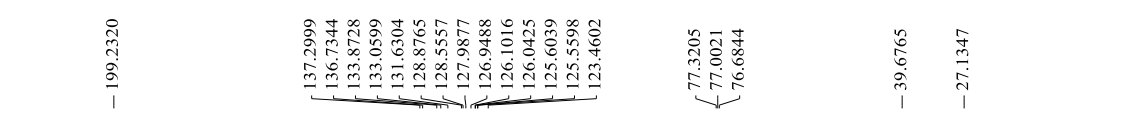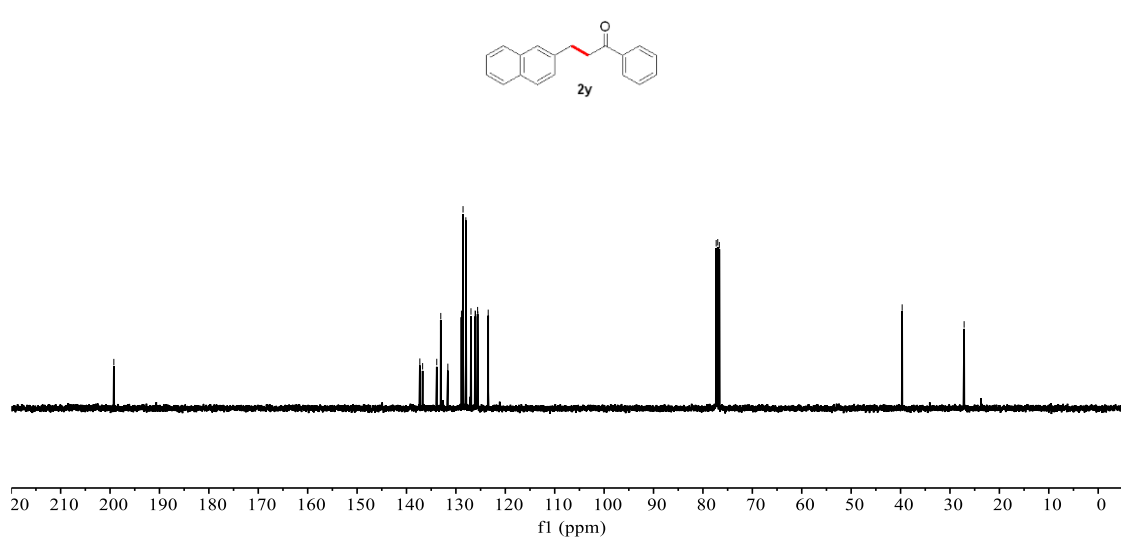

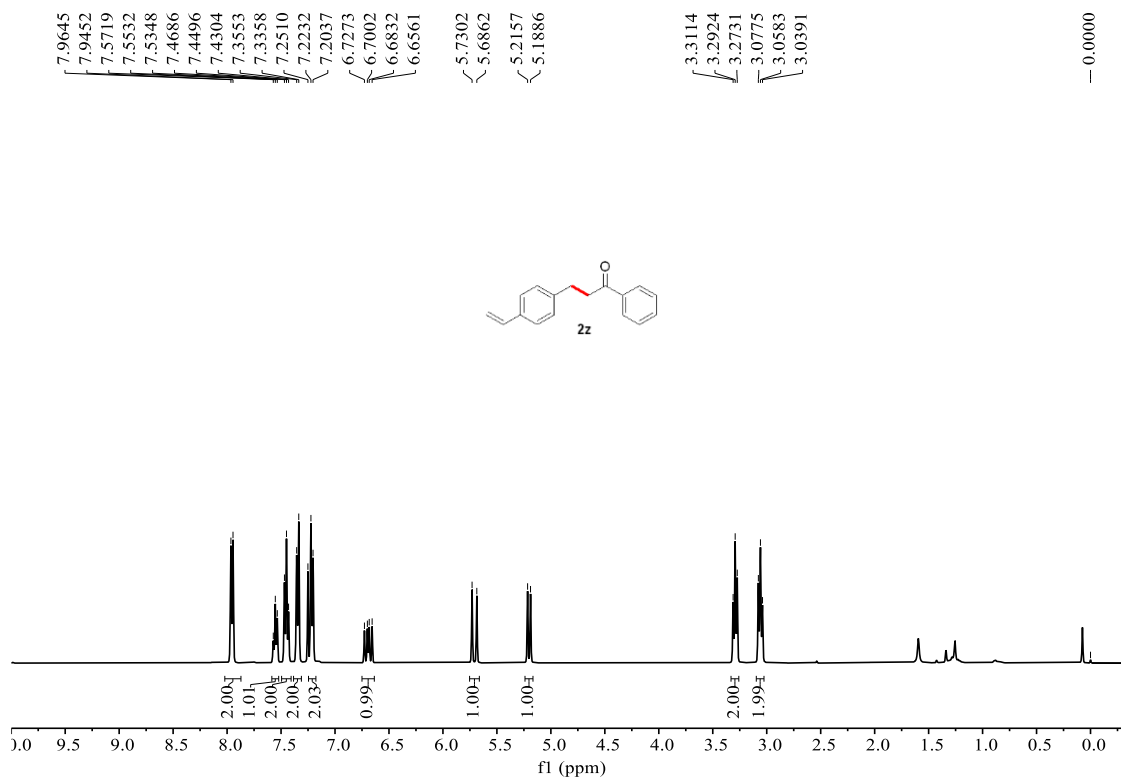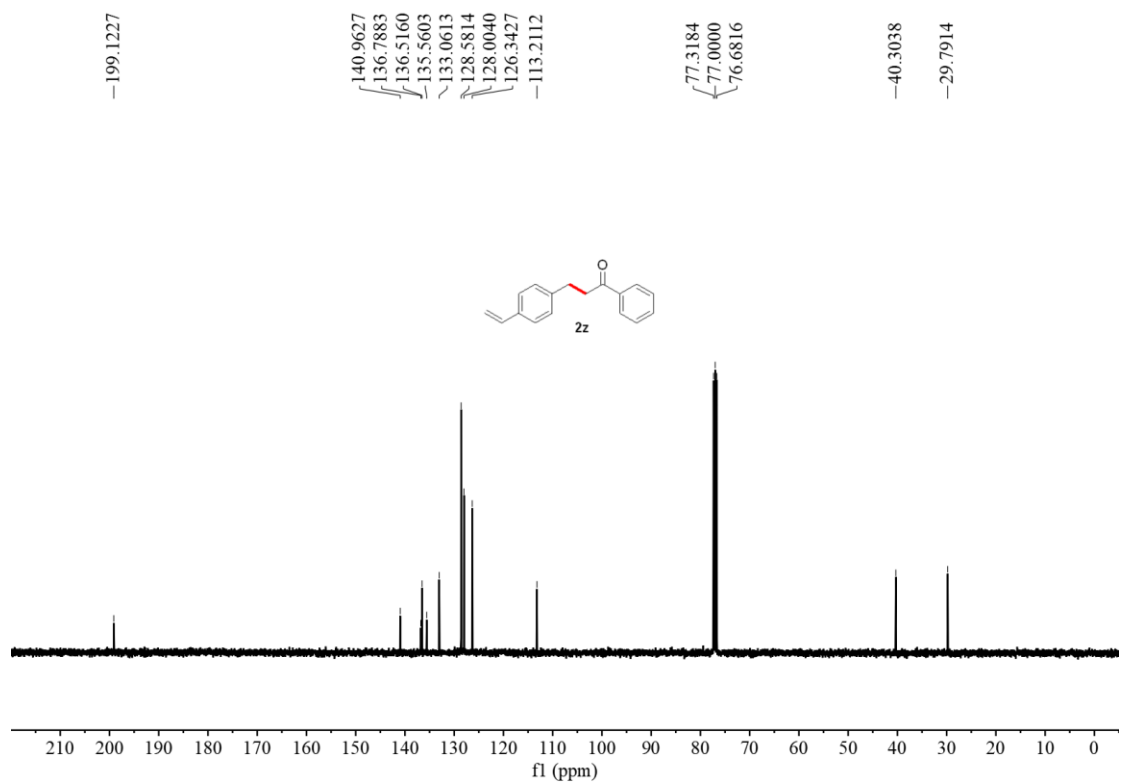

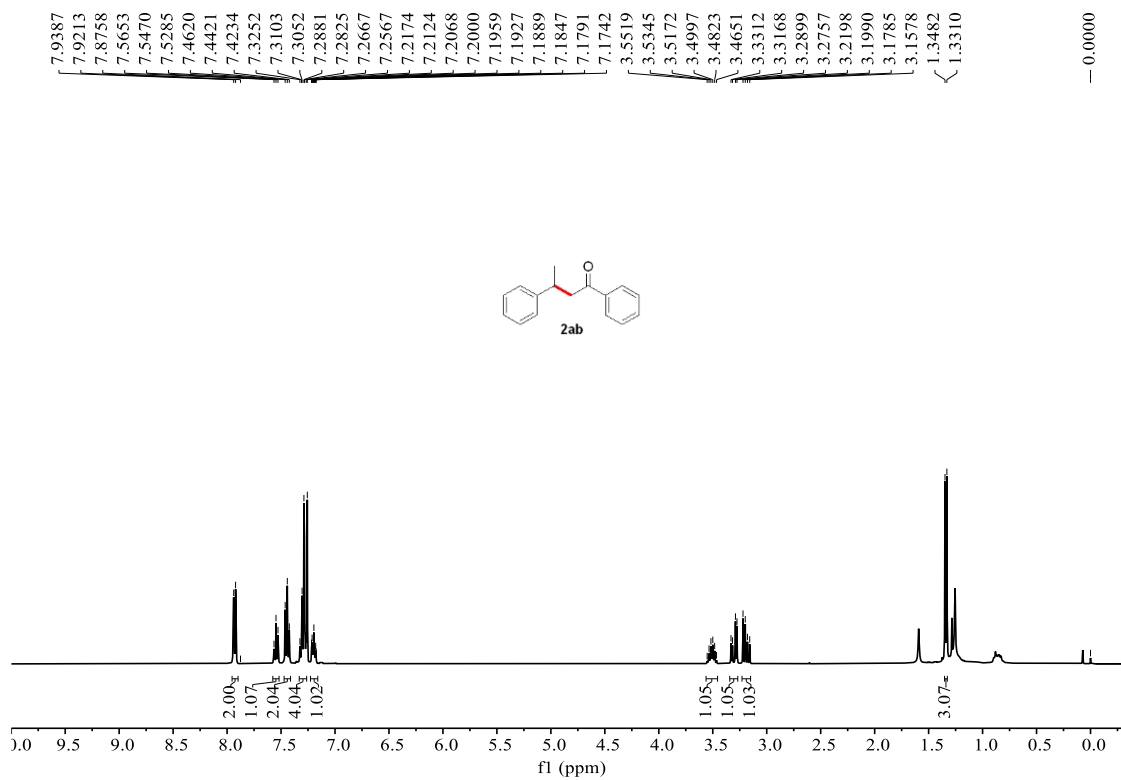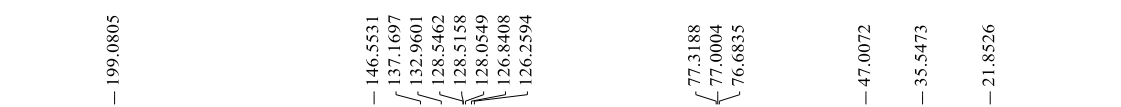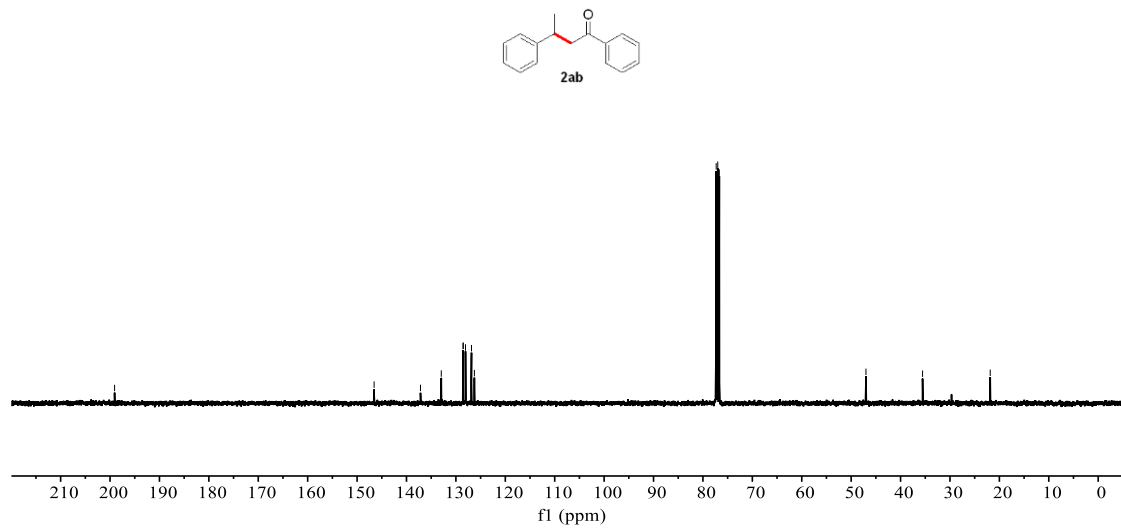

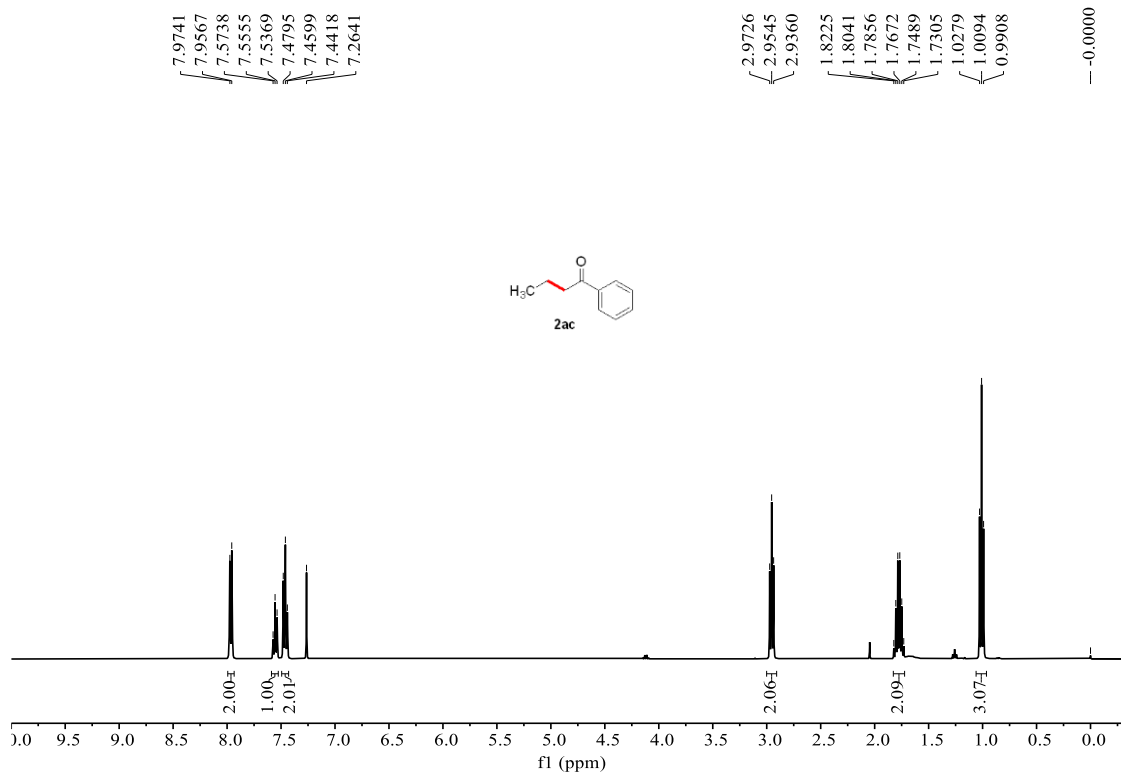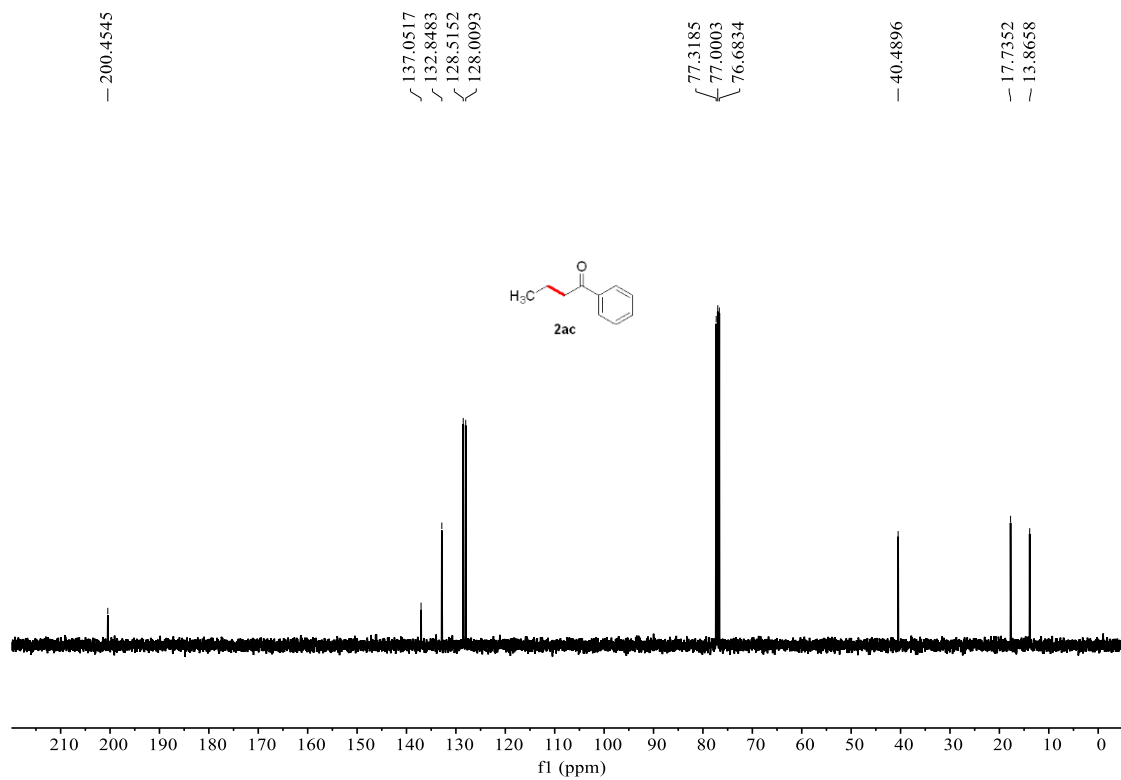

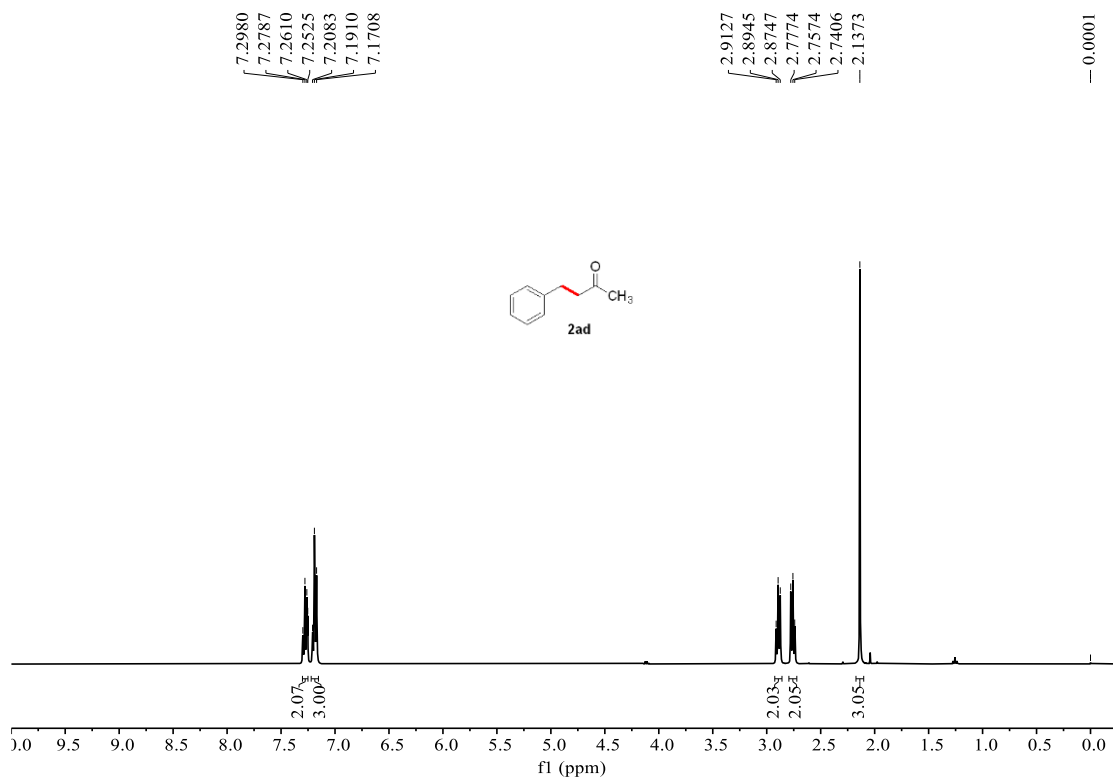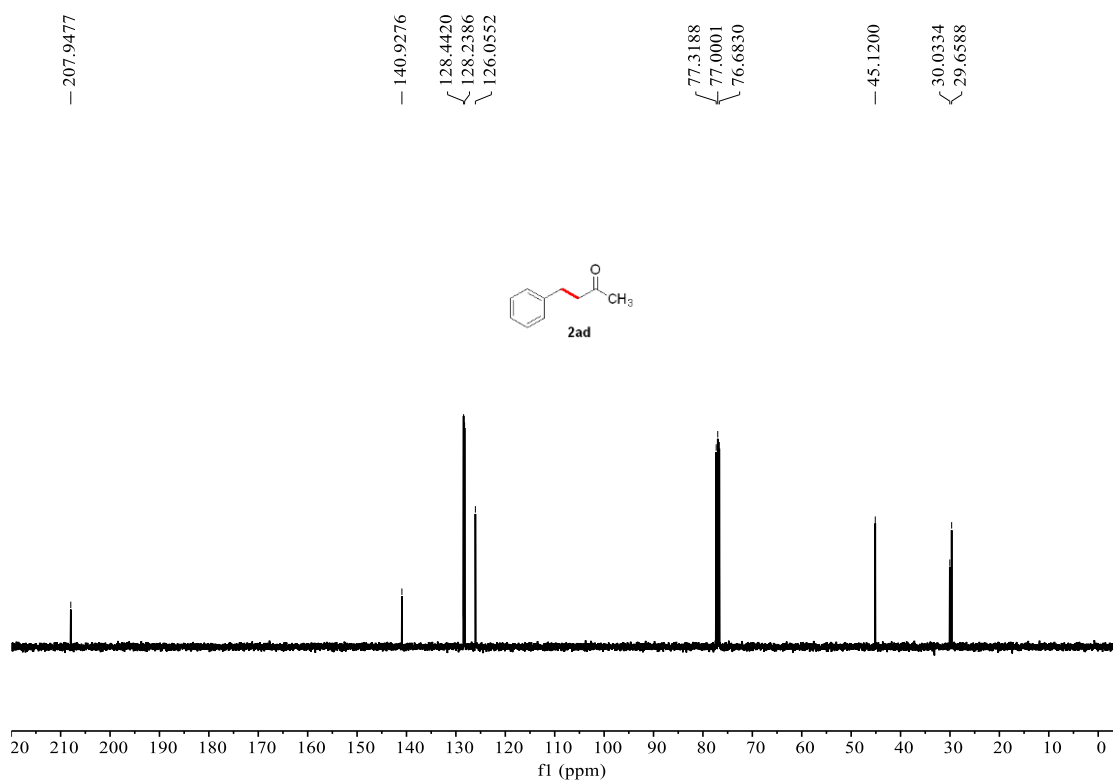



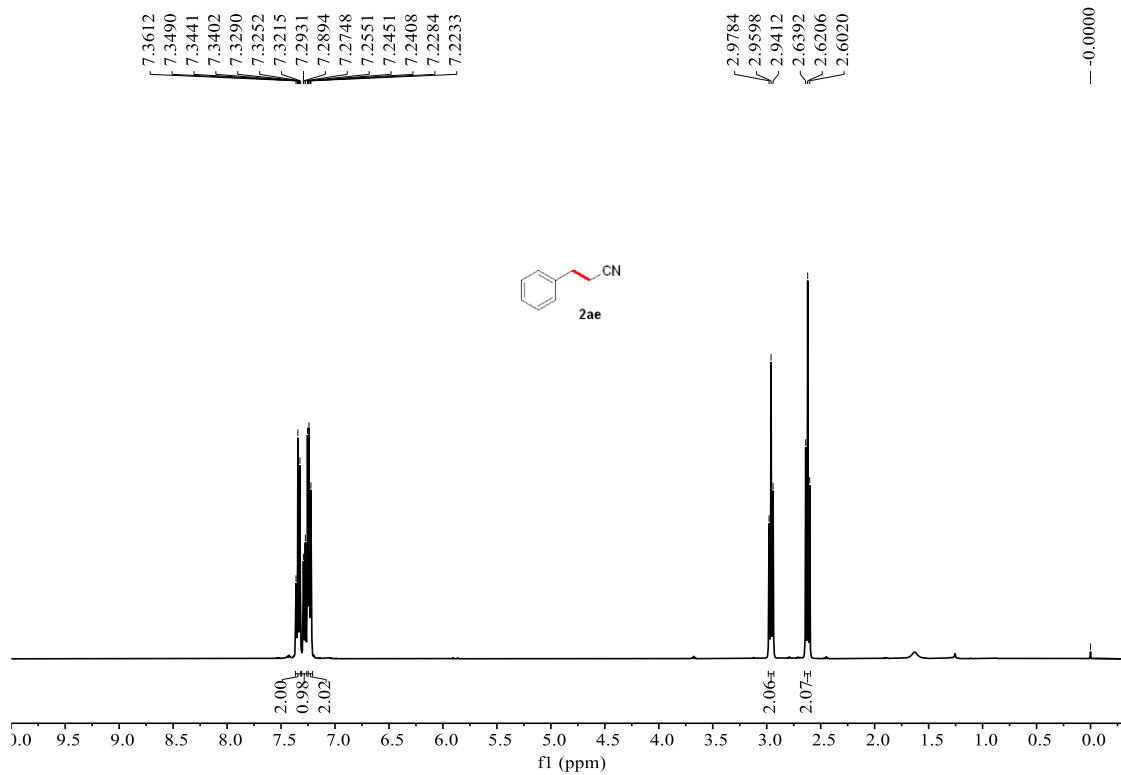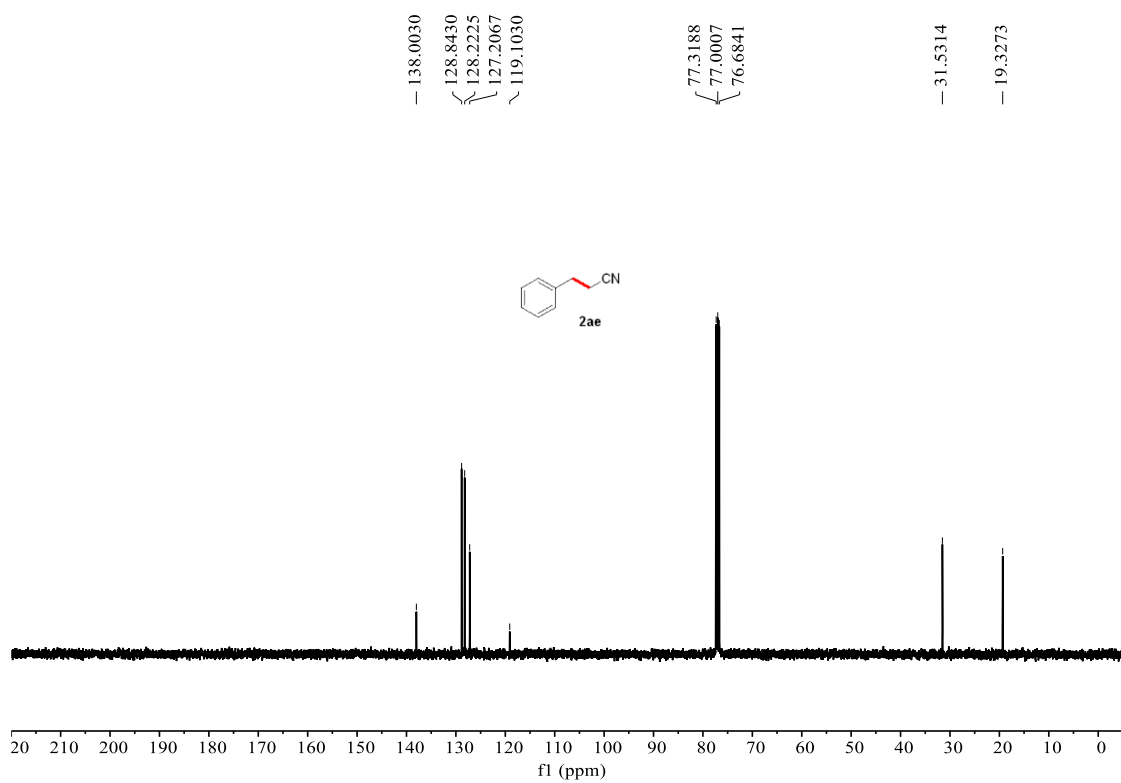

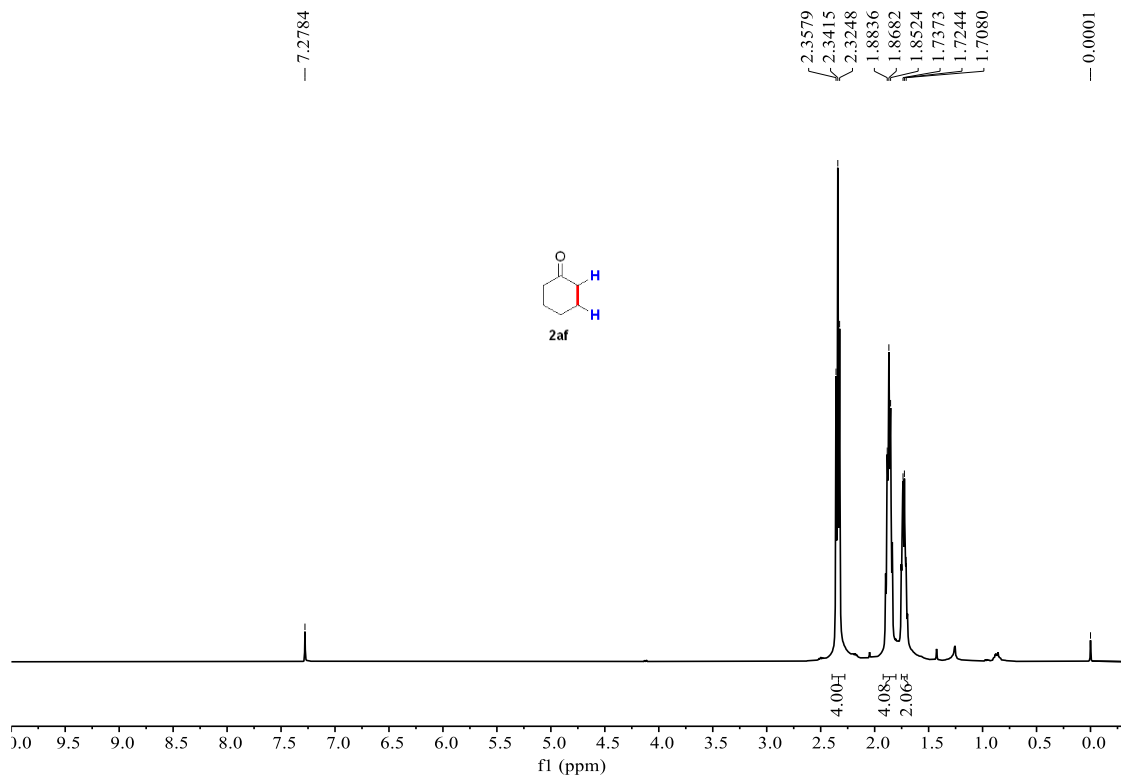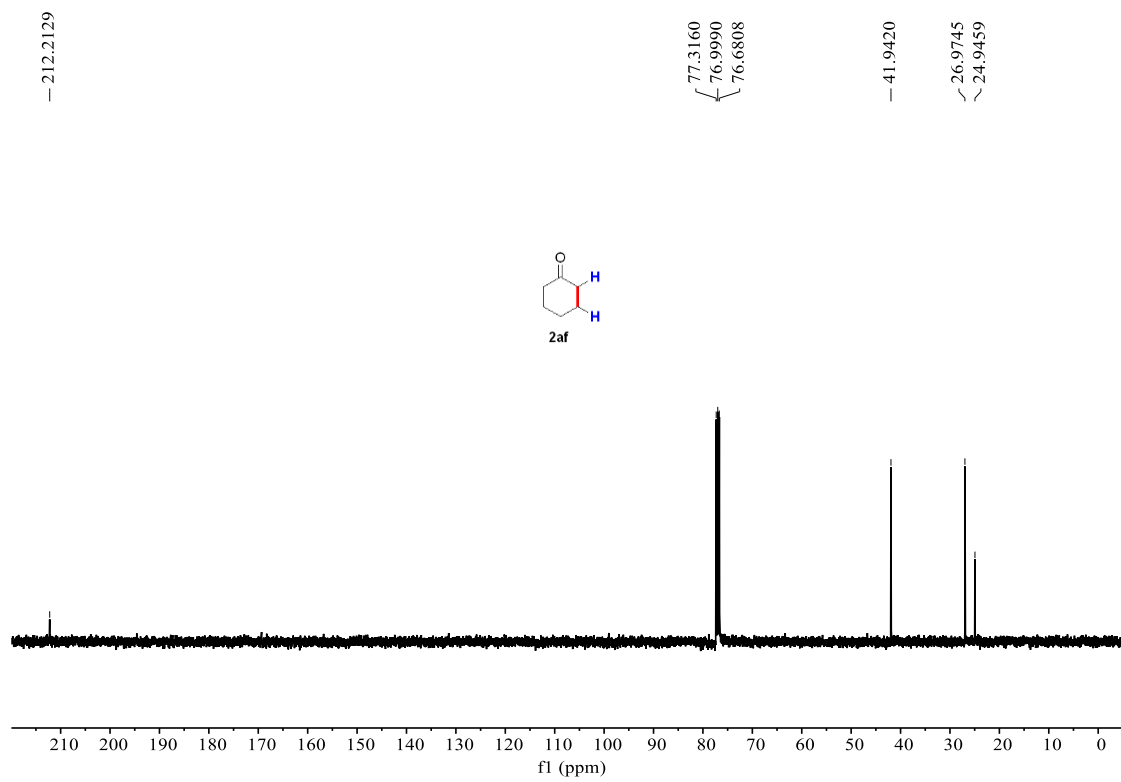

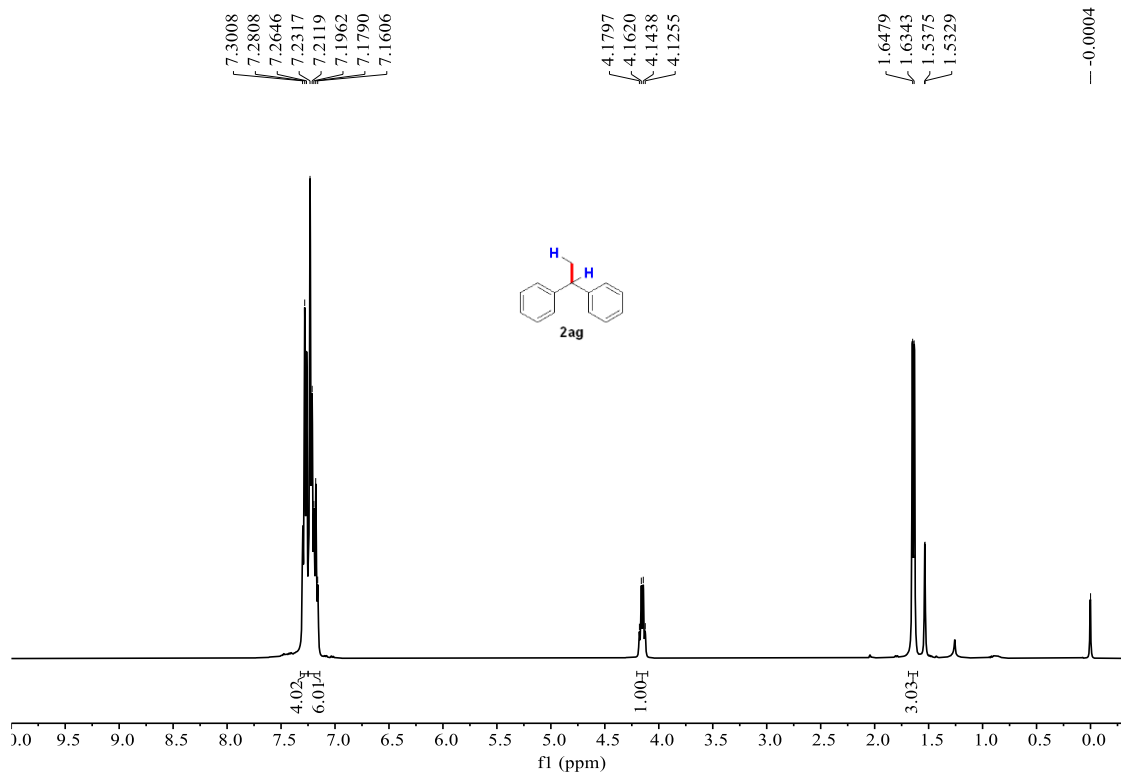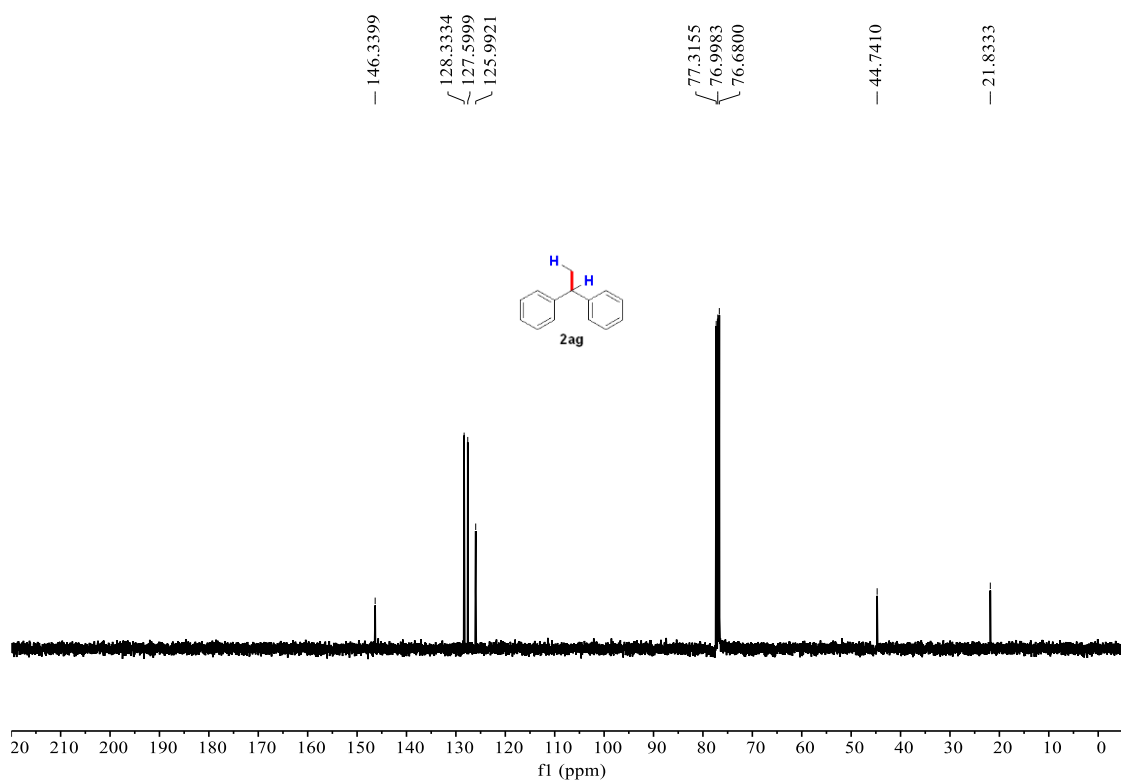

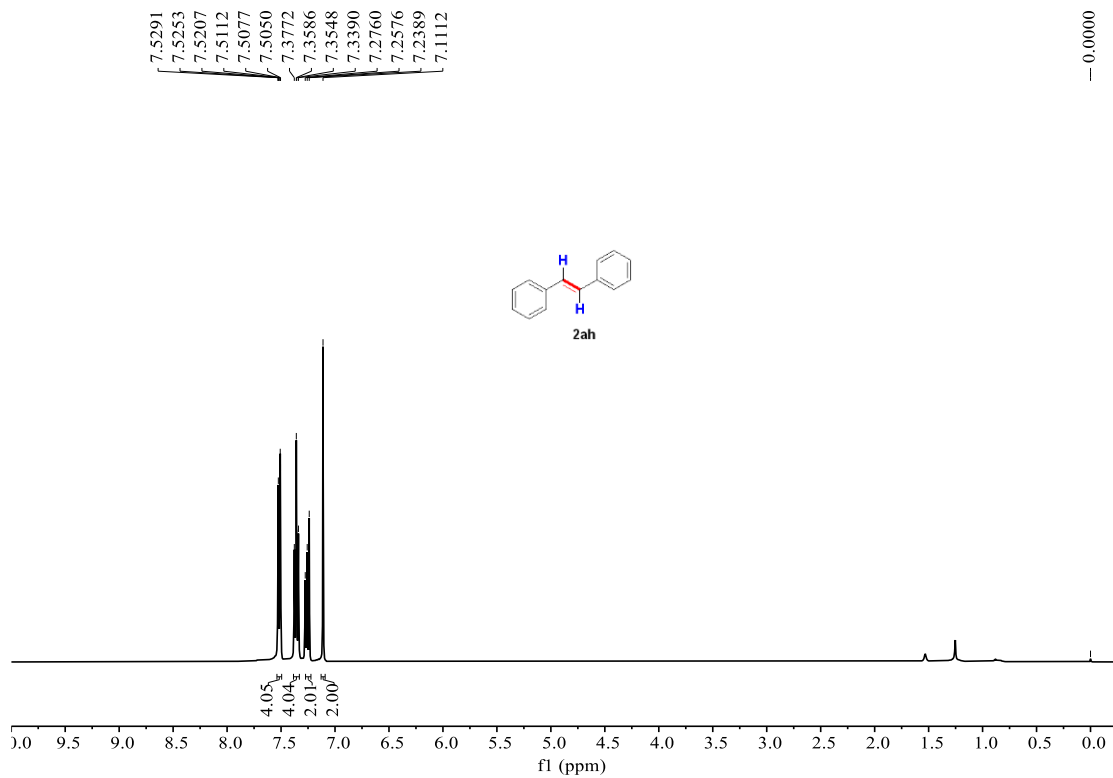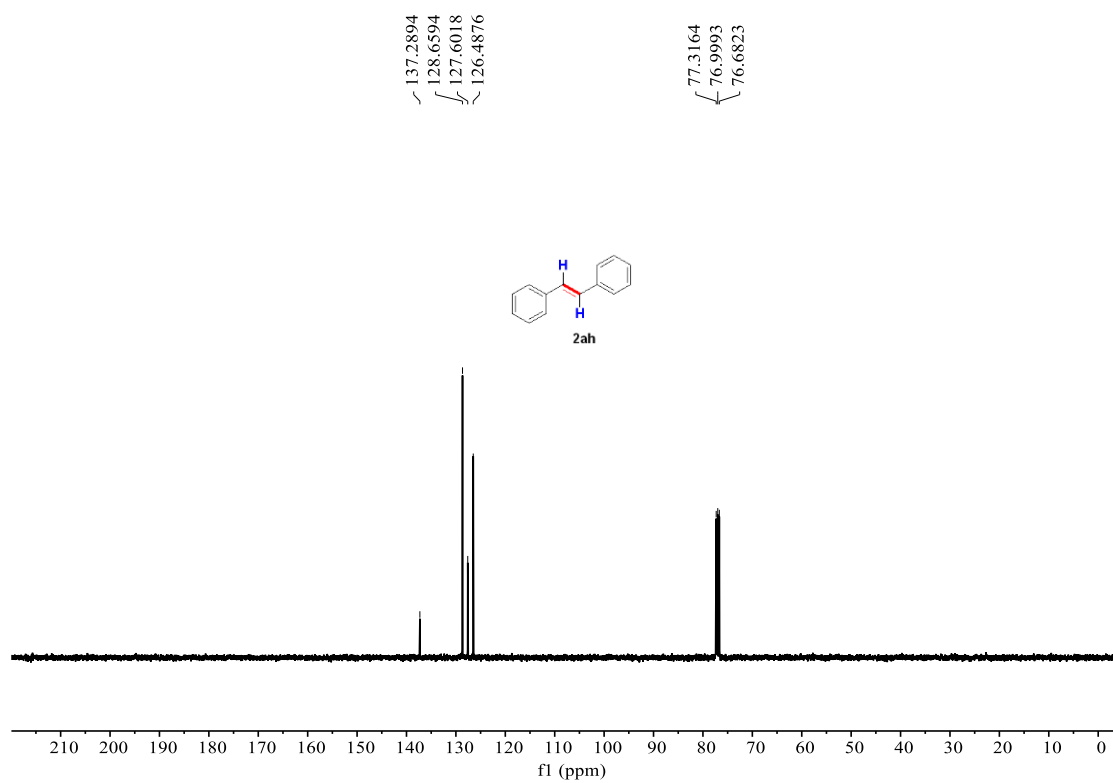

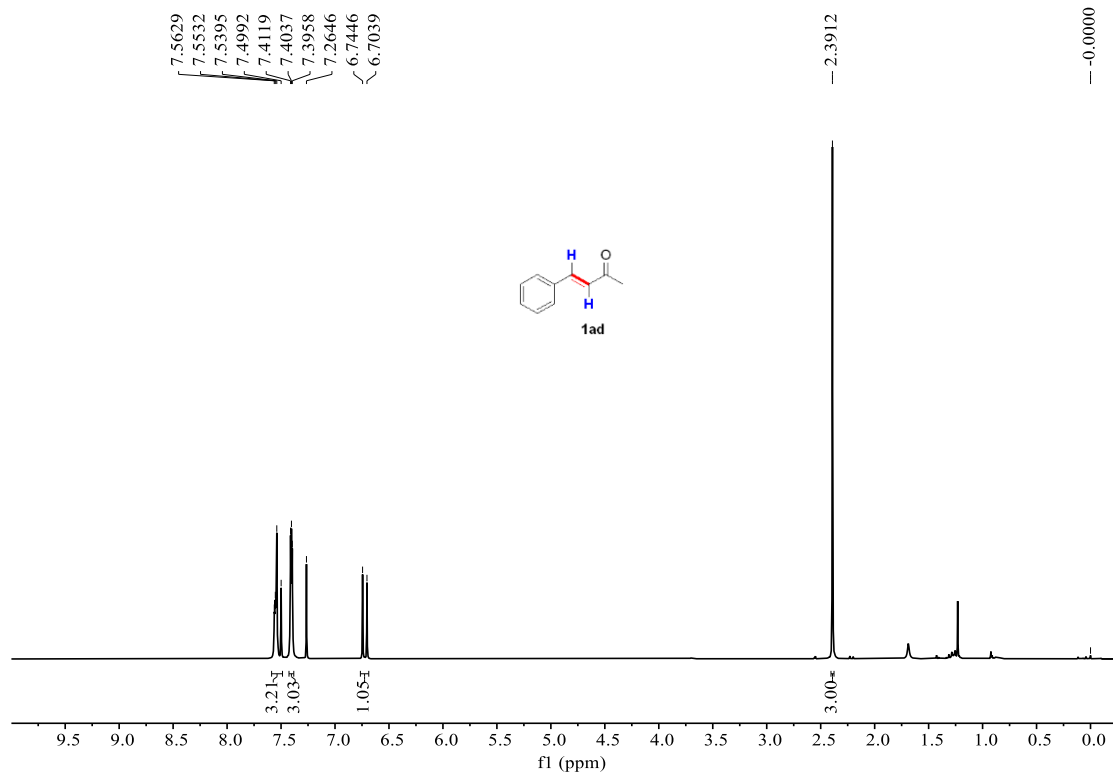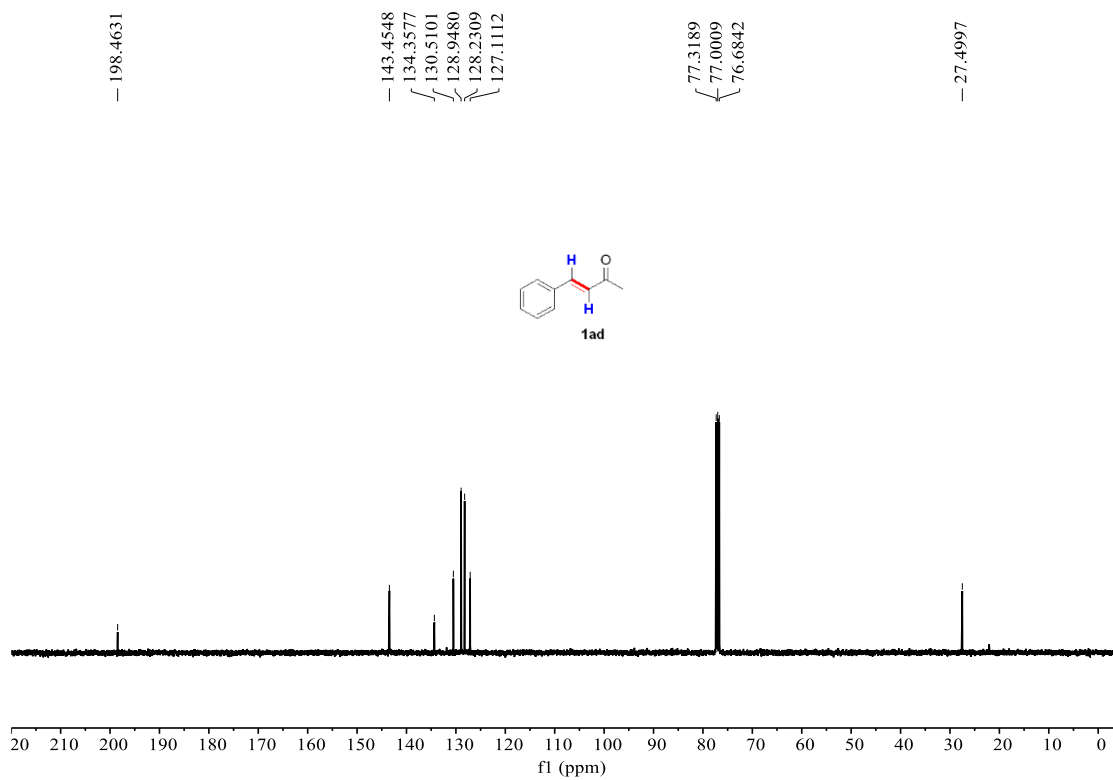

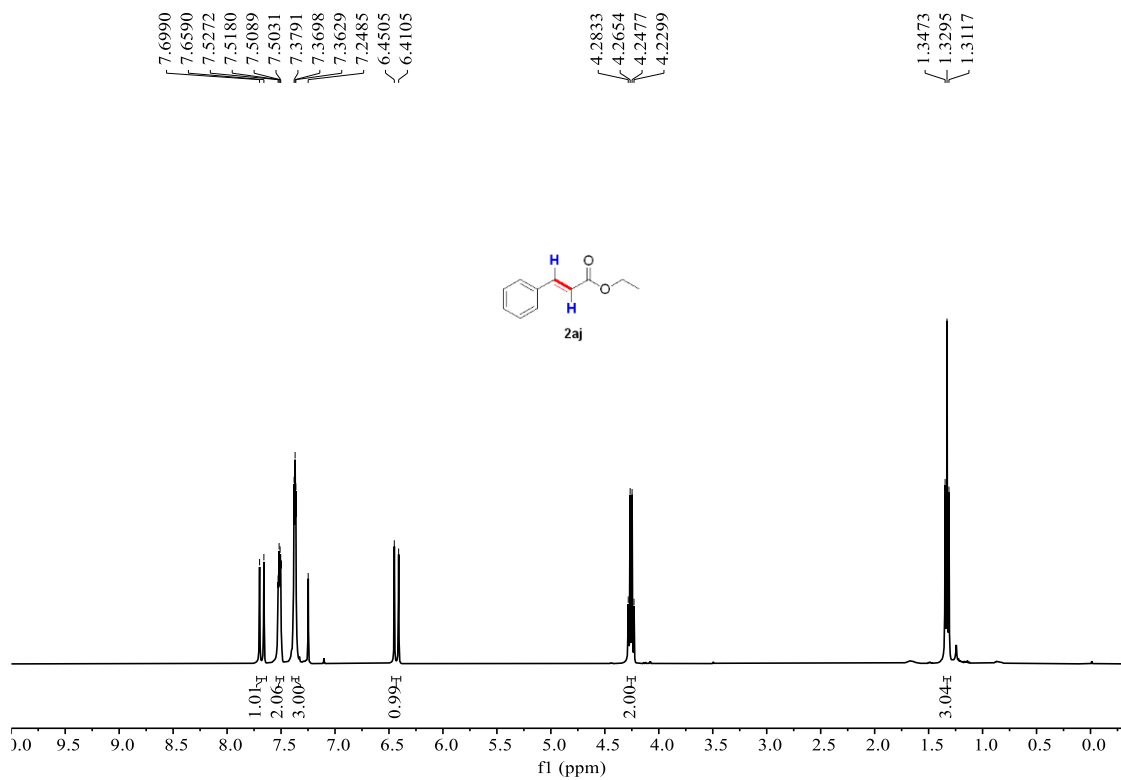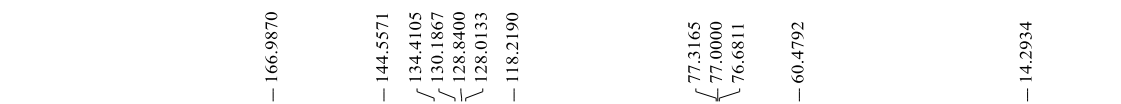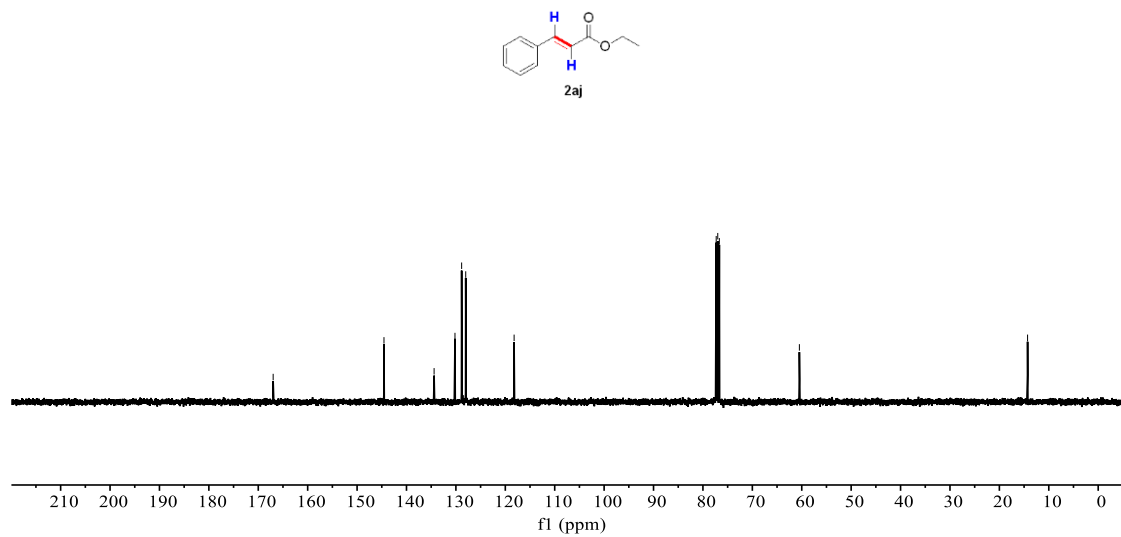

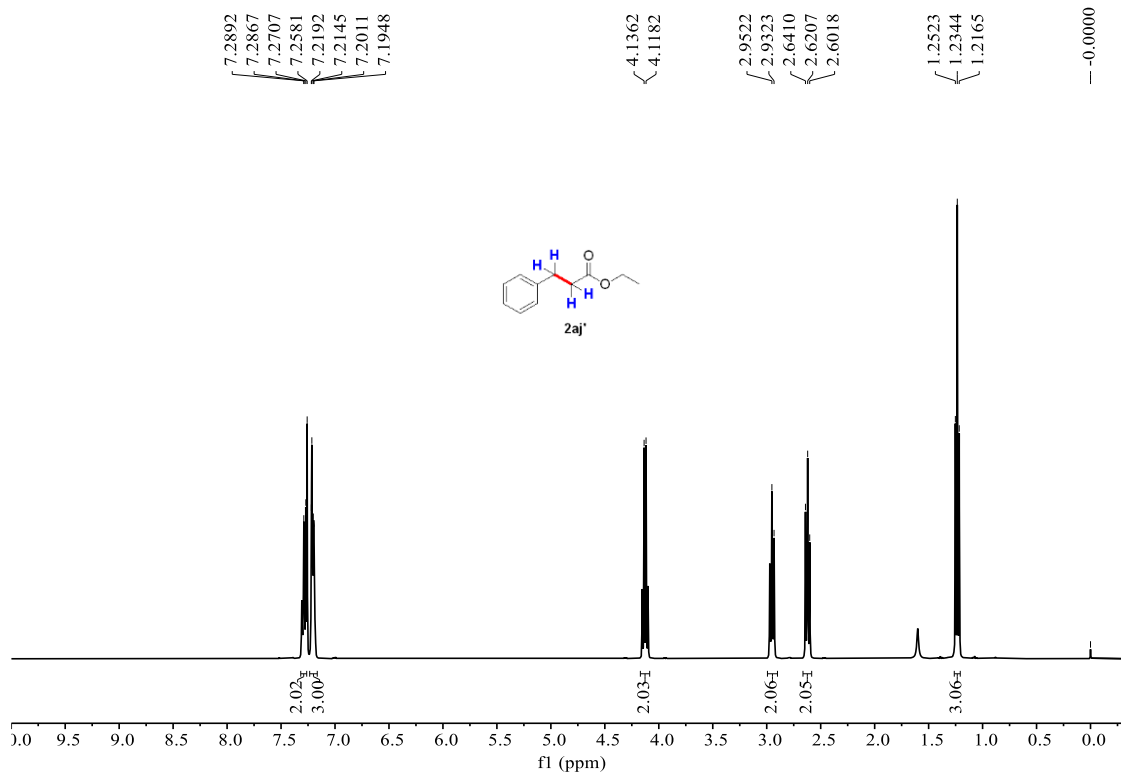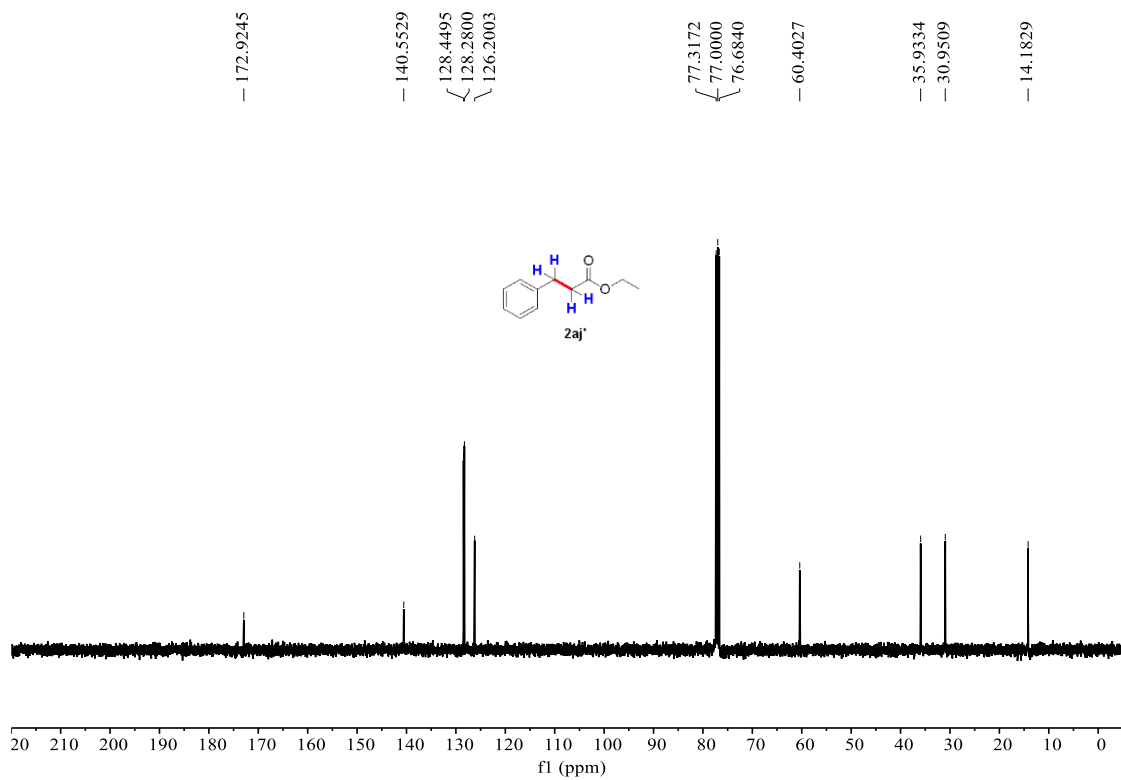

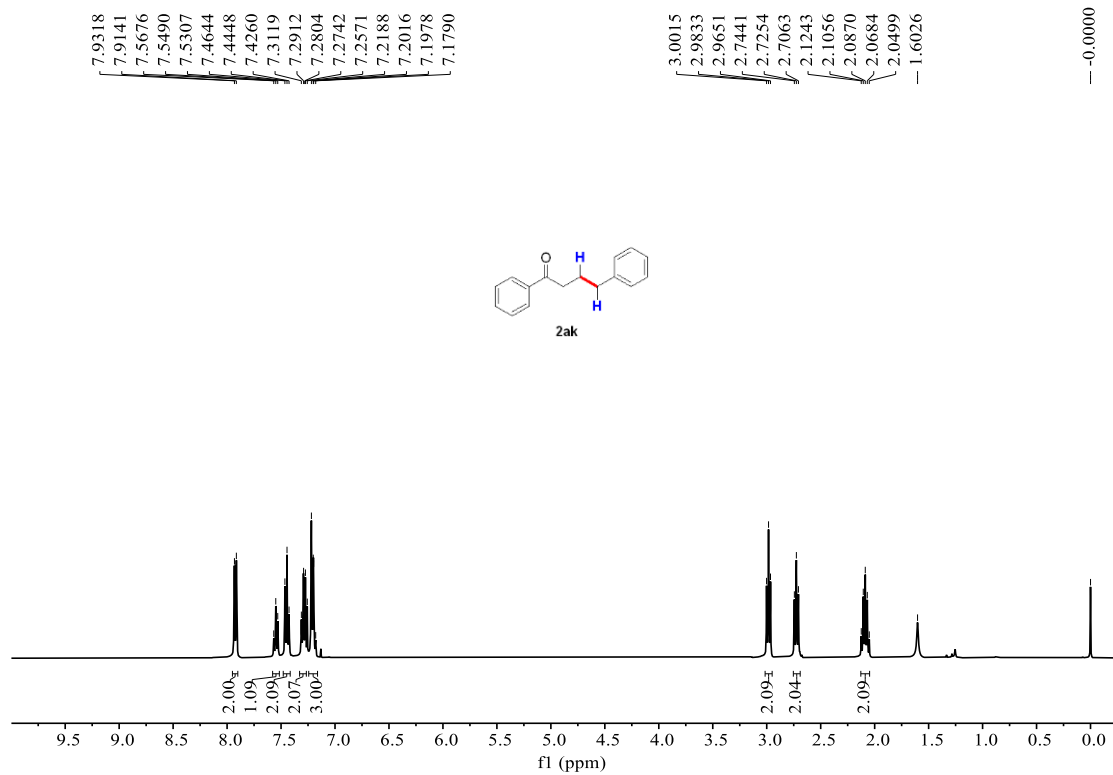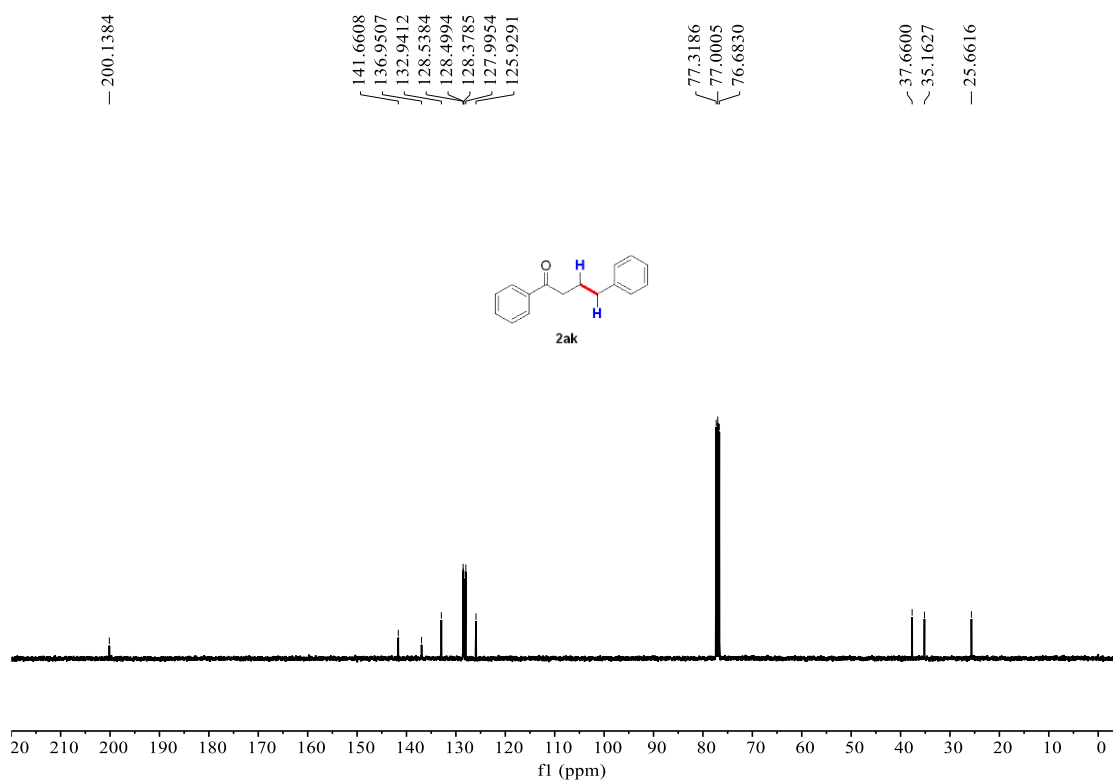

Supplement: d3qo00963g1.pdf [file d3qo00963g1.pdf]
